# Supplementary material for: Synthetic Analogs of Marine Alkaloid Aplysinopsin Suppress Anti-Apoptotic Protein BCL2 in Prostate Cancer
Source: MDPI journal article supplement (doi:10.3390/molecules28010109), 2022-12-23
Supplement: s1 [file s1]

# Synthetic analogs of marine alkaloid aplysinopsin suppress anti-apoptotic protein BCL2 in prostate cancer

Eslam R. El-Sawy<sup>1,\*</sup>, Zeinab A. El-Shahid<sup>2</sup>, Ahmed A.F. Soliman<sup>3</sup>, Amr Nassrallah<sup>4</sup>, Ahmed B. Abdelwahab<sup>5</sup>, Gilbert Kirsch<sup>6,\*</sup> and Heba Abdelmegeed<sup>1,\*</sup>

<sup>1</sup>Chemistry of Natural Compounds Department, National Research Centre, 12622 Giza, Egypt

<sup>2</sup>Chemistry of Natural and Microbial Products Department, National Research Centre, 12622 Giza, Egypt

<sup>3</sup> Drug Bioassay-Cell Culture Laboratory, Pharmacognosy Department, National Research Center, 12622Dokki, Giza, Egypt

<sup>4</sup>Biochemistry Department, Faculty of Agriculture, Cairo University, 12613 Giza, Egypt

<sup>5</sup>Plant Advanced Technologies (PAT), Vandœuvre-lès-Nancy 54500, France

<sup>6</sup>Laboratoire Lorrain de Chimie Moléculaire (L.2.C.M.), Université de Lorraine, 57050 Metz, France

\*Correspondence: eslamelsawy@gmail.com, heba.abdelmegeed.eldeeb@gmail.com, and gilbert.kirsch@univ-lorraine.fr ; Tel.: (+33) 03.72.74.92.00; Fax: (+33) 03.72.74.91.87).

## Materials and Methods

### Chemistry

#### General Information

All reagents and solvents were of commercial grade. Melting points were determined on the digital melting point apparatus (Electro thermal 9100, Electro thermal Engineering Ltd., serial No. 8694, Rochford, UK) and are uncorrected. Elemental analyses were performed on a Flash Smart<sup>TM</sup> Elemental Analyzer (Thermo Scientific, Courtaboeuf, France) and were found within  $\pm 0.4\%$  of the theoretical values. <sup>1</sup>H and <sup>13</sup>C NMR spectra were measured with a Bruker Avance spectrometer (Bruker, Germany) at 400 and 101 MHz, respectively, using TMS as the internal standard. Hydrogen coupling patterns are described as (s) singlet, (d) doublet, (t) triplet, (q) quartet, and (m) multiplet. The chemical shifts were defined as parts per million (ppm) relative to the solvent peak. The reaction progress was checked by pre-coated TLC Silica gel 0.2 nm F254 nm [Fluka], visualized under UV lamp 254 and 365 nm. Cyanoacetic acide hydrazide [21], N-benzyl indoles [22]; methyl creatinine [23]; indole-3-aldehyde [24] were prepared as reported.

#### General procedure for the preparation of aplysinopsins analogs

A solution of oxalyl chloride (0.44 ml, 5.1 mmol) in dry ethyl ether (25 ml) was treated with a solution of indoles (4.14 mmol) in dry ethyl ether (5 ml) dropwise under cooling. The resulting yellow slurry was refluxed for 2 h. After removing the ether under vacuum, the remains were dissolved in dry tetrahydrofuran (20 ml), and then cooled to 0°C. A solution of amines (9.73 mmol) in dry tetrahydrofuran (20 ml) was added slowly to the THF solutions under stirring. After complete addition, 1 ml of triethylamine was added to the reaction mixture and left to stir overnight. The formed precipitate was filtered off, washed several times with water, dried, and recrystallized from acetone.

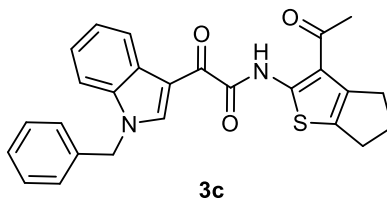

*N*-(3-Acetyl-5,6-dihydro-4H-cyclopenta[*b*]thiophen-2-yl)-2-(1-benzyl-1H-indol-3-yl)-2-oxo-acetamide (**3c**, **EE-65**). Yield (0.35g, 55%); mp 240-2°C; <sup>1</sup>H-NMR (400 MHz, CDCl<sub>3</sub>) δ 13.38 (s, 1H), 9.11 (s, 1H), 8.57 (dt, *J* = 7.9, 1.0 Hz, 1H), 8.04 (s, 1H), 7.43 – 7.15 (m, 7H), 5.42 (s, 2H), 3.19 – 2.81 (m, 6H), 2.58 (s, 3H); <sup>13</sup>C-NMR (101 MHz, CDCl<sub>3</sub>) δ 195.56, 177.42, 162.51, 160.16, 150.37, 141.15, 141.01, 136.55, 135.41, 134.21, 129.06, 128.28, 127.89, 126.92, 124.19, 123.68, 123.04, 119.03, 112.51, 110.58, 51.29, 36.44, 31.42, 31.35, 29.99, 28.73, 28.11; HRMS-(ESI): *m/z* [M+Na]<sup>+</sup> calcd for C<sub>26</sub>H<sub>22</sub>N<sub>2</sub>O<sub>3</sub>SNa (465.12); Anal calcd for C<sub>26</sub>H<sub>22</sub>N<sub>2</sub>O<sub>3</sub>S (442.53): C, 70.57; H, 5.01; N, 6.33; S, 7.24; found: C, 70.44; H, 5.03; N, 6.22; S, 7.11.

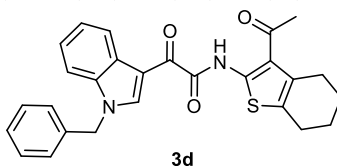

*N*-(3-Acetyl-4,5,6,7-tetrahydrobenzo[*b*]thiophen-2-yl)-2-(1-benzyl-1H-indol-3-yl)-2-oxo-acetamide (**EE-45**, **3d**). Yield (0.42g, 64%); mp 214-6°C; <sup>1</sup>H-NMR (400 MHz, DMSO-*d*<sub>6</sub>) δ 13.28 (s, 1H), 9.25 (s, 1H), 8.47 – 8.14 (m, 1H), 7.81 – 7.51 (m, 1H), 7.46 – 6.92 (m, 7H), 5.66 (s, 2H), 2.84 (d, *J* = 15.8 Hz, 2H), 2.63 (d, *J* = 15.8 Hz, 2H), 2.52 (s, 3H), 1.78 (s, 4H); <sup>13</sup>C-NMR (101 MHz, DMSO) δ 196.76, 177.21, 159.56, 144.82, 141.87, 136.47, 136.25, 130.70, 128.75, 127.85, 127.69, 127.44, 127.11, 123.96, 123.44, 122.75, 121.73, 111.73, 111.11, 49.96, 31.55, 26.45, 24.07, 22.47, 22.12; HRMS-(ESI): *m/z* [M+Na]<sup>+</sup> calcd for C<sub>27</sub>H<sub>24</sub>N<sub>2</sub>O<sub>3</sub>SNa (479.14); Anal calcd for C<sub>27</sub>H<sub>24</sub>N<sub>2</sub>O<sub>3</sub>S (456.56): C, 71.03; H, 5.30; N, 6.14; S, 7.02; found: C, 71.21; H, 5.01; N, 6.22; S, 7.10.

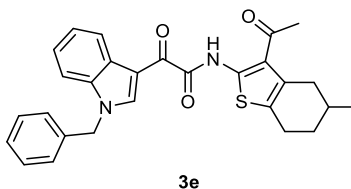

*N*-(3-Acetyl-5-methyl-4,5,6,7-tetrahydrobenzo[*b*]thiophen-2-yl)-2-(1-benzyl-1H-indol-3-yl)-2-oxo-acetamide (**EE-47**, **3e**). Yield (0.61g, 90%), mp 206-8°C; <sup>1</sup>H-NMR (400 MHz, CDCl<sub>3</sub>) δ 13.54 (s, 1H), 9.14 (s, 1H), 8.57 (d, *J* = 7.9 Hz, 1H), 7.30 (ddd, *J* = 28.9, 21.4, 8.6 Hz, 7H), 5.41 (s, 2H), 2.97 (dd, *J* = 34.9, 55.5 Hz, 1H), 2.86-2.80 (m, 1H), 2.51 (s, 3H), 2.51 – 1.99 (m, 1H), 2.03 (d, *J* = 15.8 Hz, 1H), 2.01 (d, *J* = 15.8 Hz, 2H), 1.82 – 1.78 (m, 2H), 0.90 (s, 3H); <sup>13</sup>C-NMR (101 MHz, CDCl<sub>3</sub>) δ 196.35, 177.58, 160.31, 146.32, 141.13, 136.55, 135.41, 130.42, 129.07, 128.29, 127.91, 126.94, 124.18, 123.68, 123.12, 123.05, 112.55, 110.56, 51.30, 35.97, 31.59, 30.73, 29.31, 24.44, 21.77; HRMS-(ESI): *m/z* [M+Na]<sup>+</sup> calcd for C<sub>28</sub>H<sub>26</sub>N<sub>2</sub>O<sub>3</sub>SNa (493.15); Anal calcd for C<sub>28</sub>H<sub>26</sub>N<sub>2</sub>O<sub>3</sub>S (470.59): C, 71.47; H, 5.57; N, 5.95; S, 6.81; found: C, 71.32; H, 5.55; N, 6.00; S, 6.79.

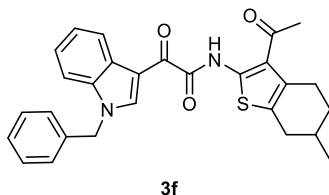

*N*-(3-Acetyl-6-methyl-4,5,6,7-tetrahydrobenzo[*b*]thiophen-2-yl)-2-(1-benzyl-1*H*-indol-3-yl)-2-oxo-acetamide (**EE-46**, **3f**). Yield (0.36g, 53%), mp 210-2°C; <sup>1</sup>H-NMR (400 MHz, CDCl<sub>3</sub>) δ 13.54 (s, 1H), 9.13 (s, 1H), 8.57 (d, *J* = 7.8 Hz, 1H), 7.43 – 7.18 (m, 7H), 5.42 (s, 2H), 2.98 (dd, *J* = 15.9, 5.0 Hz, 1H), 2.84 – 2.72 (m, 1H), 2.58 (s, 3H), 2.41 – 2.27 (m, 1H), 2.19 (s, 1H), 2.08 – 1.87 (m, 1H), 1.58 (d, *J* = 28.1 Hz, 1H), 1.51 – 1.24 (m, 2H), 1.14 (s, 3H); Anal calcd for C<sub>28</sub>H<sub>26</sub>N<sub>2</sub>O<sub>3</sub>S (470.59): C, 71.47; H, 5.57; N, 5.95; S, 6.81; found: C, 71.32; H, 5.61; N, 6.01; S, 6.51.

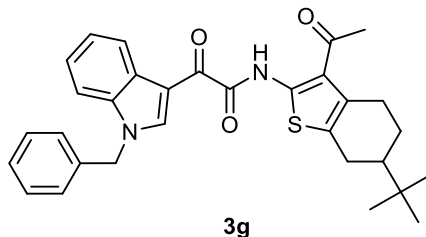

*N*-(3-Acetyl-6-(tert-butyl)-4,5,6,7-tetrahydrobenzo[*b*]thiophen-2-yl)-2-(1-benzyl-1*H*-indol-3-yl)-2-oxo-acetamide (**EE-43**, **3g**). Yield (0.35g, 47%); mp 115-7°C; <sup>1</sup>H-NMR (400 MHz, CDCl<sub>3</sub>) δ 13.55 (s, 1H), 9.13 (s, 1H), 8.57 (d, *J* = 7.8 Hz, 1H), 7.41 – 7.17 (m, 8H), 5.41 (s, 2H), 3.04 (dd, *J* = 16.0, 4.7 Hz, 2H), 2.84 – 2.73 (m, 2H), 2.57 (s, 3H), 1.62 – 1.50 (m, 2H), 1.45 – 1.34 (m, 1H), 0.98 (s, 9H); <sup>13</sup>C-NMR (101 MHz, CDCl<sub>3</sub>) δ 196.29, 177.60, 160.30, 146.27, 141.14, 136.55, 135.42, 130.40, 129.32, 129.07, 129.03, 128.28, 128.22, 127.91, 126.93, 125.29, 124.17, 123.67, 123.05, 122.86, 112.54, 110.57, 51.29, 47.02, 44.67, 32.42, 31.43, 28.62, 27.24, 26.17, 24.69, 21.43; HRMS-(ESI): *m/z* [M+Na]<sup>+</sup> calcd for C<sub>31</sub>H<sub>32</sub>N<sub>2</sub>O<sub>3</sub>SSNa (535.20); Anal calcd for: C<sub>31</sub>H<sub>32</sub>N<sub>2</sub>O<sub>3</sub>S (512.67): C, 72.63; H, 6.29; N, 5.46; S, 6.25; found: C, 72.59; H, 6.31; N, 5.50; S, 6.29.

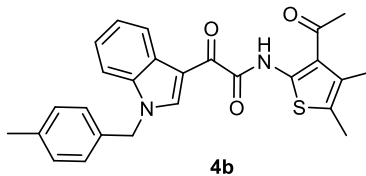

*N*-(3-Acetyl-4,5-dimethylthiophen-2-yl)-2-(1-(4-methylbenzyl)-1*H*-indol-3-yl)-2-oxo-acetamide (**EE-67**, **4b**). Yield (0.28g, 47%); mp 201-3°C; <sup>1</sup>H-NMR (400 MHz, CDCl<sub>3</sub>) δ 13.46 (s, 1H), 9.11 (s, 1H), 8.56 (d, *J* = 7.8 Hz, 1H), 7.46 – 7.05 (m, 7H), 5.37 (s, 2H), 2.63 (s, 3H), 2.43 – 2.27 (m, 6H), 1.58 (s, 3H); <sup>13</sup>C-NMR (101 MHz, CDCl<sub>3</sub>) δ 145.02, 141.09, 138.12, 136.55, 132.33, 129.72, 127.93, 126.99, 125.21, 124.42, 124.12, 123.64, 123.02, 110.60, 51.14, 31.40, 21.08, 15.27, 12.78; HRMS-(ESI): *m/z* [M+Na]<sup>+</sup> calcd for C<sub>26</sub>H<sub>24</sub>N<sub>2</sub>O<sub>3</sub>SSNa (467.14); Anal calcd for: C<sub>26</sub>H<sub>24</sub>N<sub>2</sub>O<sub>3</sub>S (444.55): C, 70.25; H, 5.44; N, 6.30; S, 7.21; found: C, 70.12; H, 5.22; N, 6.21; S, 7.01.

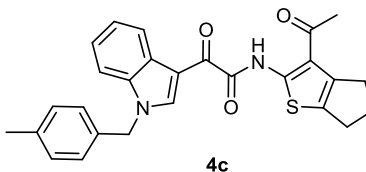

*N*-(3-Acetyl-5,6-dihydro-4*H*-cyclopenta[*b*]thiophen-2-yl)-2-(1-(4-methylbenzyl)-1*H*-indol-3-yl)-2-oxo-acetamide (**EE-119**, **4c**). Yield (0.37g, 60%); mp 233-5°C; <sup>1</sup>H-NMR (400 MHz, CDCl<sub>3</sub>) δ 13.40 (s, 1H), 9.11 (s, 1H), 8.56 (d, *J* = 7.8 Hz, 1H), 7.48 – 7.02 (m, 9H), 5.38 (s, 2H), 3.11 – 2.90 (m, 2H), 2.54 (d, *J* = 4.9 Hz, 2H), 2.34 (s, 3H), 1.59 (s, 3H); <sup>13</sup>C-NMR (101 MHz, CDCl<sub>3</sub>) δ 195.54, 177.38, 160.21, 150.40, 141.11, 141.00, 138.11, 136.56, 134.18, 132.34, 129.72, 127.93, 126.98, 124.13, 123.64, 123.02, 119.02, 112.44, 110.62, 51.13, 31.36, 29.98, 28.73, 28.12, 21.08; Anal calcd for C<sub>27</sub>H<sub>24</sub>N<sub>2</sub>O<sub>3</sub>S (456.56): C, 71.03; H, 5.30; N, 6.14; S, 7.02; found: C, 71.00; H, 5.22; N, 6.24; S, 6.98.

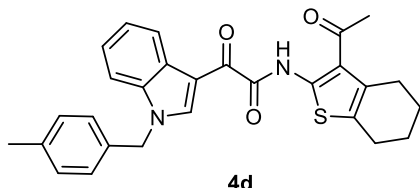

N-(3-Acetyl-4,5,6,7-tetrahydrobenzo[b]thiophen-2-yl)-2-(1-(4-methylbenzyl)-1H-indol-3-yl)-2-oxoacetamide (**EE-69**, **4d**). Yield (0.53g, 84%); mp 177-9°C; <sup>1</sup>H-NMR (400 MHz, CDCl<sub>3</sub>) δ 13.53 (s, 1H), 9.10 (s, 1H), 8.56 (d, *J* = 7.8 Hz, 1H), 7.39 – 6.91 (m, 7H), 5.37 (s, 2H), 2.33 (d, *J* = 15.8 Hz, 2H), 2.64 (d, *J* = 15.8 Hz, 2H), 2.57 (s, 3H), 2.37 (s, 3H), 1.97 – 1.79 (m, 4H); <sup>13</sup>C-NMR (101 MHz, CDCl<sub>3</sub>) δ 196.27, 177.56, 160.36, 146.11, 141.05, 138.11, 136.57, 132.35, 130.35, 129.71, 128.51, 127.95, 127.00, 124.09, 123.61, 123.23, 123.03, 112.48, 110.57, 51.12, 31.48, 27.47, 24.66, 23.04, 22.63, 21.05; HRMS-(ESI): *m/z* [M+Na]<sup>+</sup> calcd for C<sub>28</sub>H<sub>26</sub>N<sub>2</sub>O<sub>3</sub>Na (493.15); Anal calcd for C<sub>28</sub>H<sub>26</sub>N<sub>2</sub>O<sub>3</sub>S (470.59): C, 71.47; H, 5.57; N, 5.95; S, 6.81; found: C, 71.32; H, 5.48; N, 5.87; S, 6.79.

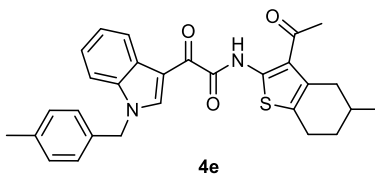

N-(3-Acetyl-5-methyl-4,5,6,7-tetrahydrobenzo[b]thiophen-2-yl)-2-(1-(4-methylbenzyl)-1H-indol-3-yl)-2-oxoacetamide (**EE-70**, **4e**). Yield (0.40g, 61%); mp 208-10°C; <sup>1</sup>H-NMR (400 MHz, CDCl<sub>3</sub>) δ 13.55 (s, 1H), 9.11 (d, *J* = 9.5 Hz, 1H), 8.56 (d, *J* = 7.9 Hz, 1H), 7.42 – 7.05 (m, 7H), 5.37 (s, 2H), 2.96 (dt, *J* = 34.9, 17.4 Hz, 1H), 2.83 – 2.67 (m, 2H), 2.58 (s, 3H), 2.46 – 2.32 (m, 1H), 2.35 (s, 3H), 2.05 – 1.82 (m, 1H), 1.63 – 1.44 (m, 2H), 1.16 (s, 3H); <sup>13</sup>C-NMR (101 MHz, CDCl<sub>3</sub>) δ 196.33, 177.53, 160.33, 146.34, 141.09, 138.11, 136.55, 132.34, 130.41, 129.72, 128.23, 127.93, 127.00, 124.11, 123.63, 123.10, 123.02, 112.46, 110.60, 51.13, 35.96, 31.58, 30.73, 29.30, 24.44, 21.76, 21.08; HRMS-(ESI): *m/z* [M+Na]<sup>+</sup> calcd for C<sub>29</sub>H<sub>28</sub>N<sub>2</sub>O<sub>3</sub>Na (507.16); Anal calcd for C<sub>29</sub>H<sub>28</sub>N<sub>2</sub>O<sub>3</sub>S (484.61): C, 71.88; H, 5.82; N, 5.78; S, 6.62; found: C, 71.89; H, 5.77; N, 5.81; S, 6.59.

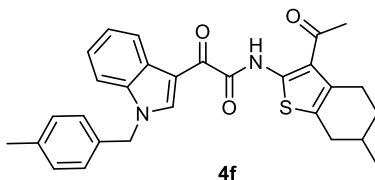

N-(3-Acetyl-6-methyl-4,5,6,7-tetrahydrobenzo[b]thiophen-2-yl)-2-(1-(4-methylbenzyl)-1H-indol-3-yl)-2-oxoacetamide (**EE-71**, **4f**). Yield (0.58g, 88%); mp 176-8°C; <sup>1</sup>H-NMR (400 MHz, CDCl<sub>3</sub>) δ 13.55 (s, 1H), 9.11 (s, 1H), 8.56 (d, *J* = 7.9 Hz, 1H), 7.44 – 7.09 (m, 7H), 5.37 (s, 2H), 3.00 (dd, *J* = 26.9, 15.0 Hz, 1H), 2.84 – 2.70 (m, 2H), 2.58 (d, *J* = 2.9 Hz, 3H), 2.36 (d, *J* = 12.1 Hz, 1H), 2.25 – 2.13 (m, 1H), 1.95 (t, *J* = 26.2 Hz, 2H), 1.66 – 1.56 (m, 2H), 1.13 (d, *J* = 6.5 Hz, 1H), 0.99 (s, 3H); <sup>13</sup>C NMR (101 MHz, CDCl<sub>3</sub>) δ 196.32, 196.28, 177.52, 160.35, 146.29, 146.22, 141.10, 138.11, 136.55, 132.34, 130.39, 130.05, 129.72, 129.29, 128.27, 127.94, 127.00, 124.11, 123.63, 123.02, 122.84, 112.46, 110.60, 51.13, 44.67, 32.75, 32.41, 31.51, 31.42, 31.24, 28.95, 28.62, 27.27, 27.24, 26.17, 24.69, 21.28, 21.08; Anal calcd for C<sub>29</sub>H<sub>28</sub>N<sub>2</sub>O<sub>3</sub>S (484.61): C, 71.88; H, 5.82; N, 5.78; S, 6.62; found: C, 71.89; H, 5.77; N, 5.81; S, 6.59.

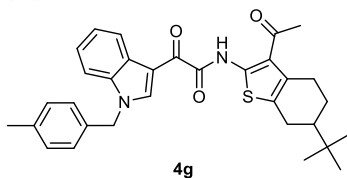

N-(3-Acetyl-6-(tert-butyl)-4,5,6,7-tetrahydrobenzo[b]thiophen-2-yl)-2-(1-(4-methylbenzyl)-1H-indol-3-yl)-2-oxoacetamide (**EE-72**, **4g**). Yield (0.41g, 58%); mp 166-8°C; <sup>1</sup>H-NMR (400 MHz, CDCl<sub>3</sub>) δ 13.54 (s, 1H),

9.10 (s, 1H), 8.52 (s, 1H), 7.43 – 7.08 (m, 7H), 5.38 (s, 2H), 3.08 (d,  $J = 15.7$  Hz, 2H), 2.77 (d,  $J = 15.7$  Hz, 2H), 2.54 (s, 3H), 2.34 (s, 3H), 1.45 (m, 3H), 1.01 (s, 9H);  $^{13}\text{C-NMR}$  (101 MHz,  $\text{CDCl}_3$ )  $\delta$  196.26, 160.35, 146.29, 141.09, 138.11, 136.56, 132.35, 130.38, 129.72, 129.29, 127.95, 126.98, 124.11, 123.62, 123.03, 122.85, 112.47, 110.59, 51.13, 44.68, 32.41, 31.40, 28.63, 27.24, 26.17, 24.70, 21.07; Anal calcd for  $\text{C}_{32}\text{H}_{34}\text{N}_2\text{O}_3\text{S}$  (526.70): C, 72.97; H, 6.51; N, 5.32; S, 6.09; found: C, 73.00; H, 6.49; N, 5.21; S, 5.99.

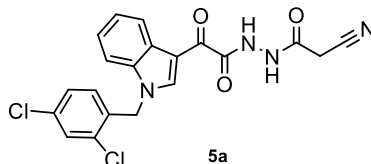

N'-(2-cyanoacetyl)-2-(1-(2,4-dichlorobenzyl)-1H-indol-3-yl)-2-oxoacetohydrazide (**EE-73**, **5a**). Yield (0.36g, 77%); mp 256–8°C;  $^1\text{H-NMR}$  (400 MHz,  $\text{DMSO-}d_6$ )  $\delta$  10.81 (s, 1H), 10.41 (s, 1H), 8.89 (s, 1H), 8.21 (s, 1H), 7.66 (d,  $J = 8.8$  Hz, 1H), 7.35 (d,  $J = 8.7$  Hz, 1H), 7.18 (dd,  $J = 20.3, 8.1$  Hz, 4H), 5.56 (s, 2H), 3.83 (s, 2H);  $^{13}\text{C-NMR}$  (101 MHz,  $\text{CDCl}_3$ )  $\delta$  194.03, 180.86, 162.03, 161.47, 141.95, 137.40, 135.07, 133.25, 129.46, 129.37, 129.31, 128.14, 127.86, 127.56, 127.47, 123.90, 120.66, 115.55, 113.56, 111.24, 69.79, 50.04, 45.84; Anal calcd for  $\text{C}_{20}\text{H}_{14}\text{Cl}_2\text{N}_4\text{O}_3$  (429.26): C, 55.96; H, 3.29; Cl, 16.52; N, 13.05; found: C, 55.88; H, 3.21; N, 12.99.

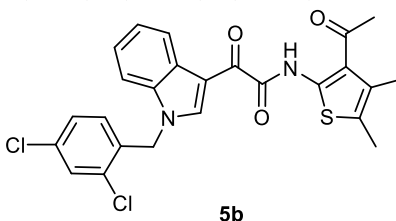

N-(3-Acetyl-4,5-dimethylthiophen-2-yl)-2-(1-(2,4-dichlorobenzyl)-1H-indol-3-yl)-2-oxoacetamide (**EE-74**, **5b**). Yield (0.39g, 72%); mp 227–9°C;  $^1\text{H-NMR}$  (400 MHz,  $\text{CDCl}_3$ )  $\delta$  13.47 (s, 1H), 9.09 (s, 1H), 8.58 (d,  $J = 7.9$  Hz, 1H), 7.52 – 7.09 (m, 5H), 6.73 (d,  $J = 8.3$  Hz, 1H), 5.49 (s, 2H), 2.62 (s, 3H), 2.37 (d,  $J = 10.0$  Hz, 6H);  $^{13}\text{C NMR}$  (101 MHz,  $\text{CDCl}_3$ )  $\delta$  196.72, 177.73, 160.07, 144.92, 141.04, 136.35, 134.83, 133.36, 131.69, 129.73, 129.06, 128.49, 127.81, 127.70, 125.36, 124.46, 123.89, 123.11, 112.87, 110.26, 45.86, 31.39, 8.63; **HRMS**-(ESI):  $m/z$   $[\text{M}+\text{Na}]^+$  calcd for  $\text{C}_{25}\text{H}_{20}\text{Cl}_2\text{N}_2\text{O}_3\text{SNa}$  (521.04); Anal calcd for  $\text{C}_{25}\text{H}_{20}\text{Cl}_2\text{N}_2\text{O}_3\text{S}$  (499.41): C, 60.13; H, 4.04; N, 5.61; S, 6.42; found: C, 60.01; H, 4.00; N, 5.54; S, 6.32.

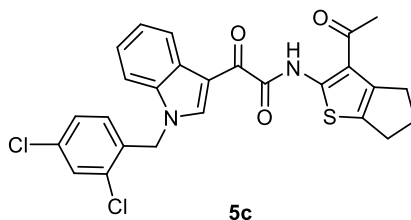

N-(3-acetyl-5,6-dihydro-4H-cyclopenta[b]thiophen-2-yl)-2-(1-(2,4-dichlorobenzyl)-1H-indol-3-yl)-2-oxoacetamide (**EE-75**, **5c**). Yield (0.31g, 54%); mp 239–241°C;  $^1\text{H-NMR}$  (400 MHz,  $\text{CDCl}_3$ )  $\delta$  13.41 (s, 1H), 9.10 (s, 1H), 8.60 (s, 1H), 7.59 – 7.11 (m, 5H), 6.73 (d,  $J = 15.9$  Hz, 1H), 5.50 (s, 2H), 3.13 – 2.97 (m, 2H), 2.95 (t,  $J = 12.3$  Hz, 2H), 2.54 (s, 3H), 2.52 (d,  $J = 9.7$  Hz, 1H), 2.21 (s, 1H); **HRMS**-(ESI):  $m/z$   $[\text{M}+\text{Na}]^+$  calcd for  $\text{C}_{26}\text{H}_{20}\text{Cl}_2\text{N}_2\text{O}_3\text{SNa}$  (533.04); Anal calcd for  $\text{C}_{26}\text{H}_{20}\text{Cl}_2\text{N}_2\text{O}_3\text{S}$  (511.42): C, 61.06; H, 3.94; N, 5.48; S, 6.27; found: C, 61.22; H, 4.01; N, 5.35; S, 6.12.

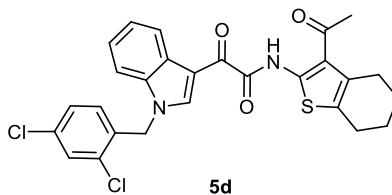

*N*-(3-Acetyl-4,5,6,7-tetrahydrobenzo[*b*]thiophen-2-yl)-2-(1-(2,4-dichlorobenzyl)-1*H*-indol-3-yl)-2-oxo-acetamide (**EE-76**, **5d**). Yield (0.36g, 63%); mp 189-91°C; <sup>1</sup>H-NMR (400 MHz, CDCl<sub>3</sub>) δ 13.56 (s, 1H), 9.06 (s, 1H), 8.58 (d, *J* = 7.7 Hz, 1H), 7.34 (dt, *J* = 70.1, 43.8 Hz, 5H), 6.72 (d, *J* = 13.8 Hz, 1H), 5.49 (s, 2H), 2.86 (d, *J* = 9.7 Hz, 2H), 2.74 (d, *J* = 9.7 Hz, 2H), 2.58 (s, 3H), 1.89 (t, 3H), 1.59 (s, 1H); <sup>13</sup>C-NMR (101 MHz, CDCl<sub>3</sub>) δ 196.40, 177.74, 160.13, 146.00, 141.02, 136.34, 134.83, 133.34, 131.71, 130.41, 129.74, 129.03, 128.65, 127.83, 127.74, 124.46, 123.91, 123.27, 123.18, 112.91, 110.23, 48.16, 31.55, 27.48, 24.67, 23.02, 22.61; HRMS-(ESI): *m/z* [M+Na]<sup>+</sup> calcd for C<sub>27</sub>H<sub>22</sub>Cl<sub>2</sub>N<sub>2</sub>O<sub>3</sub>SNa (547.06); Anal calcd for C<sub>27</sub>H<sub>22</sub>Cl<sub>2</sub>N<sub>2</sub>O<sub>3</sub>S (525.44): C, 61.72; H, 4.22; N, 5.33; S, 6.10; found: C, 61.66; H, 4.32; N, 5.21; S, 6.23.

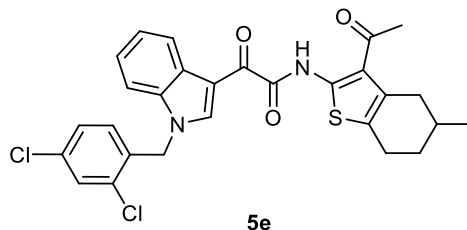

*N*-(3-Acetyl-5-methyl-4,5,6,7-tetrahydrobenzo[*b*]thiophen-2-yl)-2-(1-(2,4-dichlorobenzyl)-1*H*-indol-3-yl)-2-oxo-acetamide (**EE-77**, **5e**). Yield (0.47g, 82%); mp 283-5°C; <sup>1</sup>H-NMR (400 MHz, CDCl<sub>3</sub>) δ 13.55 (s, 1H), 9.09 (s, 1H), 8.58 (d, *J* = 7.8 Hz, 1H), 7.55 – 7.19 (m, 4H), 7.14 (dd, *J* = 8.3, 2.0 Hz, 1H), 6.73 (d, *J* = 8.4 Hz, 1H), 5.46 (s, 2H), 2.97 (d, *J* = 12.1 Hz, 1H), 2.86 – 2.67 (m, 2H), 2.58 (s, 3H), 2.44 – 2.27 (m, 2H), 1.98 (dd, *J* = 29.4, 21.0 Hz, 1H), 1.48 (dd, *J* = 8.8, 4.4 Hz, 1H), 1.13 (s, 3H); <sup>13</sup>C-NMR (101 MHz, CDCl<sub>3</sub>) δ 196.26, 177.35, 159.67, 145.75, 141.04, 136.10, 134.06, 131.72, 129.74, 129.48, 128.27, 124.47, 123.92, 123.39, 113.13, 110.24, 48.09, 36.18, 31.81, 30.72, 29.48, 24.29, 21.95; Anal calcd for C<sub>28</sub>H<sub>24</sub>Cl<sub>2</sub>N<sub>2</sub>O<sub>3</sub>S (539.47): C, 62.34; H, 4.48; N, 5.19; S, 5.94; found: C, 62.22; H, 4.35; N, 5.01; S, 6.00

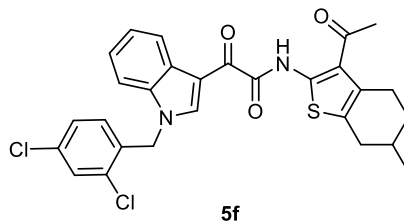

*N*-(3-Acetyl-6-methyl-4,5,6,7-tetrahydrobenzo[*b*]thiophen-2-yl)-2-(1-(2,4-dichlorobenzyl)-1*H*-indol-3-yl)-2-oxo-acetamide (**EE-78**, **5f**). Yield (0.44g, 75%); mp 206-8°C; <sup>1</sup>H-NMR (400 MHz, CDCl<sub>3</sub>) δ 13.56 (s, 1H), 9.09 (m, 1H), 8.58 (s, 1H), 7.50 – 7.27 (m, 4H), 7.15-7.13 (d, *J* = 6.0 Hz, 1H), 6.72 (d, *J* = 7.7 Hz, 1H), 5.48 (d, *J* = 2.8 Hz, 2H), 2.97 (d, *J* = 14.7 Hz, 1H), 2.82 (d, *J* = 16.3 Hz, 2H), 2.58 (d, *J* = 2.5 Hz, 3H), 2.37 (t, 1H), 1.98 (s, 1H), 1.56 (t, *J* = 17.4 Hz, 2H), 1.13 (s, 3H); <sup>13</sup>C-NMR (101 MHz, CDCl<sub>3</sub>) δ 196.41, 177.73, 160.14, 146.13, 141.03, 136.34, 134.83, 133.33, 131.71, 130.09, 129.74, 129.01, 128.41, 127.83, 127.74, 124.47, 123.92, 123.18, 123.09, 112.91, 110.23, 48.16, 32.76, 31.53, 31.22, 28.94, 27.27, 21.28; HRMS-(ESI): *m/z* [M+Na]<sup>+</sup> calcd for C<sub>28</sub>H<sub>24</sub>Cl<sub>2</sub>N<sub>2</sub>O<sub>3</sub>SNa (561.08); Anal calcd for C<sub>28</sub>H<sub>24</sub>Cl<sub>2</sub>N<sub>2</sub>O<sub>3</sub>S (539.47): C, 62.34; H, 4.48; N, 5.19; S, 5.94; found: C, 62.45; H, 4.55; N, 5.21; S, 6.09

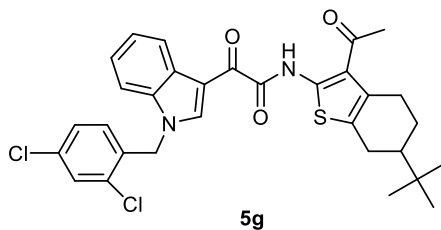

*N*-(3-Acetyl-6-(tert-butyl)-4,5,6,7-tetrahydrobenzo[*b*]thiophen-2-yl)-2-(1-(2,4-dichloro-benzyl)-1*H*-indol-3-yl)-2-oxo-acetamide (**EE-79**, **5g**). Yield (0.32g, 51%); mp 241-3°C; <sup>1</sup>H-NMR (400 MHz, CDCl<sub>3</sub>) δ 13.55 (s, 1H), 9.10 (s, 1H), 8.58 (d, *J* = 7.7 Hz, 1H), 7.47 (t, *J* = 14.8 Hz, 1H), 7.43 – 7.19 (m, 3H), 7.15 (dd, *J* = 8.4, 2.1

Hz, 1H), 6.72 (d,  $J = 8.4$  Hz, 1H), 5.49 (s, 2H), 3.12 – 2.95 (m, 1H), 2.84 – 2.69 (m, 2H), 2.58 – 2.39 (m, 4H), 2.14 (d,  $J = 9.4$  Hz, 1H), 1.68 – 1.30 (m, 2H), 0.99 (s, 9H);  $^{13}\text{C-NMR}$  (101 MHz,  $\text{CDCl}_3$ )  $\delta$  196.35, 177.76, 160.11, 146.20, 141.03, 136.35, 134.83, 133.32, 131.73, 130.42, 129.74, 129.44, 129.00, 127.83, 127.75, 124.46, 123.92, 123.19, 122.91, 112.92, 110.23, 48.16, 44.67, 32.41, 31.43, 28.62, 27.24, 26.18, 24.68; **HRMS**-(ESI):  $m/z$   $[\text{M}+\text{Na}]^+$  calcd for  $\text{C}_{31}\text{H}_{30}\text{Cl}_2\text{N}_2\text{O}_3\text{SNa}$  (603.12); Anal calcd for  $\text{C}_{31}\text{H}_{30}\text{Cl}_2\text{N}_2\text{O}_3\text{S}$  (581.55): C, 64.03; H, 5.20; N, 4.82; S, 5.51; found: C, 64.21; H, 5.32; N, 4.98; S, 5.46

**Table S1.** The cytotoxicity of aplysinopsin (**10**) and its analogs **3c-g**, **4b-g** and **5a-g** against different cell lines. The data are represented as cell death percent relative to doxorubicin at 100ppm for 48 h. The data are expressed as mean  $\pm$ SD

| Compounds<br>No.   | HCT-116 | MCF-7          | PC3              | A549                           | HepG2          |
|--------------------|---------|----------------|------------------|--------------------------------|----------------|
| 3c                 | NA      | NA             | 91.03 $\pm$ 6.8  | NA                             | NA             |
| 3d                 | NA      | NA             | 79.6 $\pm$ 3.2   | NA                             | NA             |
| 3e                 | NA      | NA             | 99.06 $\pm$ 0.56 | <b>75.2<math>\pm</math>8.2</b> | NA             |
| 3f                 | NA      | NA             | 34 $\pm$ 4.9     | NA                             | NA             |
| 3g                 | NA      | NA             | NA               | NA                             | NA             |
| 4b                 | NA      | NA             | 99.5 $\pm$ 1.1   | NA                             | NA             |
| 4c                 | NA      | NA             | 98.6 $\pm$ 1.5   | NA                             | NA             |
| 4d                 | NA      | NA             | 87.21 $\pm$ 4.9  | NA                             | NA             |
| 4e                 | NA      | NA             | 87.86 $\pm$ 8.8  | NA                             | NA             |
| 4f                 | NA      | NA             | 65.8 $\pm$ 5.4   | NA                             | NA             |
| 4g                 | NA      | NA             | 61 $\pm$ 0.98    | NA                             | NA             |
| 5a                 | NA      | 76.2 $\pm$ 2.5 | 91.31 $\pm$ 8.8  | 76 $\pm$ 2.5                   | NA             |
| 5b                 | NA      | NA             | 99.56 $\pm$ 0.25 | NA                             | NA             |
| 5c                 | NA      | NA             | 81.35 $\pm$ 1.1  | NA                             | NA             |
| 5d                 | NA      | NA             | 91.89 $\pm$ 6.3  | NA                             | NA             |
| 5e                 | NA      | NA             | NA               | NA                             | NA             |
| 5f                 | NA      | NA             | 84.7 $\pm$ 5.5   | NA                             | NA             |
| 5g                 | NA      | NA             | NA               | NA                             | NA             |
| Aplysinopsin<br>10 | NA      | NA             | 100.16 $\pm$ 0.3 | NA                             | 99.2 $\pm$ 0.2 |



**Table S2.** The IC<sub>50</sub> of aplysinopsin (**10**) and its analogs **3c-g**, **4b-g** and **5a-g** against PC3 cell line. The data are expressed as mean  $\pm$ SD

| Compounds No.              | IC <sub>50</sub> $\mu$ M | Compounds No. | IC <sub>50</sub> $\mu$ M |
|----------------------------|--------------------------|---------------|--------------------------|
| 3c                         | 0.133 $\pm$ 0.17         | 4f            | 0.151 $\pm$ 0.13         |
| 3d                         | 0.113 $\pm$ 0.12         | 4g            | 0.154 $\pm$ 0.05         |
| 3e                         | 0.086 $\pm$ 0.08         | 5a            | 0.056 $\pm$ 0.3          |
| 3f                         | ND                       | 5b            | 0.079 $\pm$ 0.24         |
| 3g                         | ND                       | 5c            | 0.103 $\pm$ 0.025        |
| 4b                         | 0.037 $\pm$ 0.43         | 5d            | 0.112 $\pm$ 0.1          |
| 4c                         | 0.073 $\pm$ 0.15         | 5e            | ND                       |
| 4d                         | 0.090 $\pm$ 0.074        | 5f            | 0.098 $\pm$ 0.8          |
| 4e                         | 0.075 $\pm$ 0.37         | 5g            | ND                       |
| Aplysinopsin ( <b>10</b> ) | 0.107 $\pm$ 0.38         |               |                          |

ND: not detected

**Table S3.** Apoptosis phase after treatment of PC3 cells with Aplysinopsin analogs for 24h. Results are represented as the mean of three independent experiments.

| <b>Sample</b>     | <b>Early apoptosis</b> | <b>Late apoptosis</b> | <b>Necrosis</b> | <b>Total cell death</b> |
|-------------------|------------------------|-----------------------|-----------------|-------------------------|
| untreated         | 0.69±0.37              | 0.3± 0.22             | 1.48±0.37       | 2.48±1.32               |
| Aplysinopsin (10) | 13.08±3.13             | 8.64± 2.89            | 4.84± 2.63      | 26.56±3.96              |
| 4b                | 12.42±5.91             | 13.99±7.53            | 4.66± 2.62      | 31.07± 7.55             |
| 4c                | 14.17± 5.10            | 23.24±8.78            | 5.66± 3.17      | 43.07±7.02              |
| 4e                | 9.81±3.74              | 11.41±3.29            | 7.49±3.46       | 28.71±3.89              |
| 5a                | 8.61±0.49              | 16.01±3.98            | 11.53±3.53      | 36.15±6.04              |
| 5b                | 9.68±3.78              | 9.53±2.56             | 7.22±2.40       | 26.43±4.36              |

**Table S4.** Gene expression analysis (expressed as fold Change B-actin) of active compounds on Prostate cancer cell line. Values are expressed as Mean $\pm$ SD

| Treatment         | Gene expression (Fold change) |                    |                   |                   |
|-------------------|-------------------------------|--------------------|-------------------|-------------------|
|                   | P53                           | Caspase-3          | Bax               | Bcl-2             |
| untreated         | 1.101 $\pm$ 0.042             | 1.012 $\pm$ 0.039  | 1.110 $\pm$ 0.210 | 1.023 $\pm$ 0.121 |
| Doxorubicin       | 3.934 $\pm$ 0.313             | 5.032 $\pm$ 0.214  | 3.234 $\pm$ 0.104 | 0.121 $\pm$ 0.048 |
| Aplysinopsin (10) | 1.863 $\pm$ 0.122             | 1.243 $\pm$ 0.121  | 1.671 $\pm$ 0.114 | 0.917 $\pm$ 0.065 |
| 4b                | 2.154 $\pm$ 0.146             | 3.762 $\pm$ 0.212  | 2.765 $\pm$ 0.094 | 0.443 $\pm$ 0.113 |
| 4c                | 2.012 $\pm$ 0.241             | 1.981 $\pm$ 0.123  | 2.876 $\pm$ 0.106 | 0.456 $\pm$ 0.123 |
| 4e                | 1.321 $\pm$ 0.231             | 1.542 $\pm$ 0.123  | 1.353 $\pm$ 0.107 | 0.972 $\pm$ 0.016 |
| 5a                | 1.764 $\pm$ 0.124             | 2.167 $\pm$ 0.211  | 1.985 $\pm$ 0.121 | 0.345 $\pm$ 0.054 |
| 5b                | 1.623 $\pm$ 0.211             | 1.4123 $\pm$ 0.217 | 1.541 $\pm$ 0.132 | 0.756 $\pm$ 0.073 |

**Table S5.** Cell cycle phase distribution after treatment of PC3 cells with Aplysinopsin analogs for 24h. Results are represented as the mean of three independent experiments.

| <b>Sample</b>     | <b>% G0-G1</b> | <b>% S</b> | <b>% G2/M</b> | <b>% Pre-G1</b> |
|-------------------|----------------|------------|---------------|-----------------|
| untreated         | 51.39±15.49    | 28.66±5.72 | 19.95±8.07    | 2.48±2.19       |
| Aplysinopsin (10) | 55.91±7.78     | 27.44±4.86 | 16.65±3.84    | 26.56±7.07      |
| 4b                | 44.36±10.19    | 39.51±8.78 | 16.13±1.67    | 31.07±2.96      |
| 4c                | 57.12±3.32     | 33.89±3.27 | 8.99±1.99     | 43.07±2.78      |
| 4e                | 59.84±8.72     | 26.58±6.17 | 13.58±3.28    | 28.71±6.38      |
| 5a                | 47.58±4.79     | 43.41±6.15 | 9.01±4.41     | 36.15±7.12      |
| 5b                | 52.94±10.19    | 40.76±8.78 | 6.3±1.67      | 26.43±2.96      |

**Table S6.** The molecular docking result of aplysinopsin (**10**), and its analogs **4b**, **4c**, **4e**, **5a**, and **5b**

| Comp. No.       | Score Kcal/mol | Moieties from the compound | Amino acid residues    | Type of interaction |
|-----------------|----------------|----------------------------|------------------------|---------------------|
| LBM             | -12.6          | C=O                        | GLN99, ASN143          | Conventional H-bond |
|                 |                | O=S=O                      | GLY145                 |                     |
|                 |                | NH of pyrrole              | ASP103                 |                     |
|                 |                | C=C of pyrrole             | ALA100                 |                     |
|                 |                | N of piprazine             | ASP111                 | Attractive charge   |
|                 |                | Phenyl                     | PHE104                 |                     |
|                 |                | Pyran (C-O-C)              | TYP202                 | Pi-Pi               |
|                 |                | Phenyl                     | ARG146, ALA149, MET115 |                     |
|                 |                | Pyrrole                    | VAL148                 | Pi-Alkyl            |
|                 |                | CH <sub>3</sub>            | VAL156, PHE112         |                     |
|                 |                | COCH <sub>3</sub>          | ARG107                 | Conventional H-bond |
|                 |                | C=O                        | ARG107                 |                     |
|                 |                | NH                         | ARG207                 |                     |
|                 |                | C=C of pyrrole ring        | ARG207                 |                     |
| <b>4b</b>       | -8.3           | Pyrrole ring               | ARG207, ASP103         | Attractive charge   |
|                 |                | Phenyl                     | ASP103                 |                     |
|                 |                | Phenyl                     | TRY202                 | Pi-Pi               |
|                 |                | CH <sub>3</sub>            | TRY108, VAL148         |                     |
|                 |                | Phenyl                     | VAL148                 | Pi-Alkyl            |
|                 |                | Phenyl                     | ALA100                 |                     |
|                 |                | NH                         | ARG207                 | Pi-sigma            |
|                 |                | COCH <sub>3</sub>          | ALA100                 |                     |
|                 |                | Thiophene ring             | ARG107, APS103, ARG207 | Conventional H-bond |
|                 |                | Pyrrole ring               | ASP103                 |                     |
| <b>4c</b>       | -8.7           | Thiophene ring             | MET206                 | Attractive charge   |
|                 |                | Phenyl                     | TYR202, GLY145         |                     |
|                 |                | Phenyl                     | ALA100, VAL148         | Pi-Pi               |
|                 |                | Methyl                     | ARG146                 |                     |
|                 |                | COCH <sub>3</sub>          | GLY145                 | Pi-Alkyl            |
|                 |                | CH <sub>2</sub>            | ASP103                 |                     |
|                 |                | Phenyl                     | ARG207                 | Conventional H-bond |
|                 |                | Benzopyrrole               | TYR202                 |                     |
|                 |                | Thiophene                  | TYR108                 | Attractive charge   |
|                 |                | CH <sub>3</sub>            | TYR108, PHE104         |                     |
| <b>4e</b>       | -9.2           | Hexane                     | TYR108                 | Pi-Pi               |
|                 |                | Phenyl                     | VAL148, ALA100         |                     |
|                 |                | NH                         | TYR202                 | Pi-Alkyl            |
|                 |                | Cl                         | ARG107                 |                     |
|                 |                | C=O                        | ALA100                 | Conventional H-bond |
|                 |                | NH                         | ASP103, ARG207         |                     |
|                 |                | Cl                         | TYR108                 | Attractive charge   |
|                 |                | Phenyl                     | VAL148, ALA100, TYR202 |                     |
|                 |                | Pyrrol                     | ALA100, TYR202         | Pi-Alkyl            |
|                 |                | Phenyl                     | ASP103, ARG207         |                     |
| <b>5a</b>       | -8.9           | Phenyl                     | VAL148, ALA100         | Attractive charge   |
|                 |                | Phenyl                     | VAL148, ALA100         |                     |
|                 |                | CH <sub>3</sub>            | ARG148                 | Pi-Alkyl            |
|                 |                | Phenyl and Pyrrol          | TYR202                 |                     |
| <b>5b</b>       | -8.5           | CH <sub>3</sub>            | TYR108                 | Pi-Pi               |
|                 |                | Pyrrole ring               | ARG207                 |                     |
|                 |                |                            |                        | Pi-Sigma            |
|                 |                |                            |                        |                     |
| <b>Aplysino</b> | -8.7           | Pyrrole ring               | ARG207                 | Conventional H-bond |

|                  |                   |                |                   |
|------------------|-------------------|----------------|-------------------|
| <b>psin (10)</b> | Imidazolidine     | ARG207         |                   |
|                  | C=O               | ARG207         |                   |
|                  | N-CH <sub>3</sub> | GLY203         | Attractive charge |
|                  | Benzopyrrole      | TYR202         | Pi-Pi             |
|                  | Phenyl            | ALA100, VAL148 |                   |
|                  | Pyrrole ring      | ALA100         | Pi-Alkyl          |

---

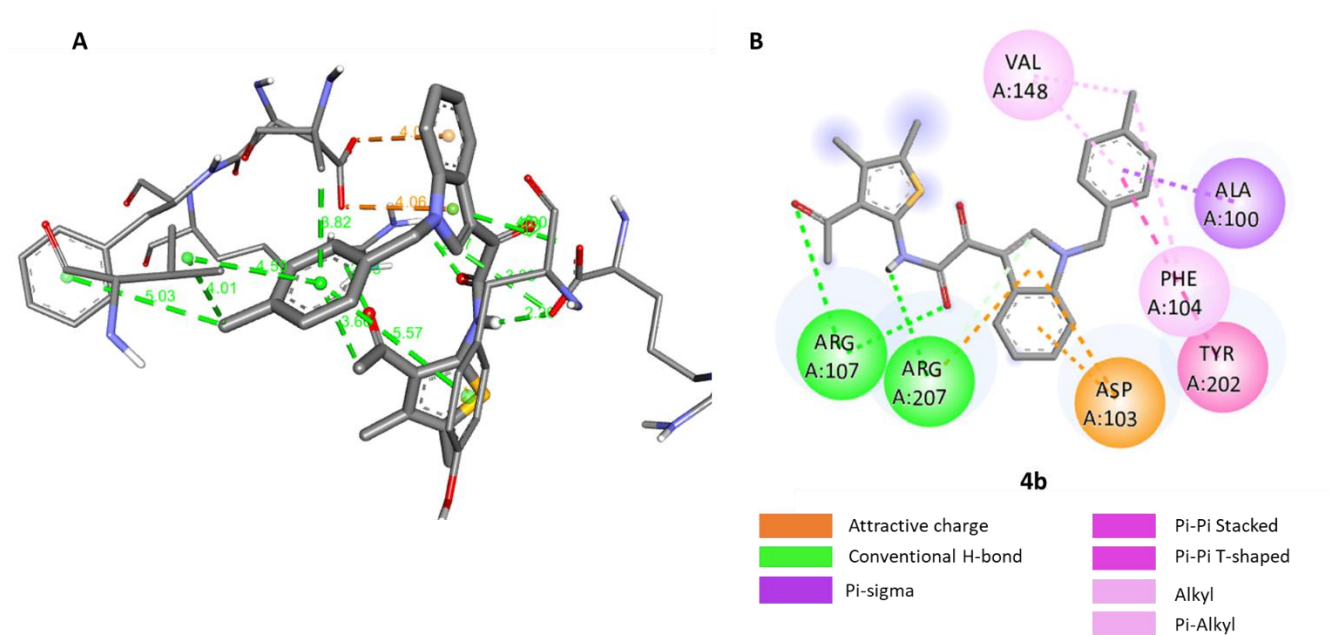

**Figure S1.** **A.** The 3D interaction of **4b** inside the binding pocket of BCL2 (PDB: 6O0K). **B.** The 2D interaction of **4b** inside the binding pocket of BCL2 (PDB: 6O0K) illustrating the formed hydrogen bonds, attractive charge, pi-pi bond, and pi-alkyl

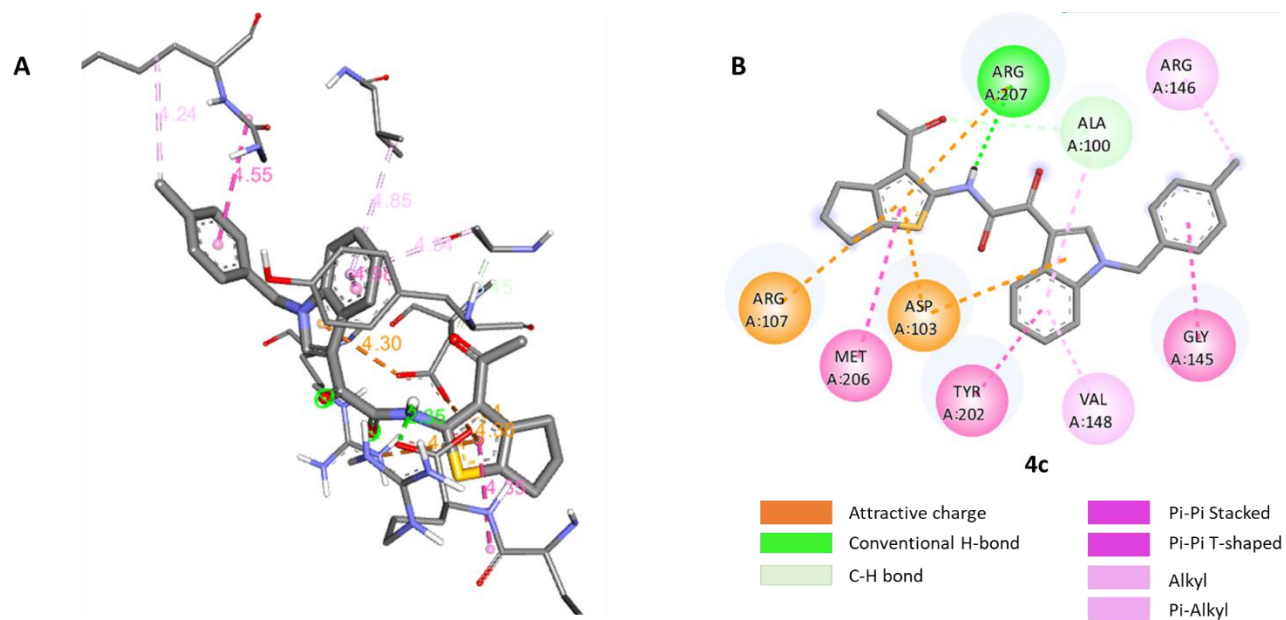

**Figure S2.** **A.** The 3D interaction of **4c** inside the binding pocket of BCL2 (PDB: 6O0K). **B.** The 2D interaction of **4c** inside the binding pocket of BCL2 (PDB: 6O0K) illustrating the formed hydrogen bonds, attractive charge, pi-pi bond, and pi-alkyl

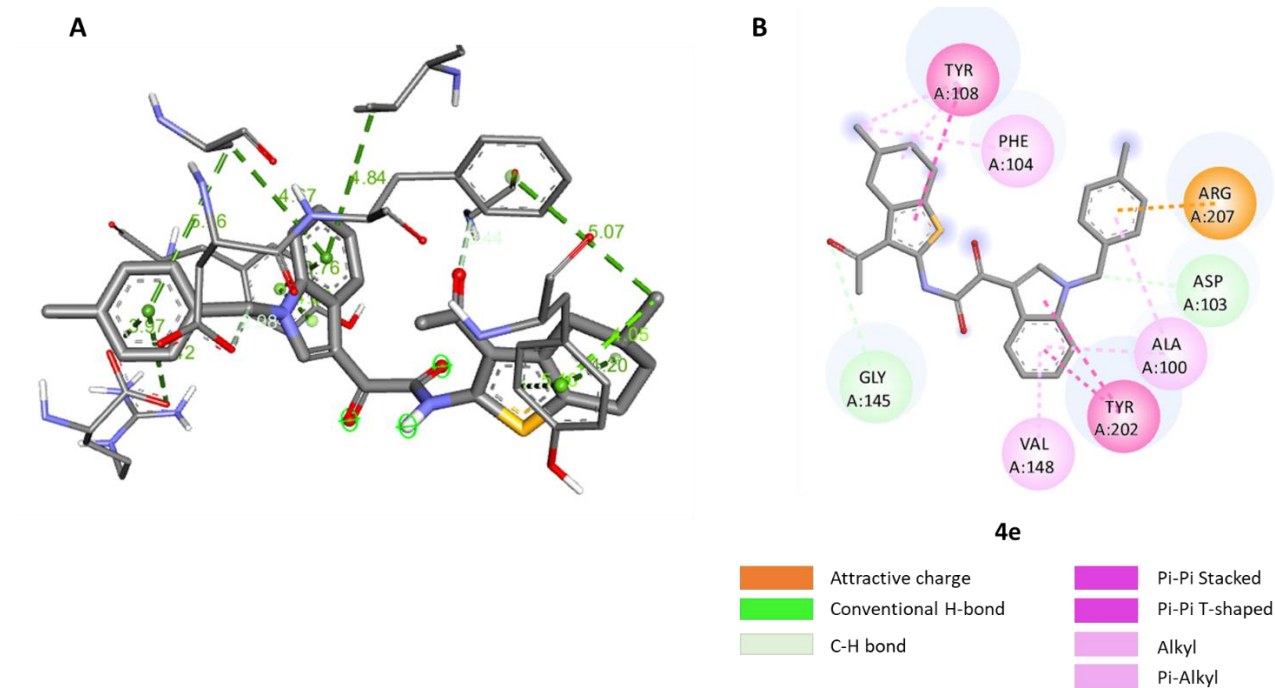

**Figure S3. A.** The 3D interaction of **4e** inside the binding pocket of BCI2 (PDB: 6O0K). **B.** The 2D interaction of **4e** inside the binding pocket of BCI2 (PDB: 6O0K) illustrating the formed hydrogen bonds, attractive charge, pi-pi bond, and pi-alkyl

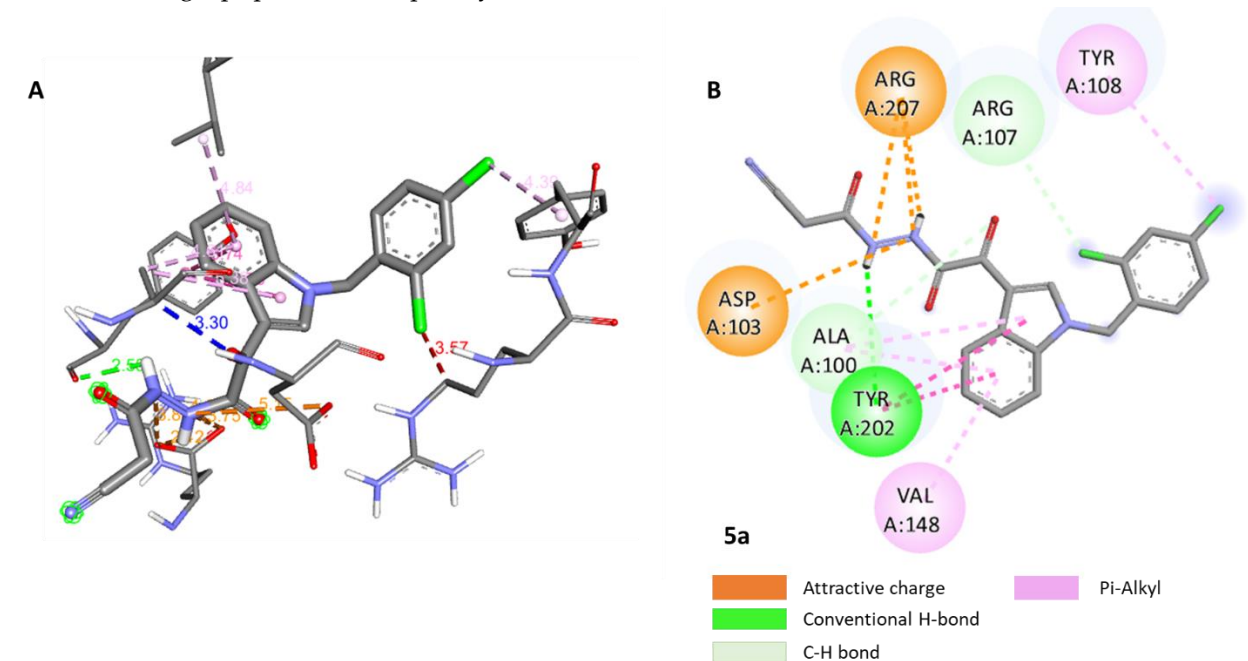

**Figure S4. A.** The 3D interaction of **5a** inside the binding pocket of BCI2 (PDB: 6O0K). **B.** The 2D interaction of **5a** inside the binding pocket of BCI2 (PDB: 6O0K) illustrating the formed hydrogen bonds, attractive charge, pi-pi bond, and pi-alkyl



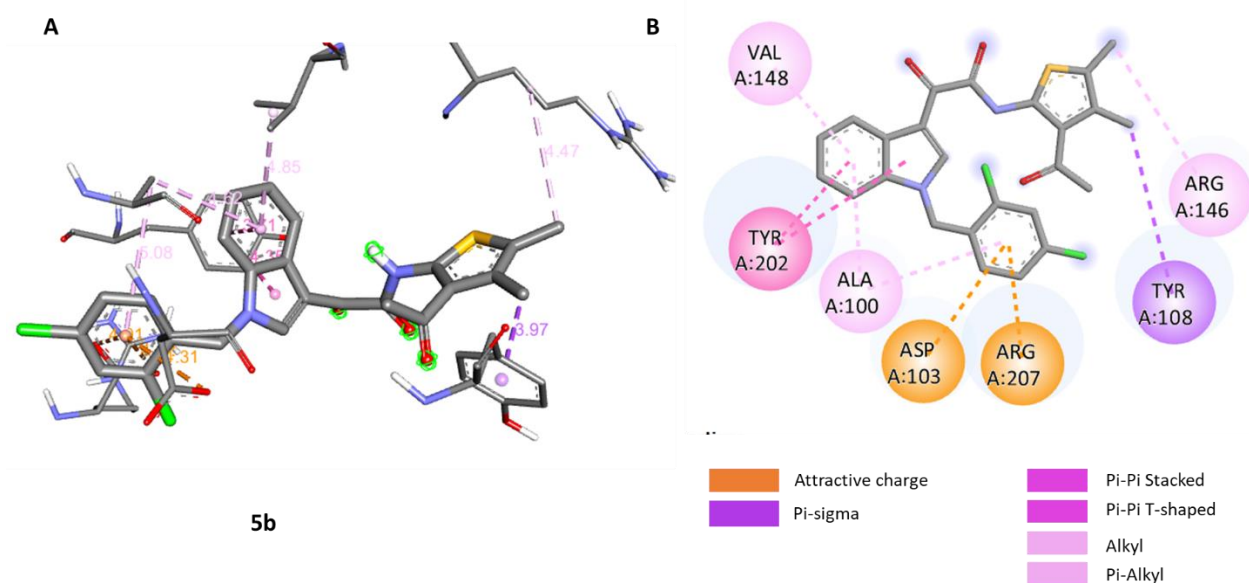

**Figure S5.** **A.** The 3D interaction of **5b** inside the binding pocket of BCL2 (PDB: 6O0K). **B.** The 2D interaction of **5b** inside the binding pocket of BCL2 (PDB: 6O0K) illustrating the formed attractive charge, pi-pi bond, and pi-alkyl

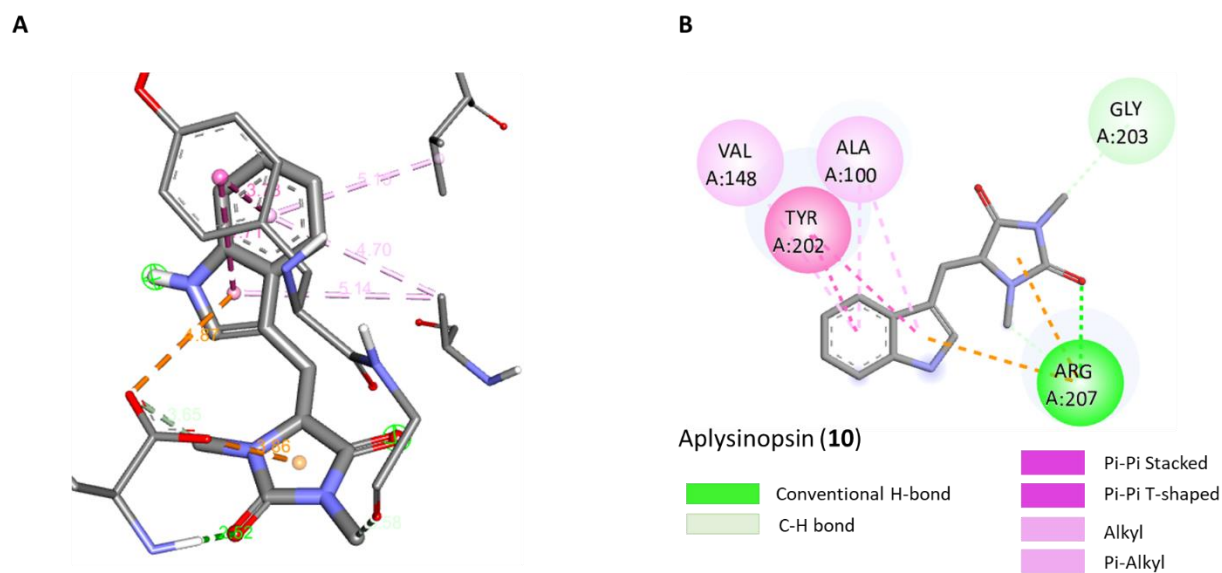

**Figure S6.** **A.** The 3D interaction of aplysinopsin (10) inside the binding pocket of BCL2 (PDB: 6O0K). **B.** The 2D interaction of aplysinopsin (10) inside the binding pocket of BCL2 (PDB: 6O0K) illustrating the formed hydrogen bonds, attractive charge, pi-pi bond, and pi-alkyl
