# Supplementary material for: Synthetic Analogs of Marine Alkaloid Aplysinopsin Suppress Anti-Apoptotic Protein BCL2 in Prostate Cancer
Source: MDPI journal article supplement (doi:10.3390/molecules28010109), 2022-12-23
Supplement: s1 [file s1]

L2CM Salma EE-65  
Salma EE-65

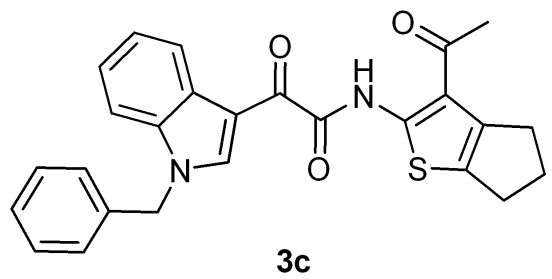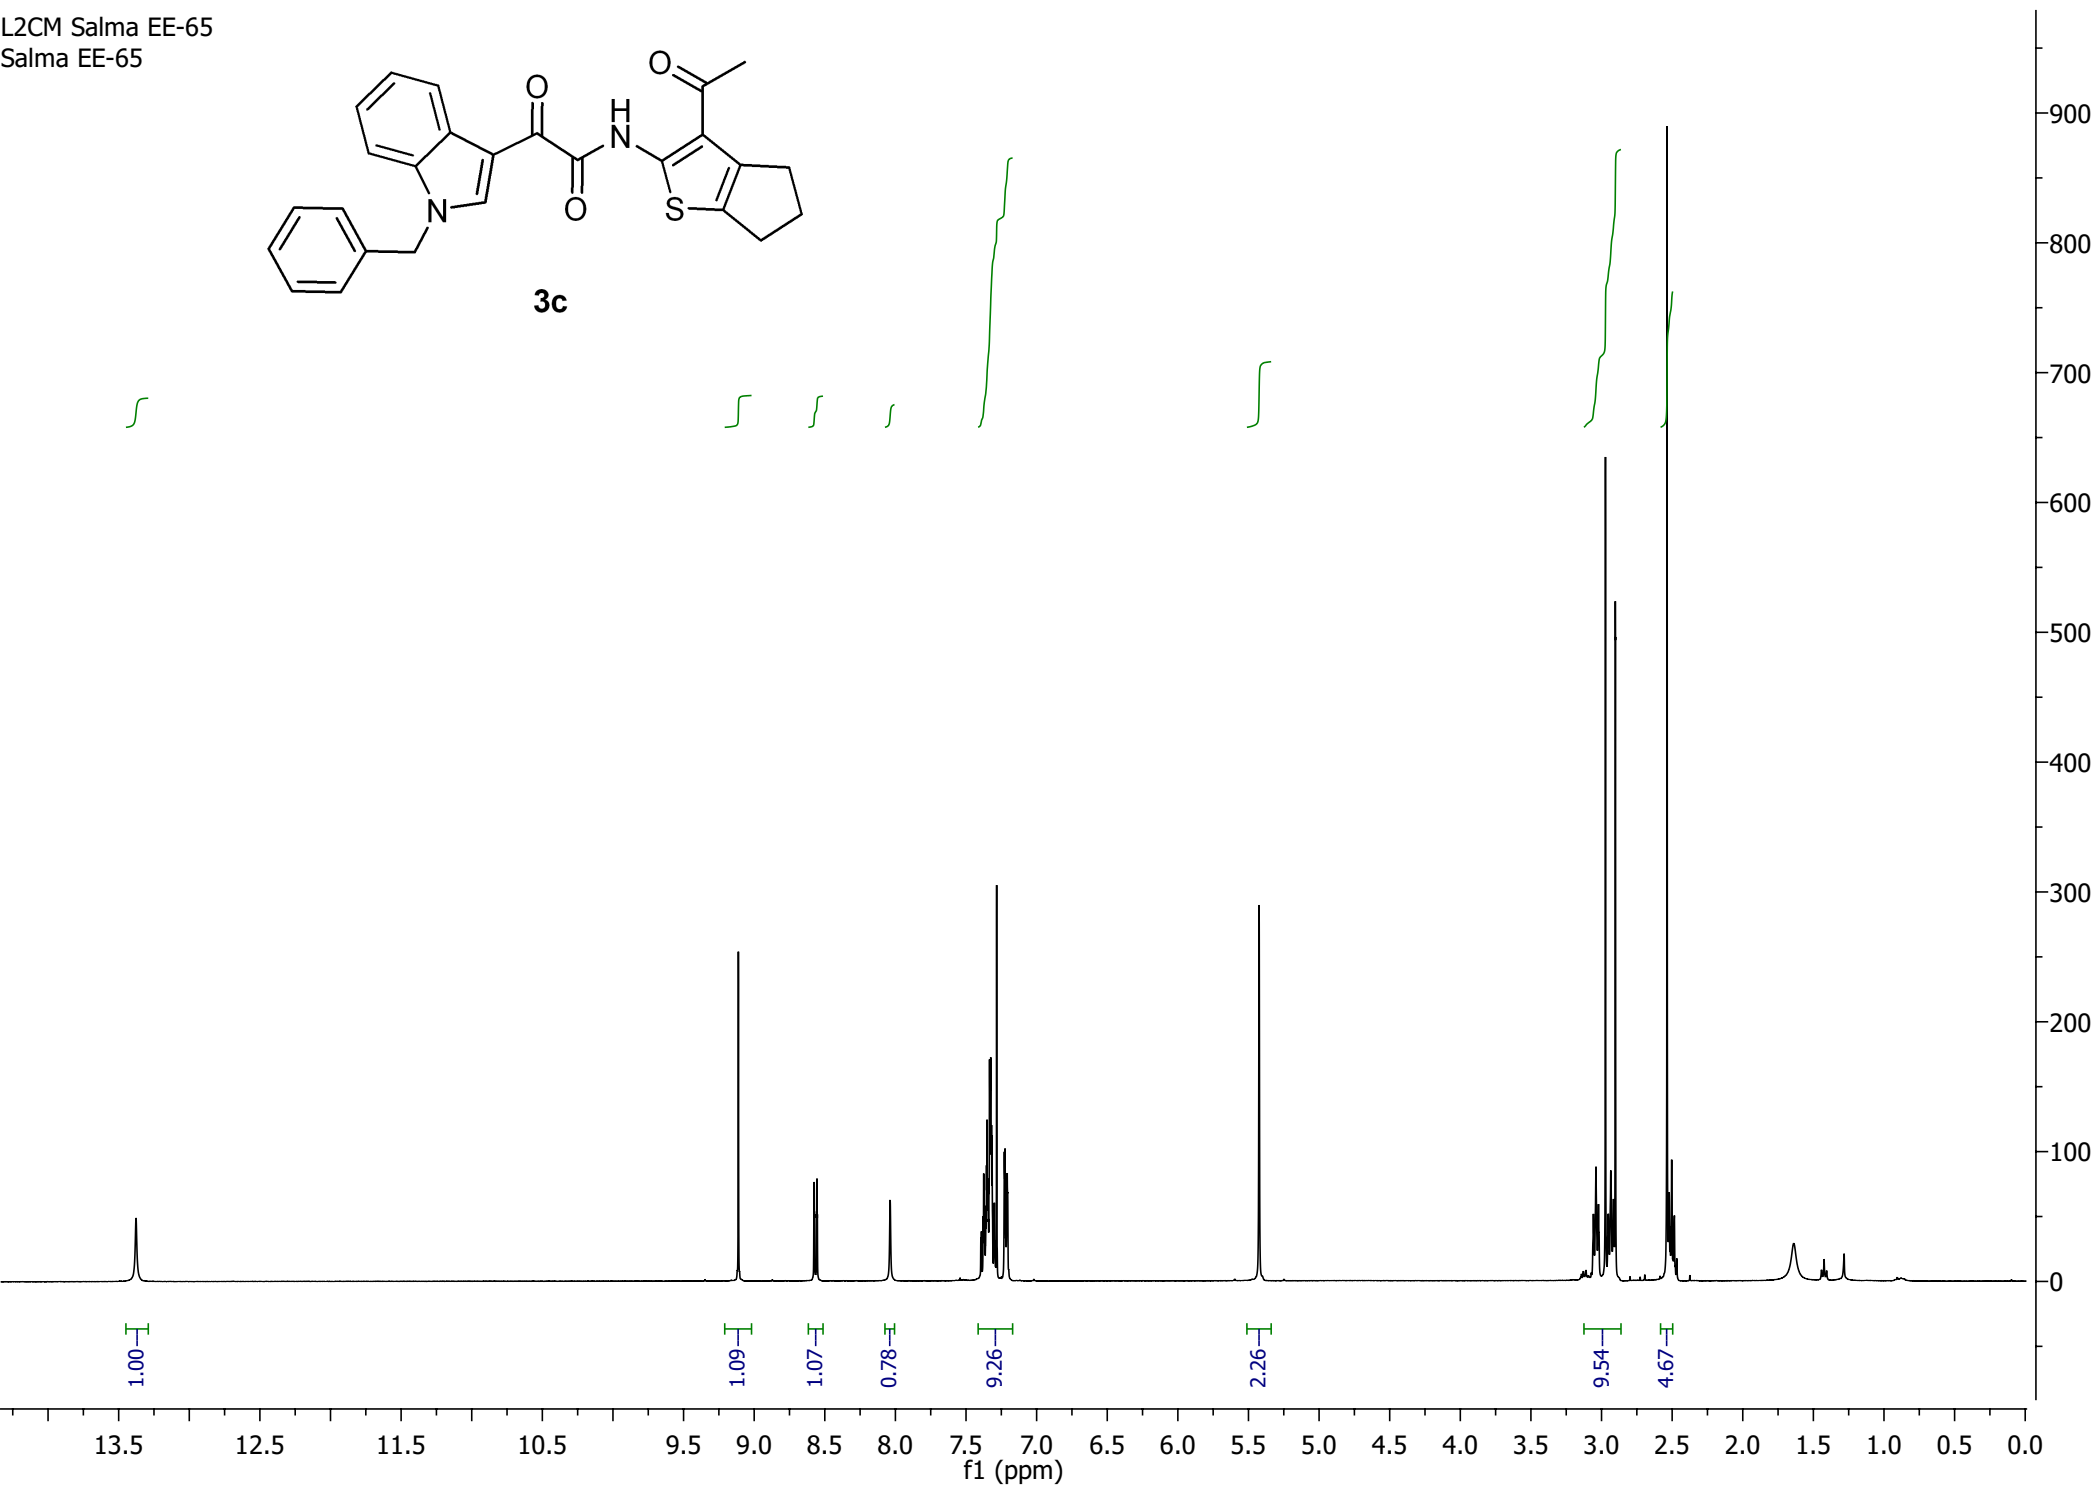

L2CM Salma EE-65 13C CPD

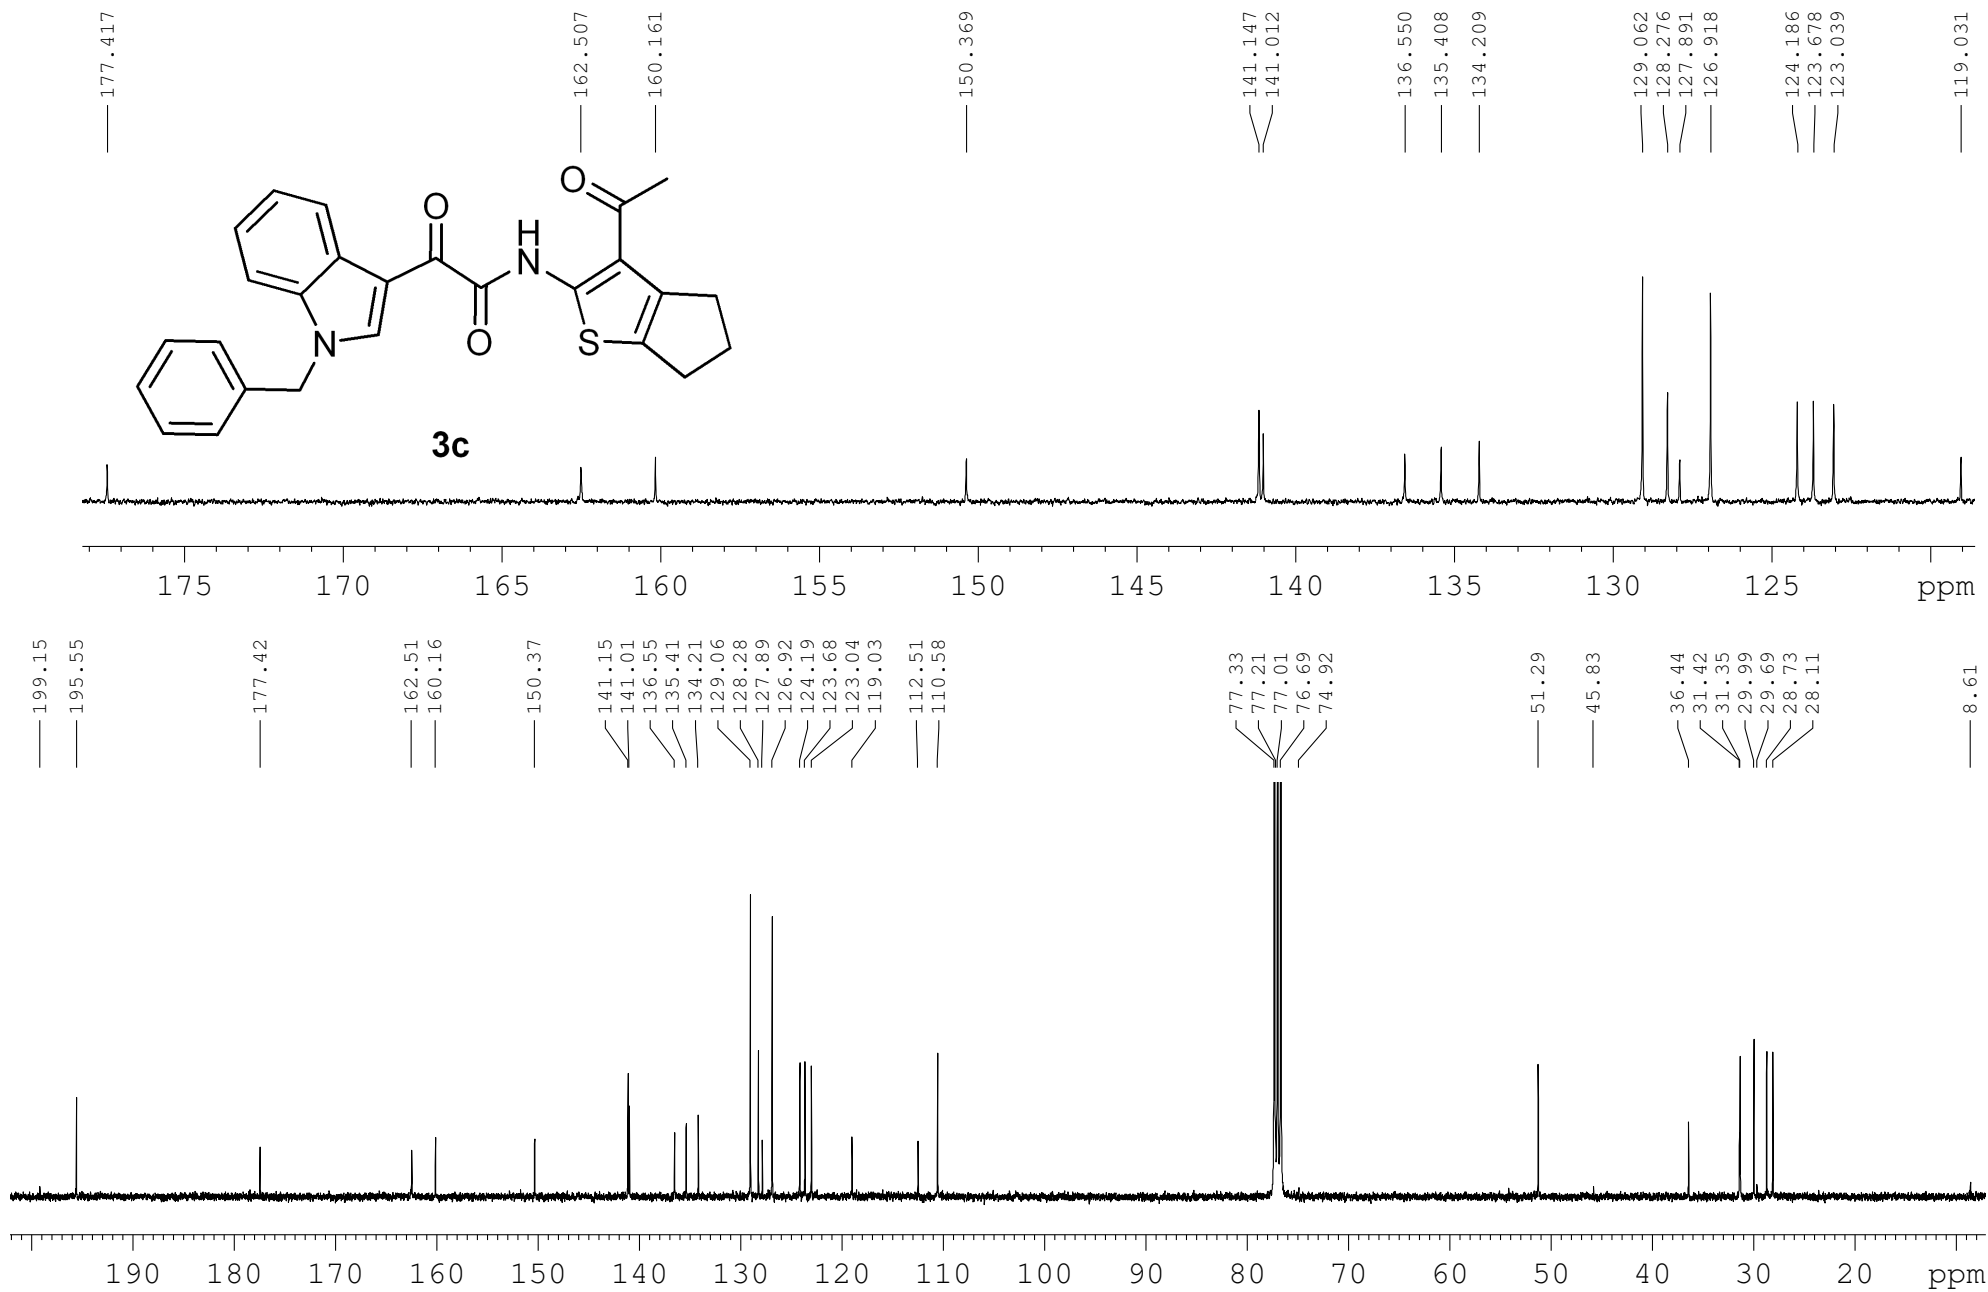

# Mass Spectrum SmartFormula Report

## Analysis Info

Analysis Name D:\Data\2018\180920000002.d  
Method Tuneposlow.m  
Sample Name 180913799///EE65  
Comment CH2Cl2/MeOH

Acquisition Date 9/20/2018 3:05:08 PM

Operator fabien  
Instrument micrOTOF-Q 228888.00098

## Acquisition Parameter

|             |            |                       |           |                  |           |
|-------------|------------|-----------------------|-----------|------------------|-----------|
| Source Type | ESI        | Ion Polarity          | Positive  | Set Nebulizer    | 1.0 Bar   |
| Focus       | Not active | Set Capillary         | 4500 V    | Set Dry Heater   | 190 °C    |
| Scan Begin  | 50 m/z     | Set End Plate Offset  | -500 V    | Set Dry Gas      | 4.0 l/min |
| Scan End    | 3000 m/z   | Set Collision Cell RF | 250.0 Vpp | Set Divert Valve | Source    |

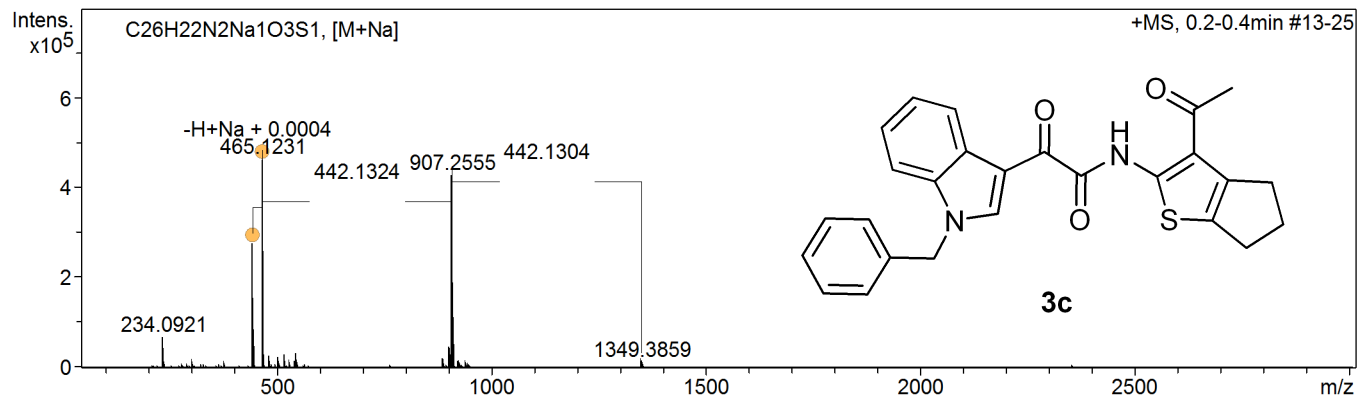

| Meas. m/z | # | Ion Formula   | m/z      | err  [mDa] | err [ppm] | mSigma | # mSigma | Score  | rdB  | e <sup>-</sup> | Conf | N-Rule |
|-----------|---|---------------|----------|------------|-----------|--------|----------|--------|------|----------------|------|--------|
| 443.1407  | 1 | C26H23N2O3S   | 443.1424 | 1.7        | 3.7       | 3.5    | 1        | 100.00 | 16.5 | even           |      | ok     |
| 465.1231  | 1 | C26H22N2NaO3S | 465.1243 | 1.3        | 2.7       | 1.7    | 1        | 100.00 | 16.5 | even           |      | ok     |

L2CM Salma EE-45

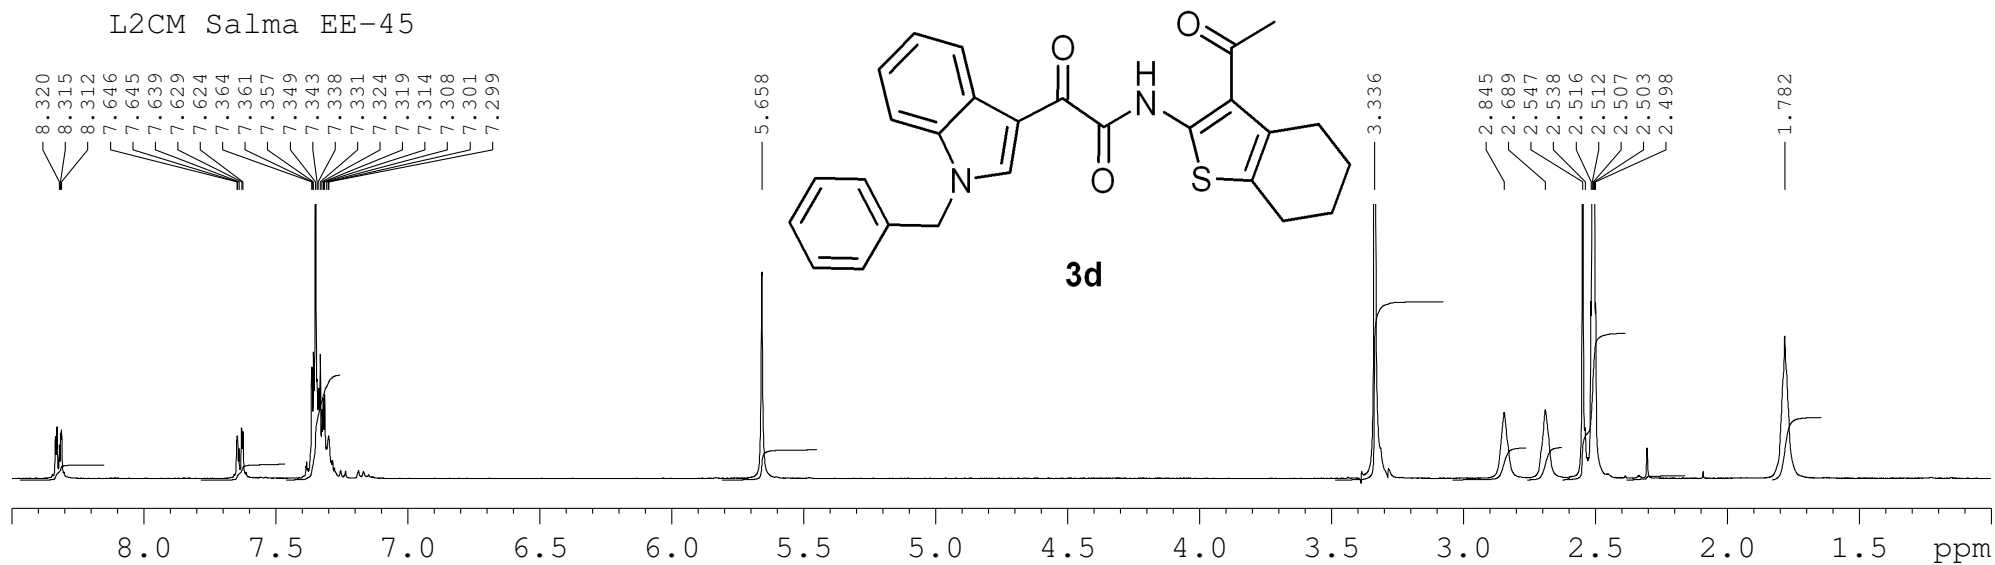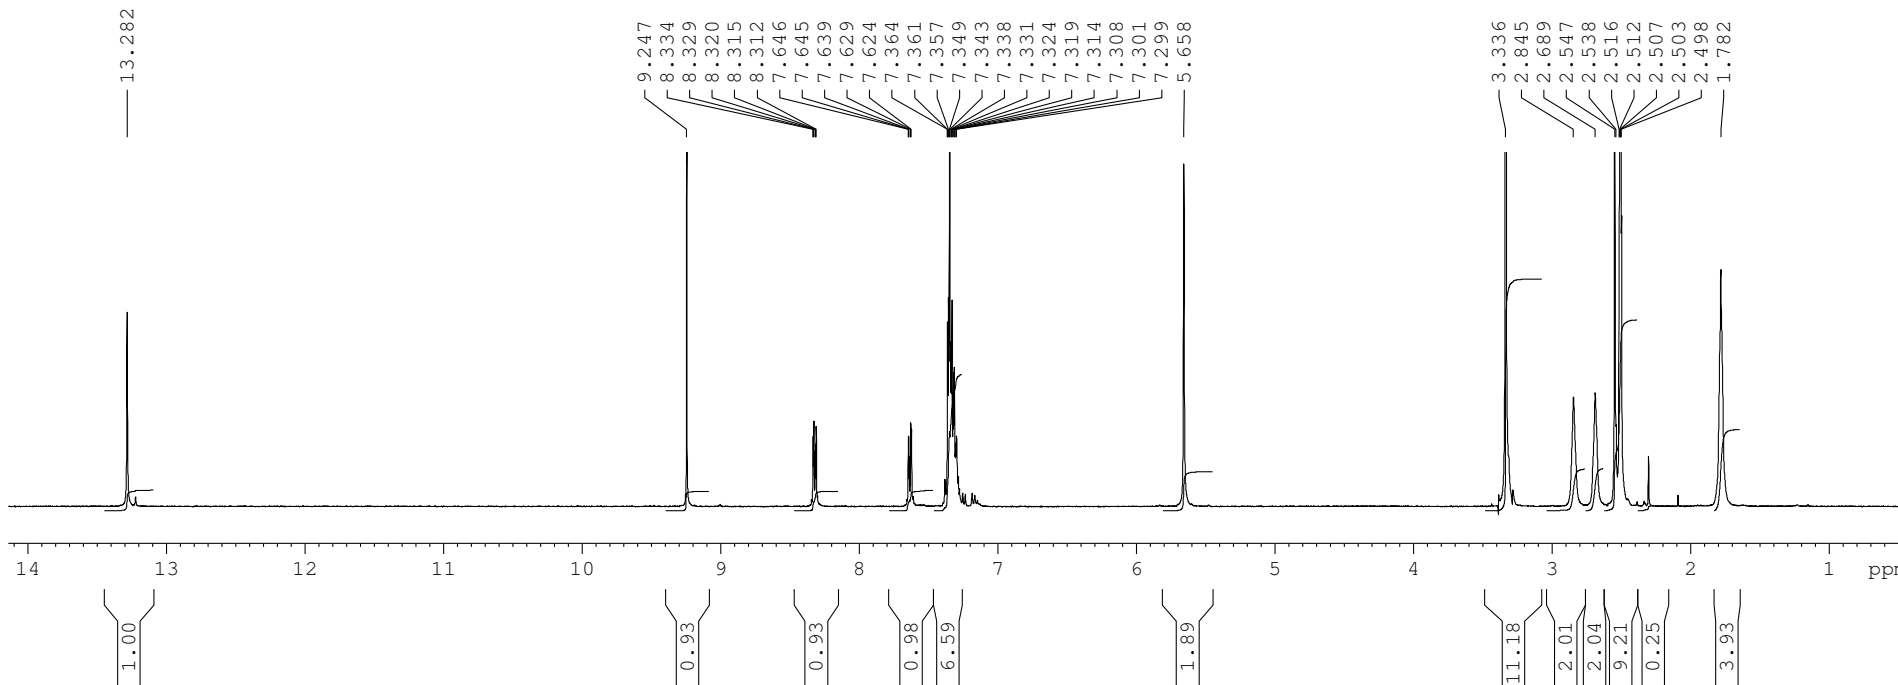

L2CM Salma EE-45 13cpd

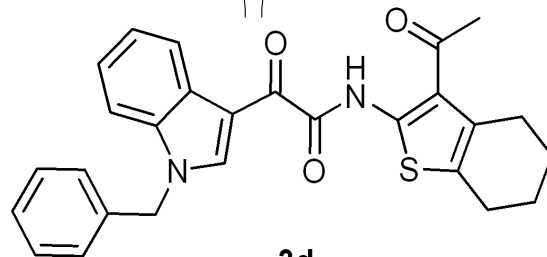

3d

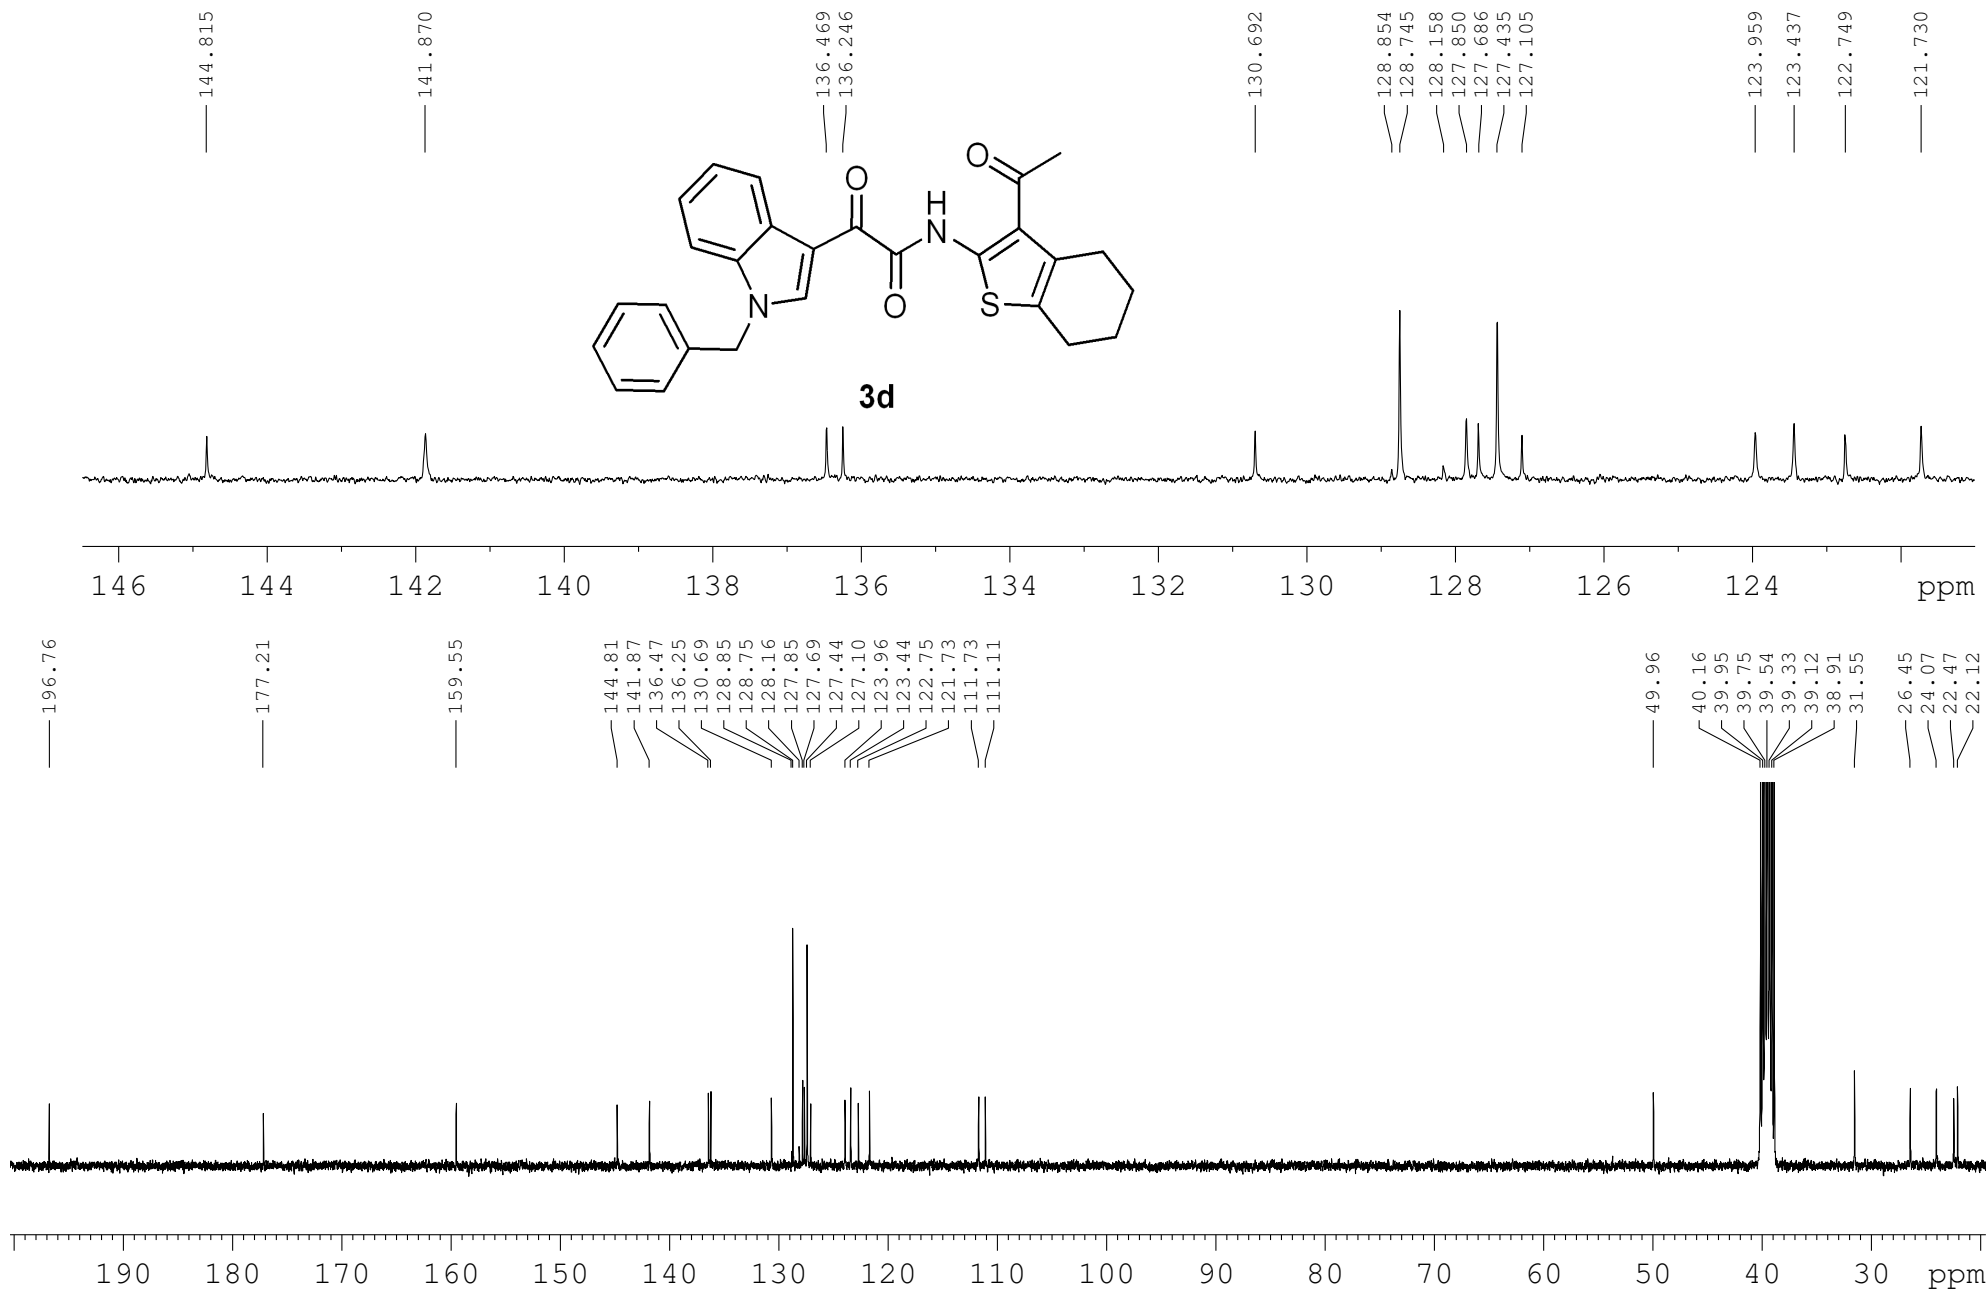

# Mass Spectrum SmartFormula Report

## Analysis Info

Analysis Name D:\Data\2018\180920000003.d  
Method Tuneposlow.m  
Sample Name 180913800///EE45  
Comment CH2Cl2/MeOH

Acquisition Date 9/20/2018 3:21:17 PM

Operator fabien  
Instrument micrOTOF-Q 228888.00098

## Acquisition Parameter

|             |            |                       |           |                  |           |
|-------------|------------|-----------------------|-----------|------------------|-----------|
| Source Type | ESI        | Ion Polarity          | Positive  | Set Nebulizer    | 1.0 Bar   |
| Focus       | Not active | Set Capillary         | 4500 V    | Set Dry Heater   | 190 °C    |
| Scan Begin  | 50 m/z     | Set End Plate Offset  | -500 V    | Set Dry Gas      | 4.0 l/min |
| Scan End    | 3000 m/z   | Set Collision Cell RF | 250.0 Vpp | Set Divert Valve | Source    |

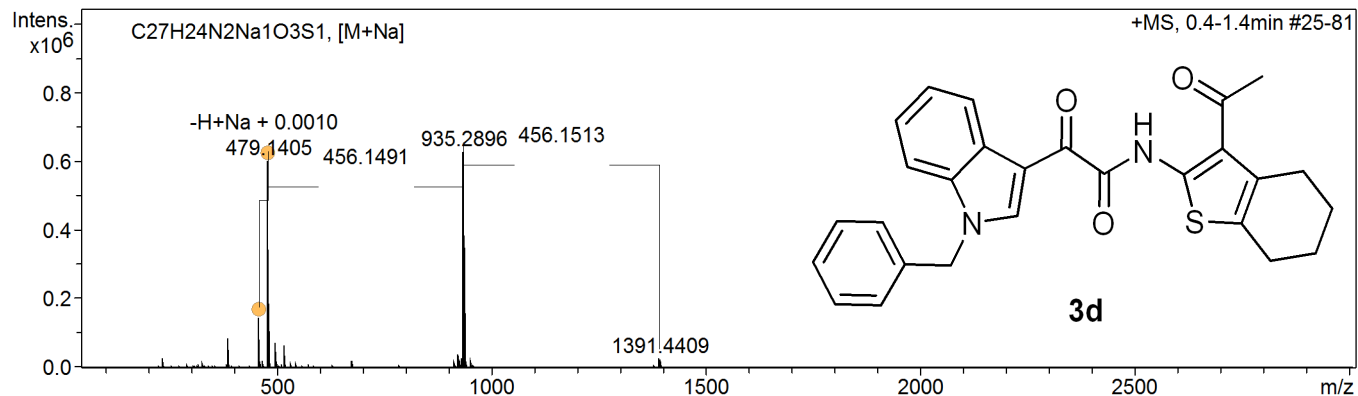

| Meas. m/z | # | Ion Formula                                                       | m/z      | err  [mDa] | err [ppm] | mSigma | # mSigma | Score  | rdb  | e <sup>-</sup> | Conf | N-Rule |
|-----------|---|-------------------------------------------------------------------|----------|------------|-----------|--------|----------|--------|------|----------------|------|--------|
| 457.1576  | 1 | C <sub>27</sub> H <sub>25</sub> N <sub>2</sub> O <sub>3</sub> S   | 457.1580 | 0.4        | 0.9       | 4.3    | 1        | 100.00 | 16.5 | even           |      | ok     |
| 479.1405  | 1 | C <sub>27</sub> H <sub>24</sub> N <sub>2</sub> NaO <sub>3</sub> S | 479.1400 | 0.6        | -1.2      | 1.5    | 1        | 100.00 | 16.5 | even           |      | ok     |

L2CM Salma AE-47

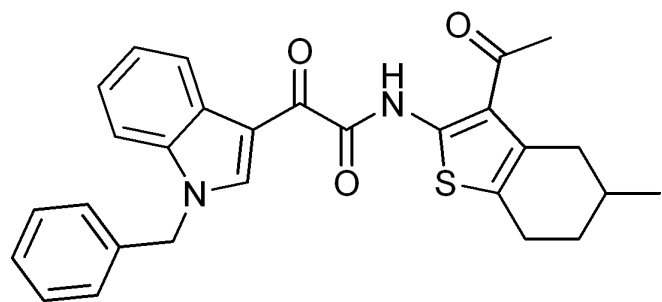

**3e**

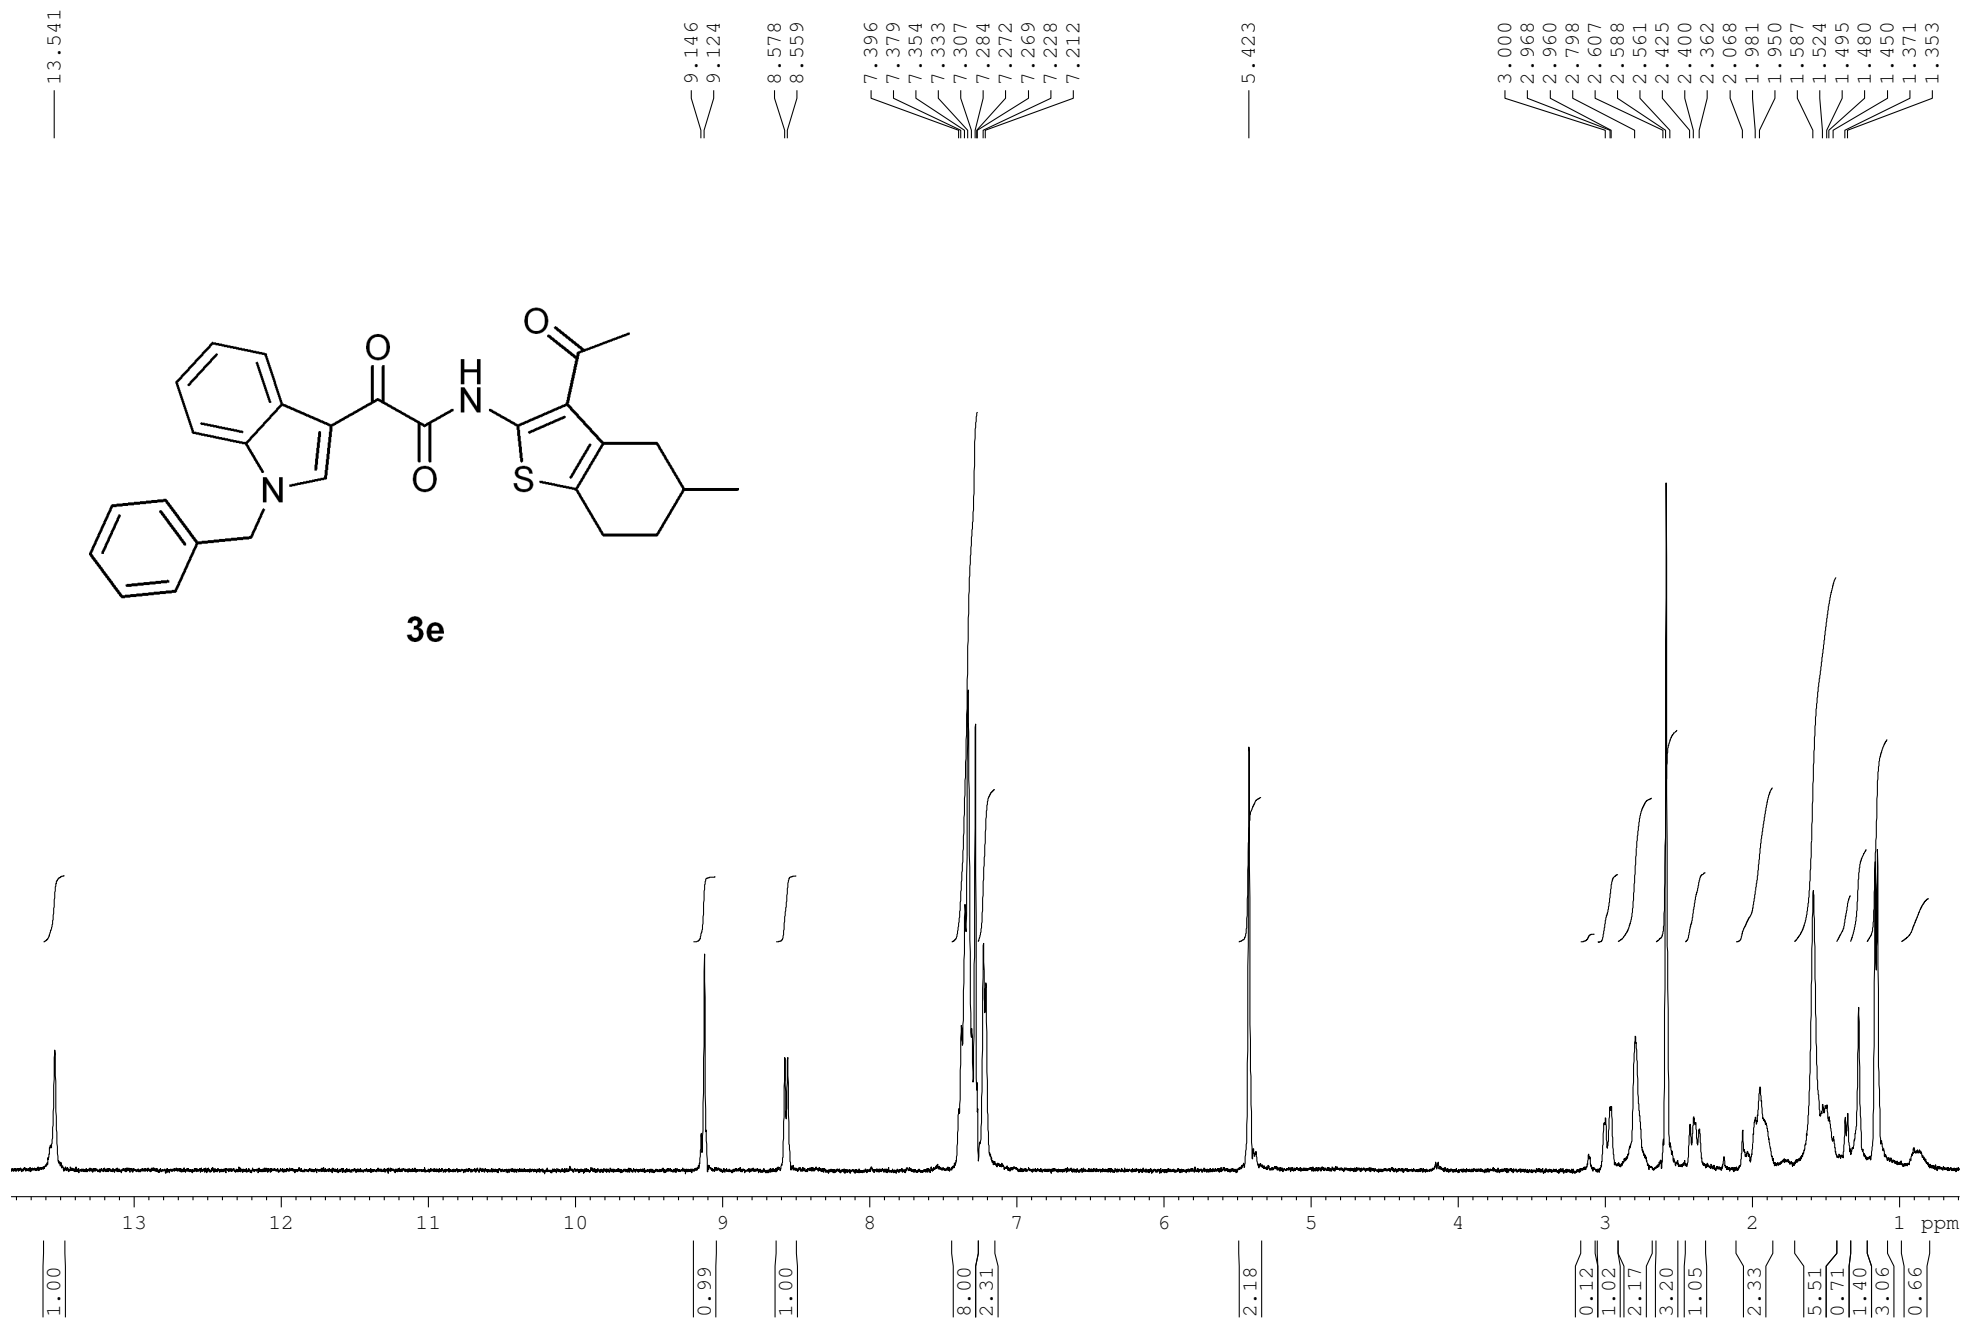

L2CM Salma EE-47 <sup>13</sup>C

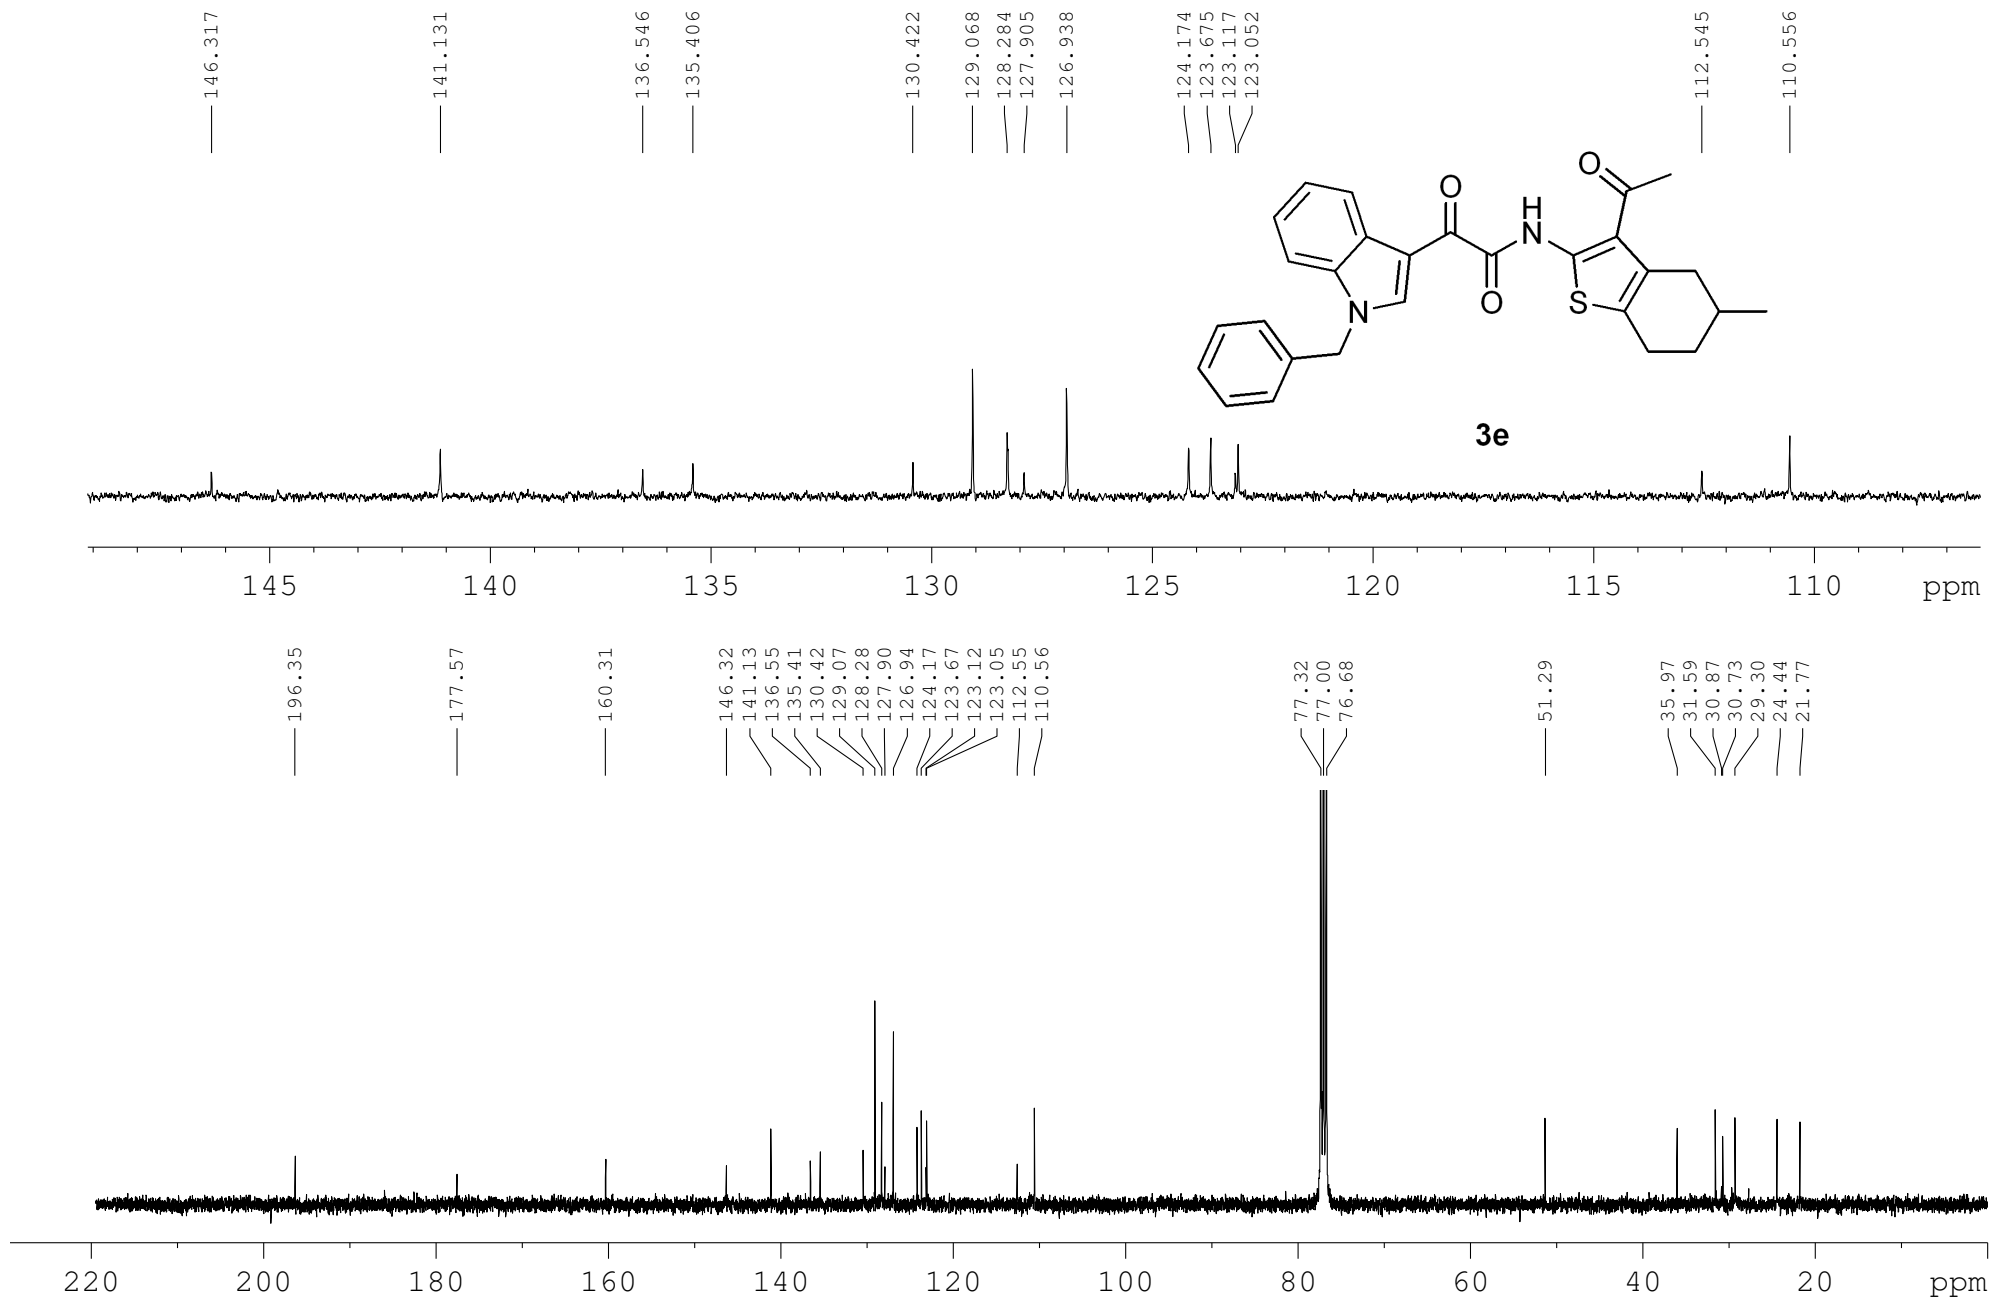



# Mass Spectrum SmartFormula Report

## Analysis Info

Analysis Name D:\Data\2018\180920000004.d  
 Method Tuneposlow.m  
 Sample Name 180913801///EE47  
 Comment CH2Cl2/MeOH

Acquisition Date 9/20/2018 3:36:36 PM

Operator fabien  
 Instrument micrOTOF-Q 228888.00098

## Acquisition Parameter

|             |            |                       |           |                  |           |
|-------------|------------|-----------------------|-----------|------------------|-----------|
| Source Type | ESI        | Ion Polarity          | Positive  | Set Nebulizer    | 1.0 Bar   |
| Focus       | Not active | Set Capillary         | 4500 V    | Set Dry Heater   | 190 °C    |
| Scan Begin  | 50 m/z     | Set End Plate Offset  | -500 V    | Set Dry Gas      | 4.0 l/min |
| Scan End    | 3000 m/z   | Set Collision Cell RF | 250.0 Vpp | Set Divert Valve | Source    |

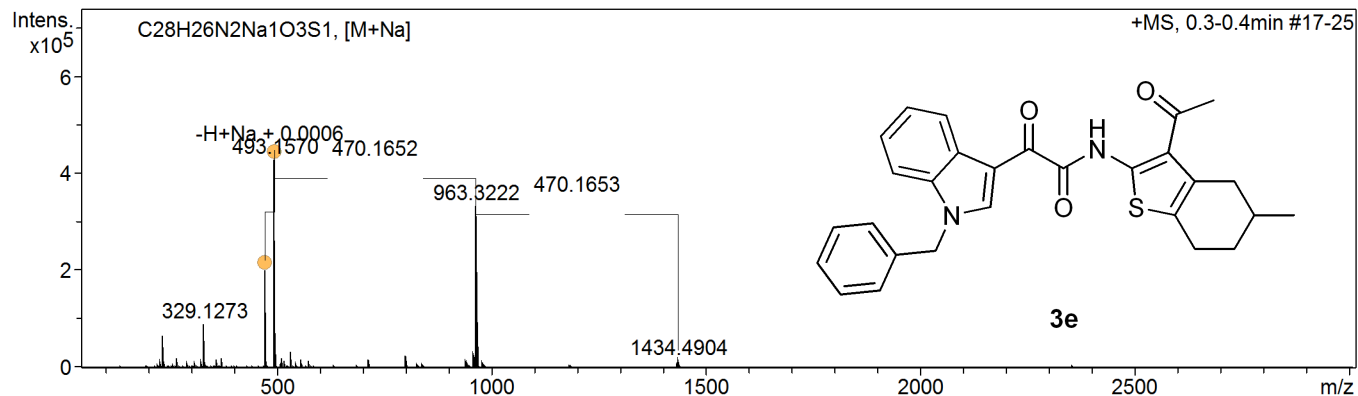

| Meas. m/z | # | Ion Formula   | m/z      | err | [mDa] | err [ppm] | mSigma | # mSigma | Score  | rdB  | e <sup>-</sup> | Conf | N-Rule |
|-----------|---|---------------|----------|-----|-------|-----------|--------|----------|--------|------|----------------|------|--------|
| 471.1744  | 1 | C28H27N2O3S   | 471.1737 | 0.7 | 0.7   | -1.5      | 5.5    | 1        | 100.00 | 16.5 | even           | ok   | ok     |
| 493.1570  | 1 | C28H26N2NaO3S | 493.1556 | 1.4 | 1.4   | -2.8      | 5.7    | 1        | 100.00 | 16.5 | even           | ok   | ok     |

L2CM Salma EE-46  
L2CM Salma EE-46

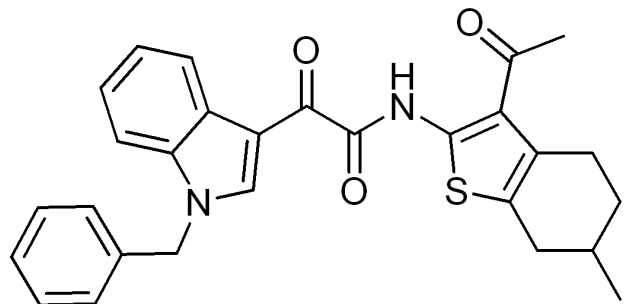

3f

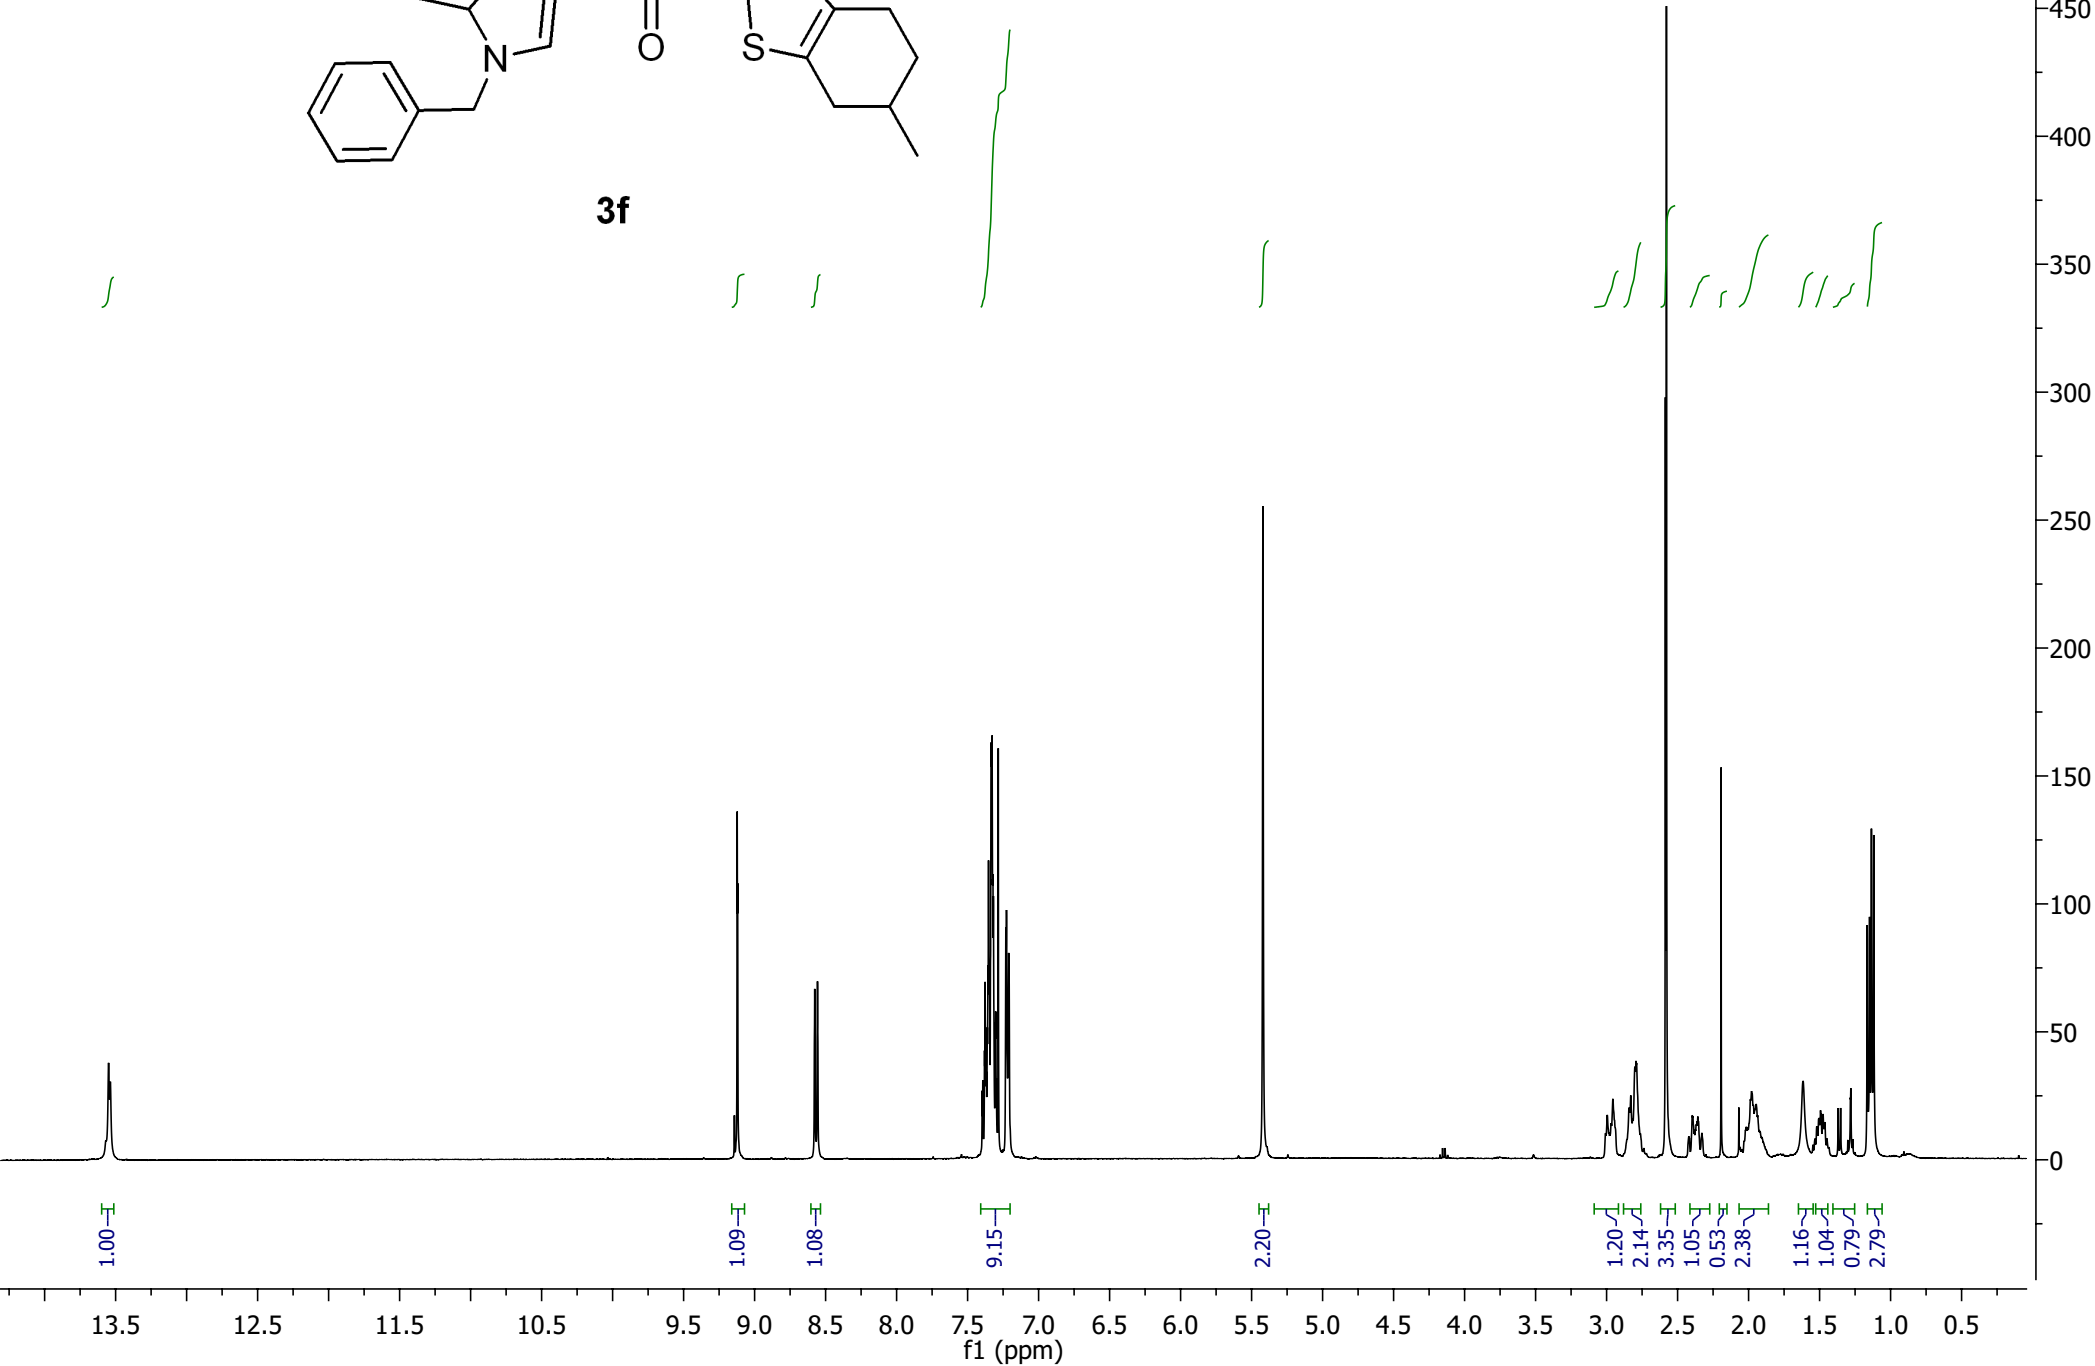

L2CM Salma EE-43 (crys)  
L2CM Salma EE-43 (crys)

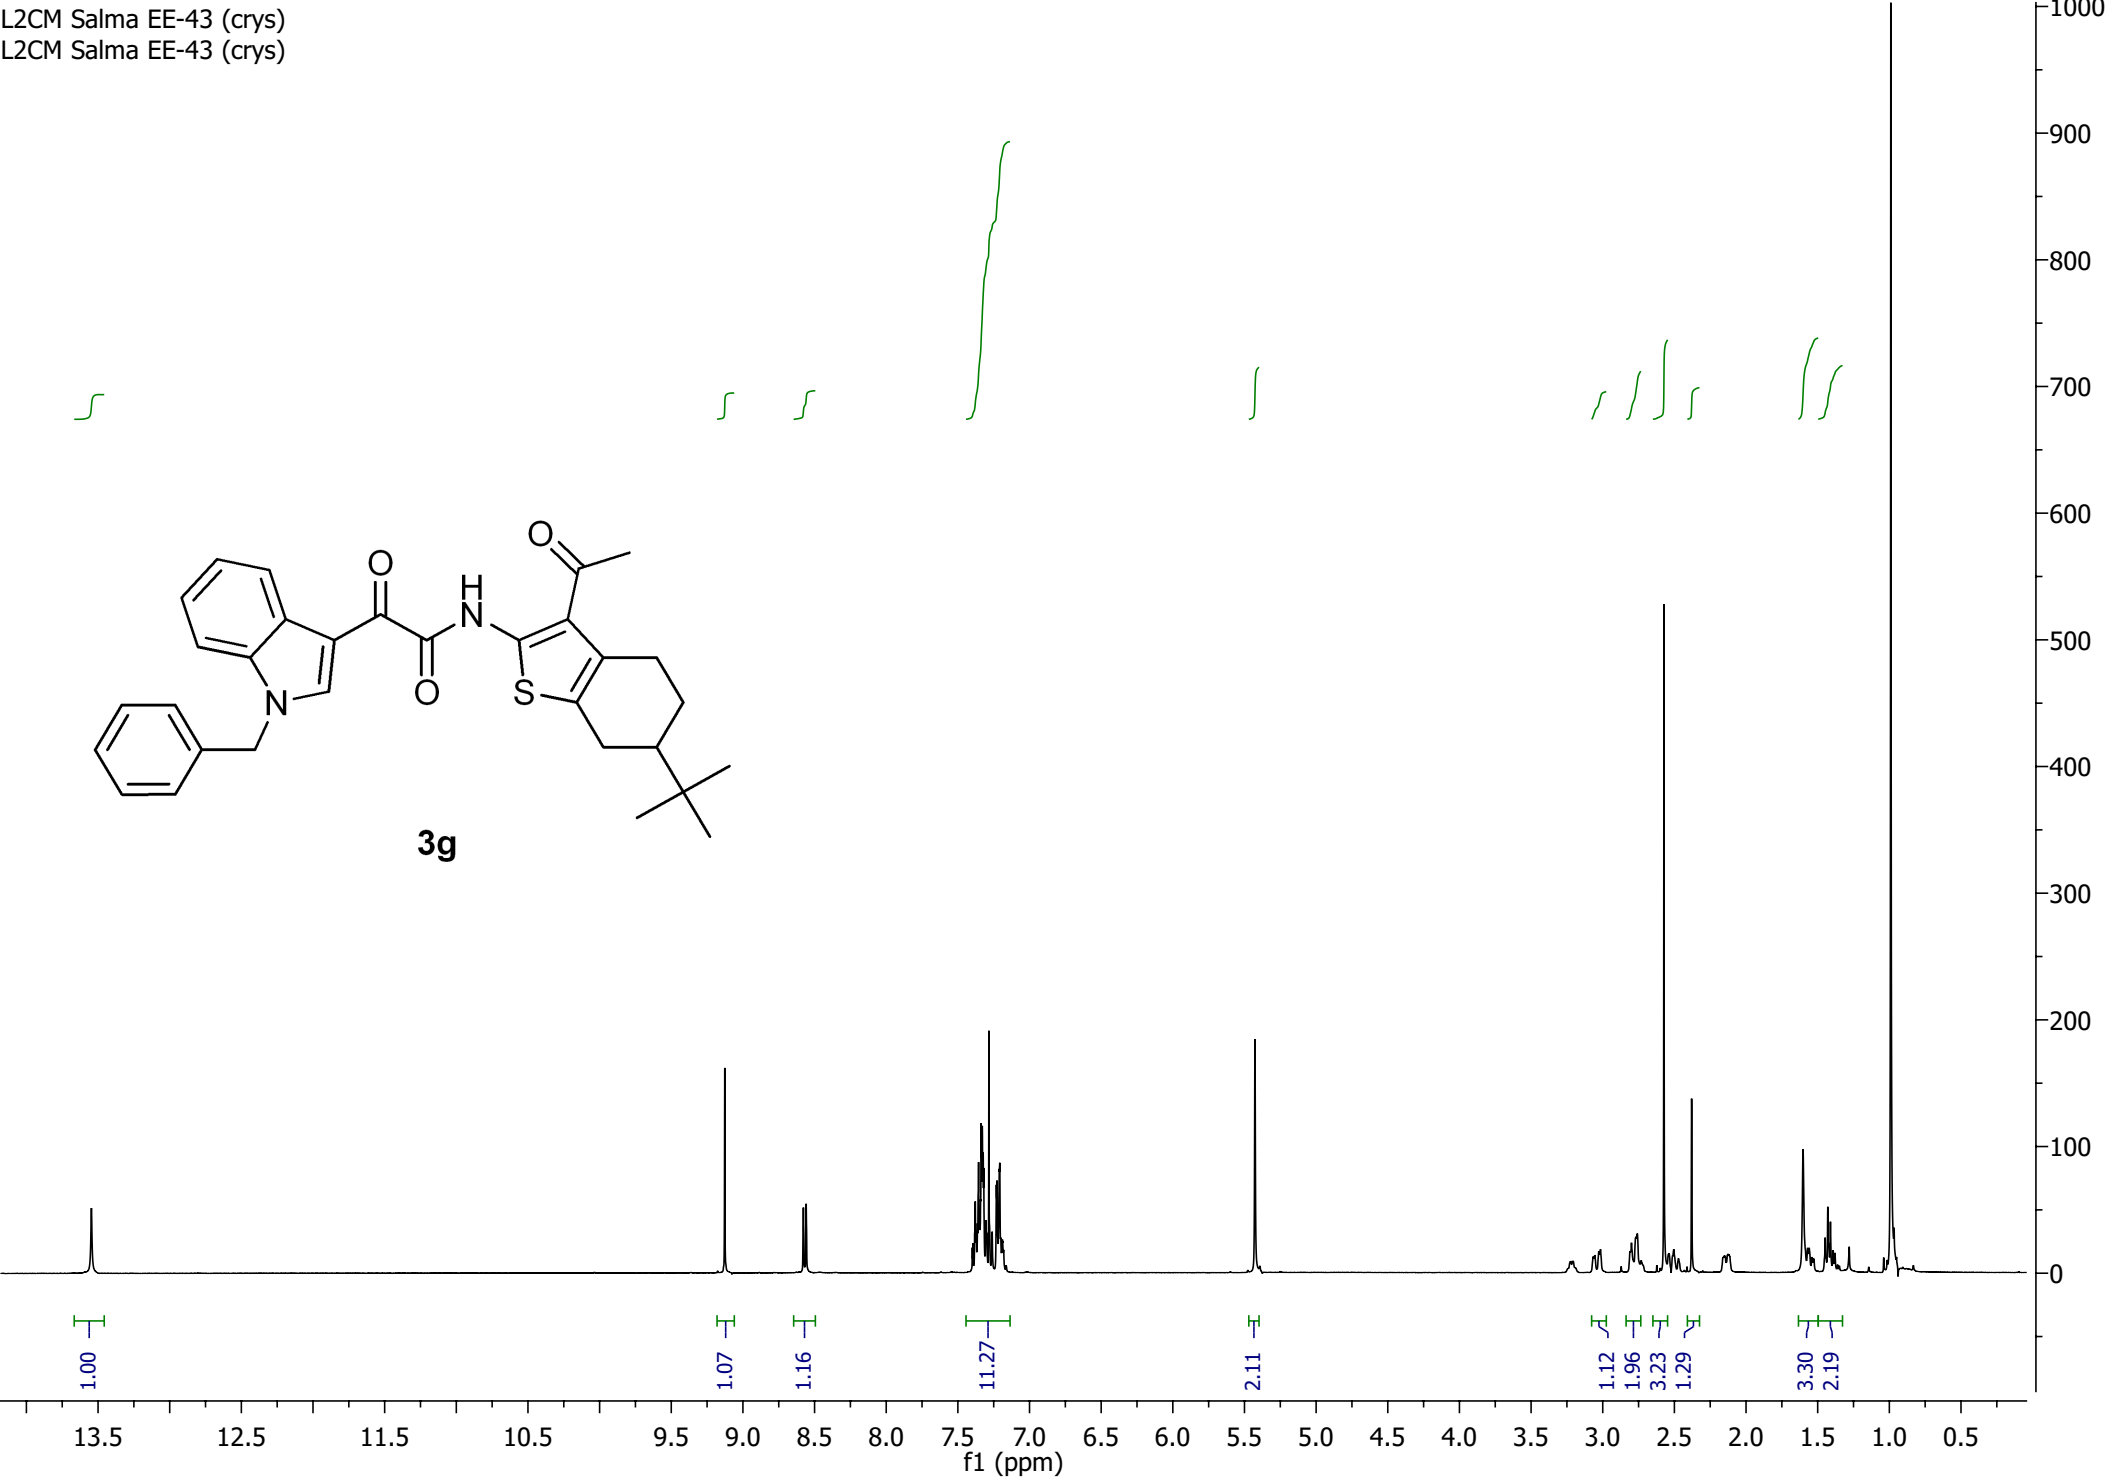

L2CM Salma EE-43 (crys) <sup>13</sup>C

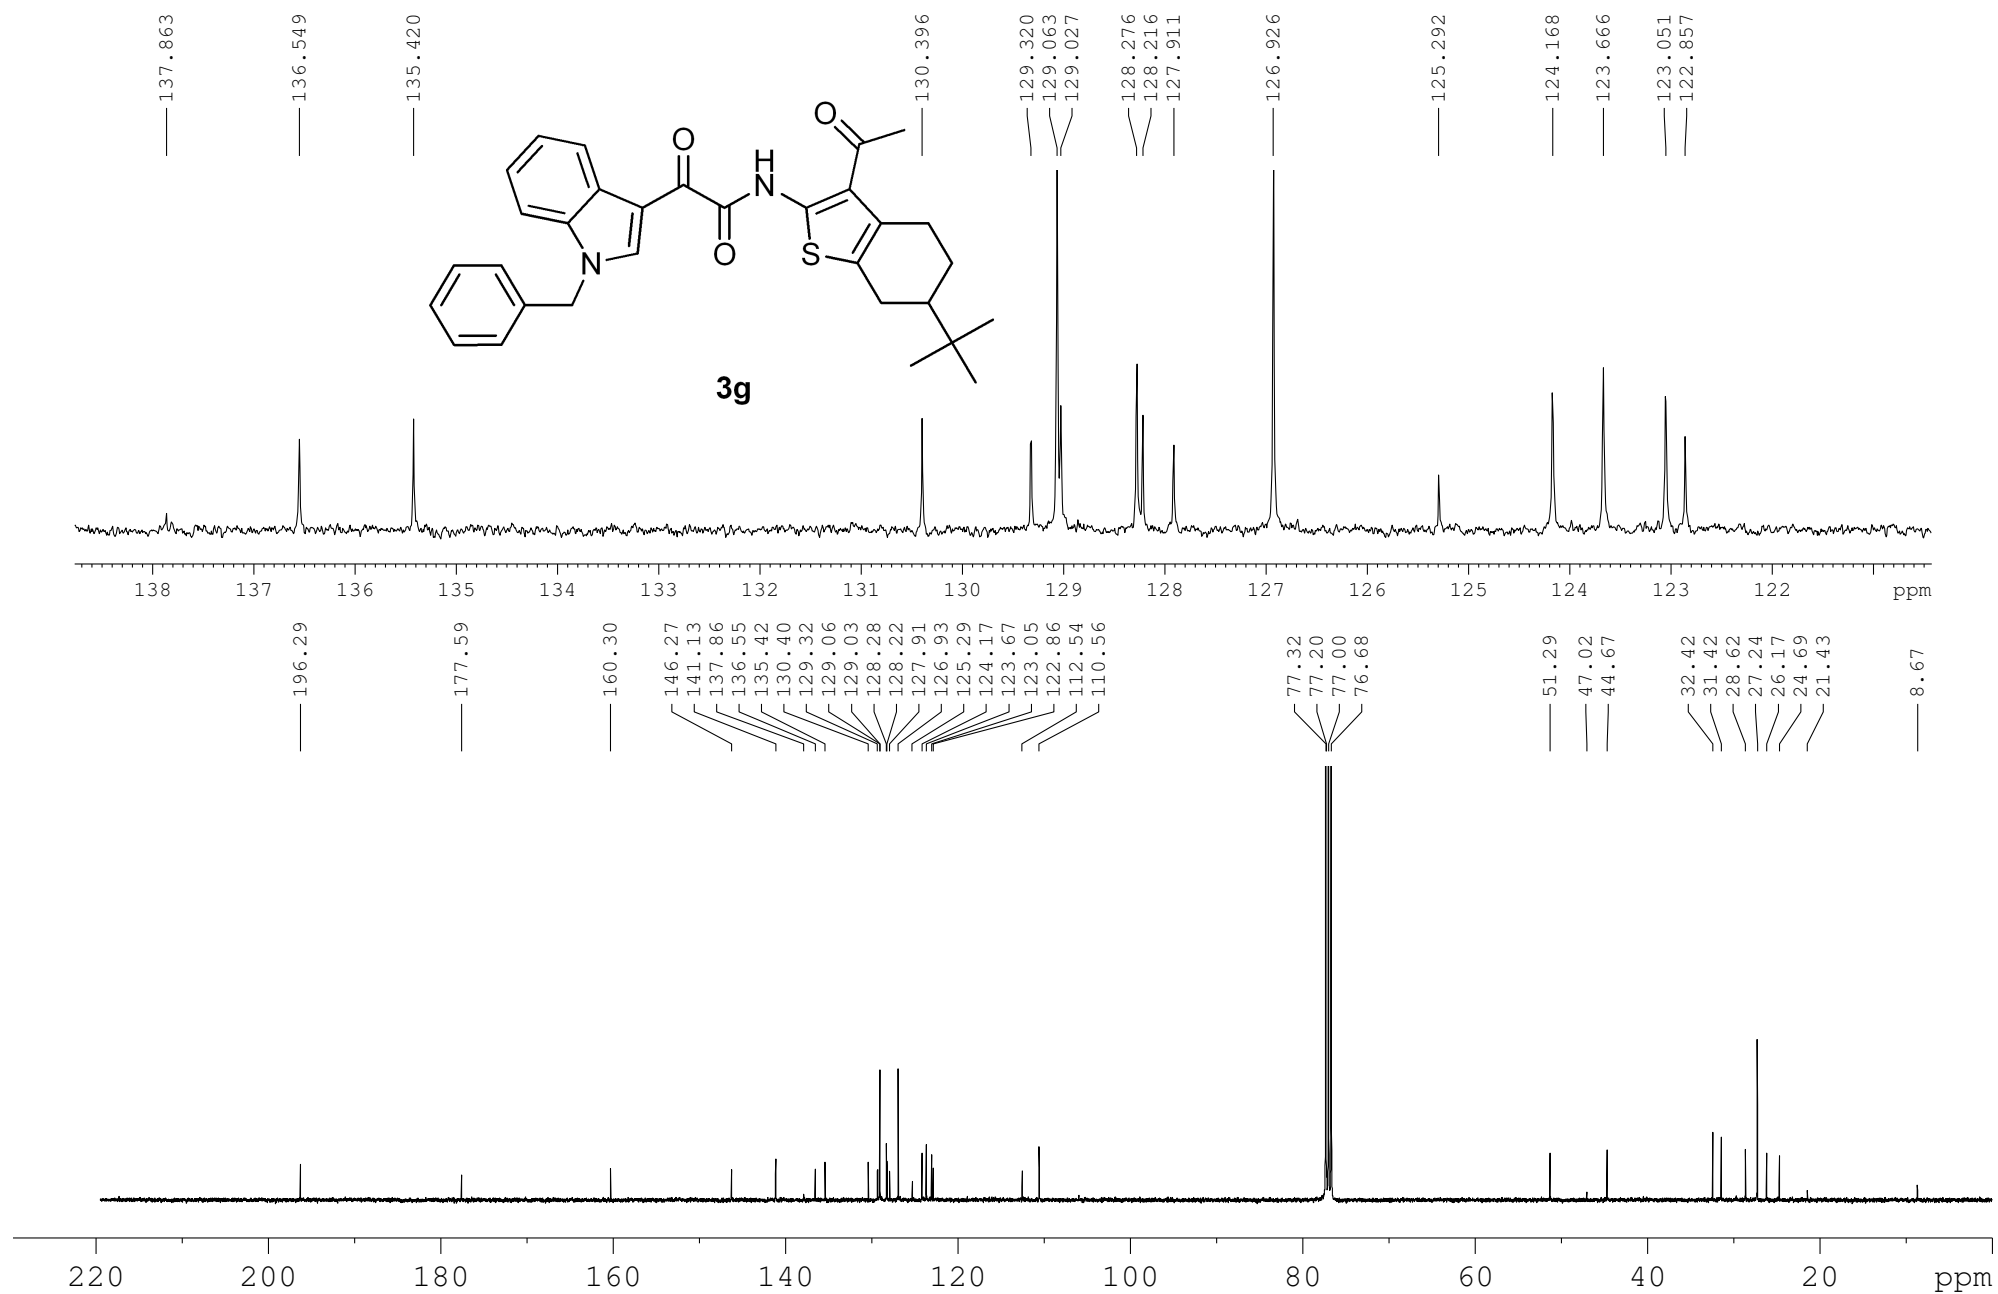

# Display Report

## Analysis Info

Analysis Name D:\Data\2018\180920000005.d  
Method Tuneposlow.m  
Sample Name 180913802///EE43  
Comment CH2Cl2/MeOH

Acquisition Date 9/20/2018 3:56:39 PM

Operator fabien  
Instrument micrOTOF-Q 228888.00098

## Acquisition Parameter

|             |            |                       |           |                  |           |
|-------------|------------|-----------------------|-----------|------------------|-----------|
| Source Type | ESI        | Ion Polarity          | Positive  | Set Nebulizer    | 1.0 Bar   |
| Focus       | Not active | Set Capillary         | 4500 V    | Set Dry Heater   | 190 °C    |
| Scan Begin  | 50 m/z     | Set End Plate Offset  | -500 V    | Set Dry Gas      | 4.0 l/min |
| Scan End    | 3000 m/z   | Set Collision Cell RF | 250.0 Vpp | Set Divert Valve | Source    |

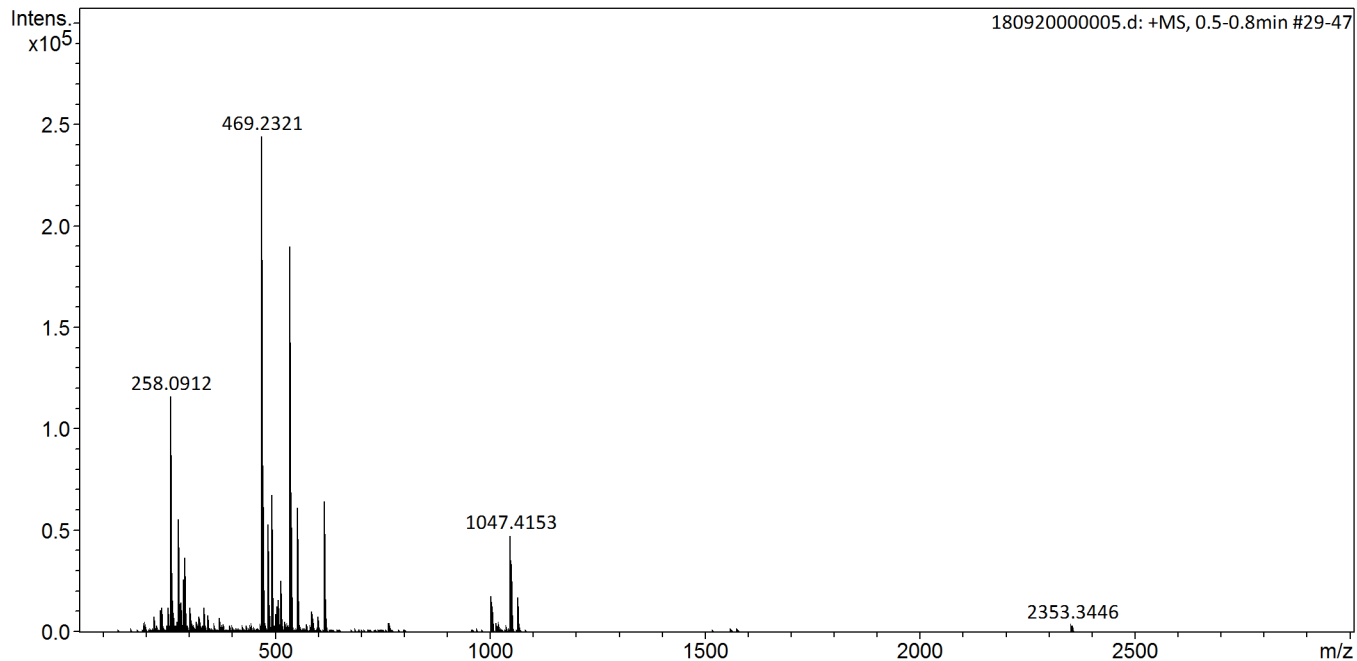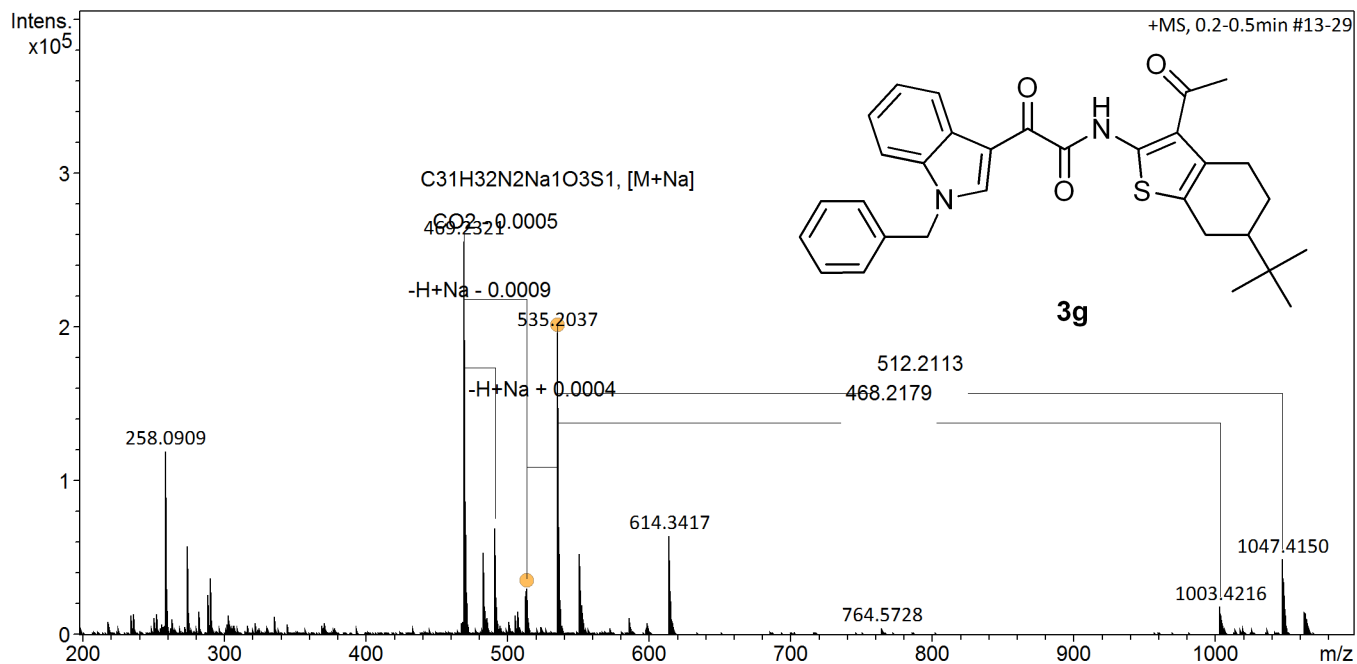

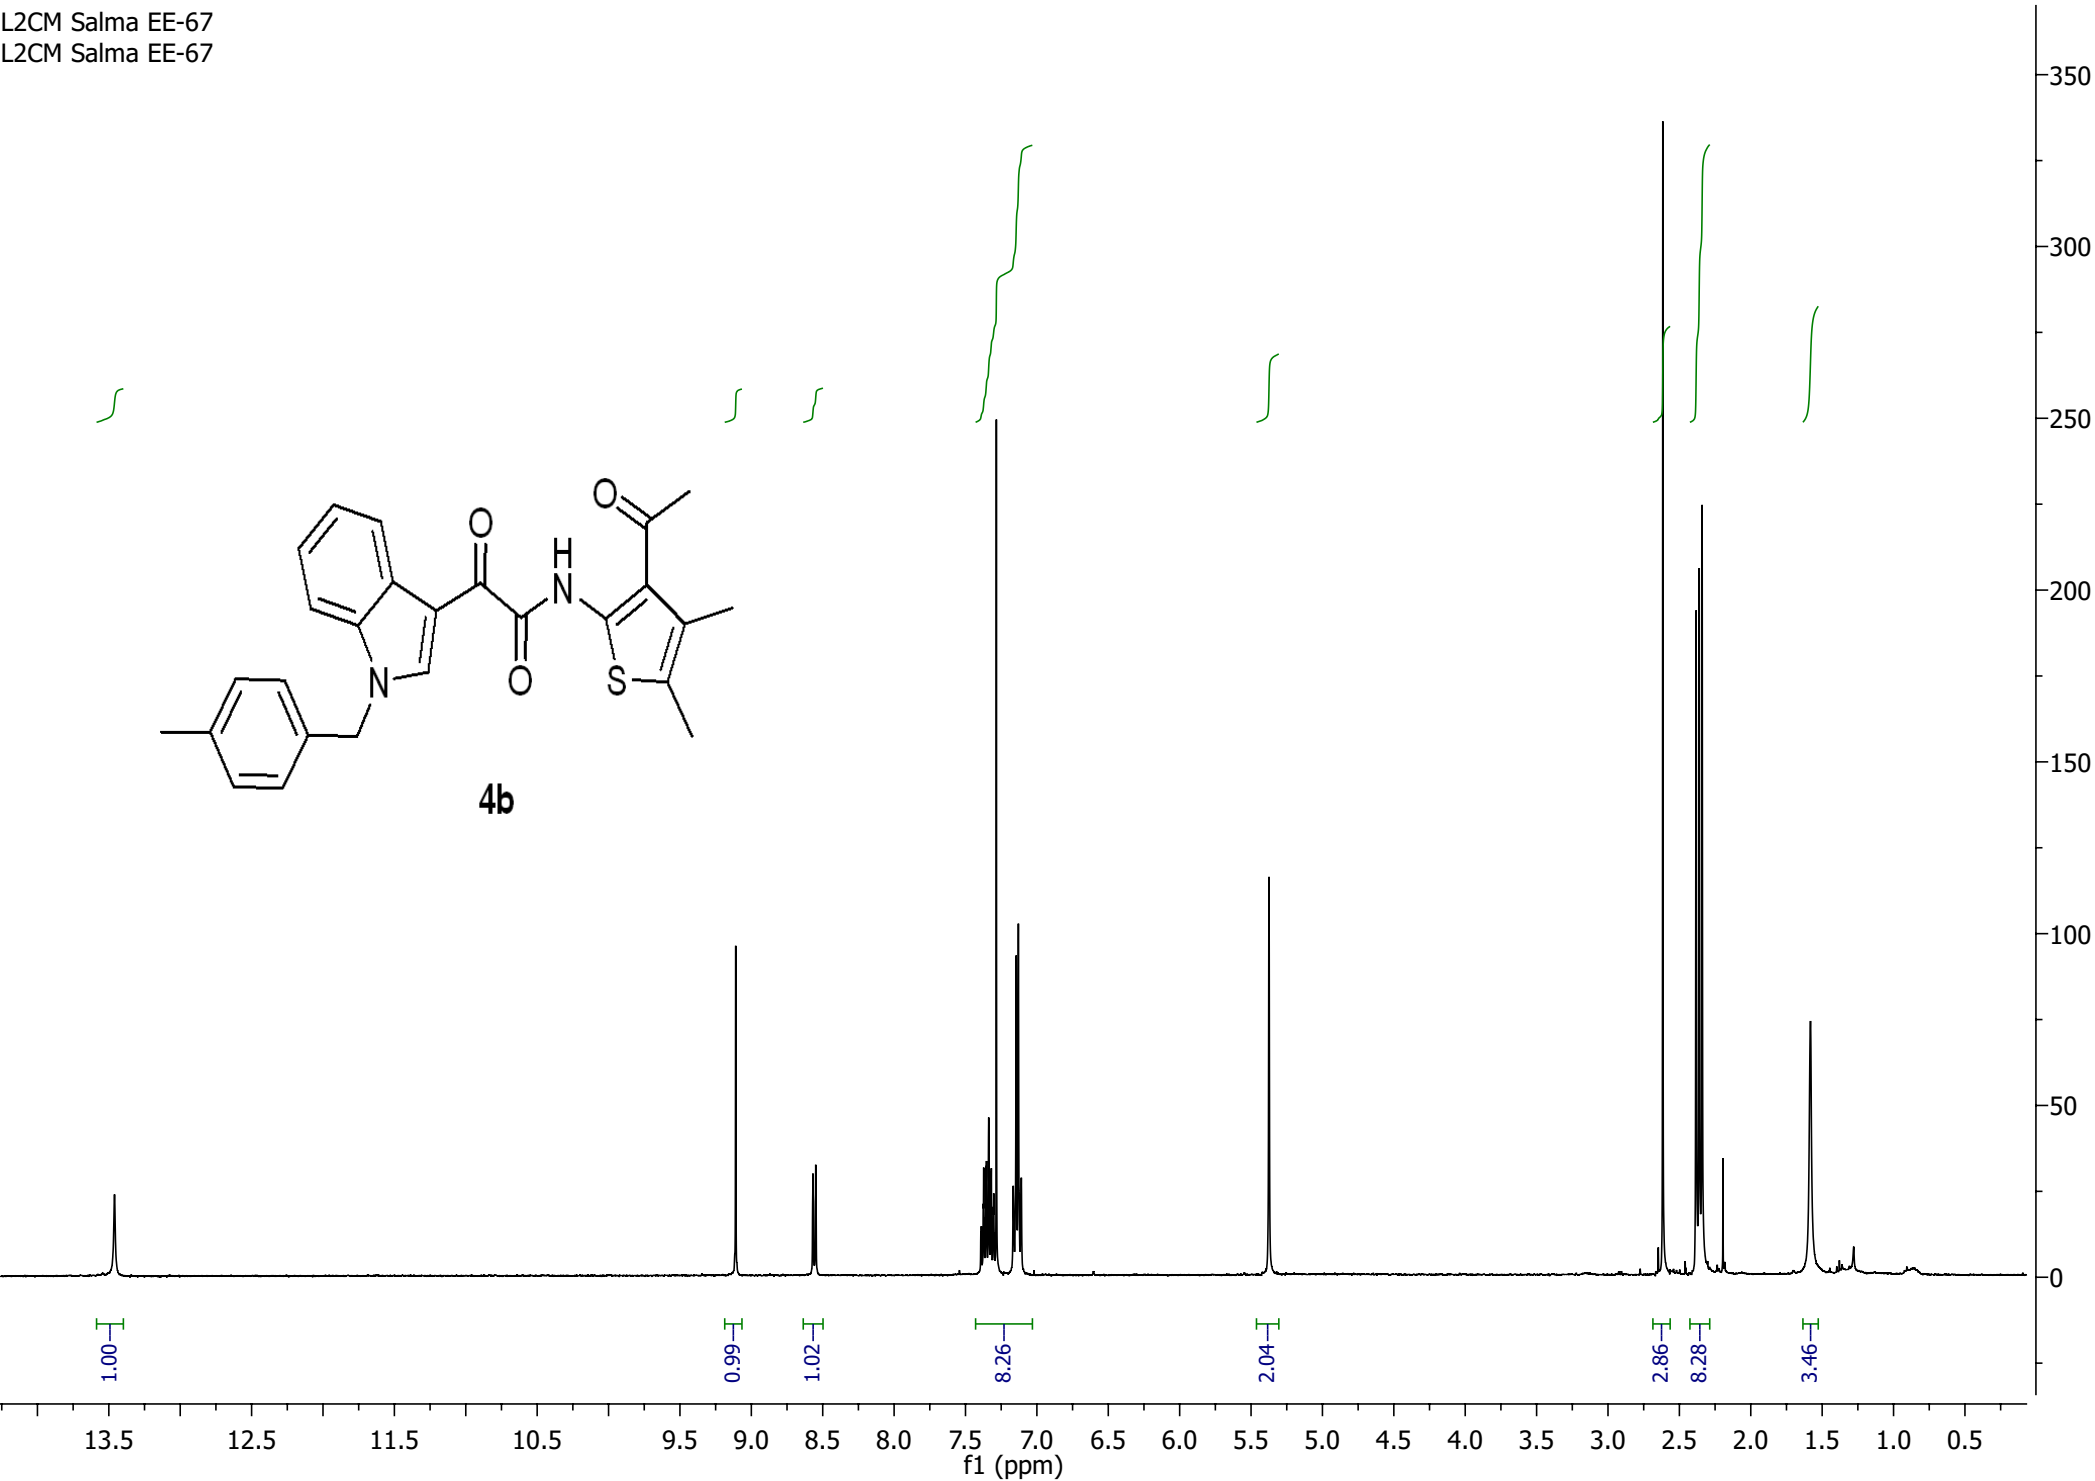

L2CM Salma EE-67 13cpd

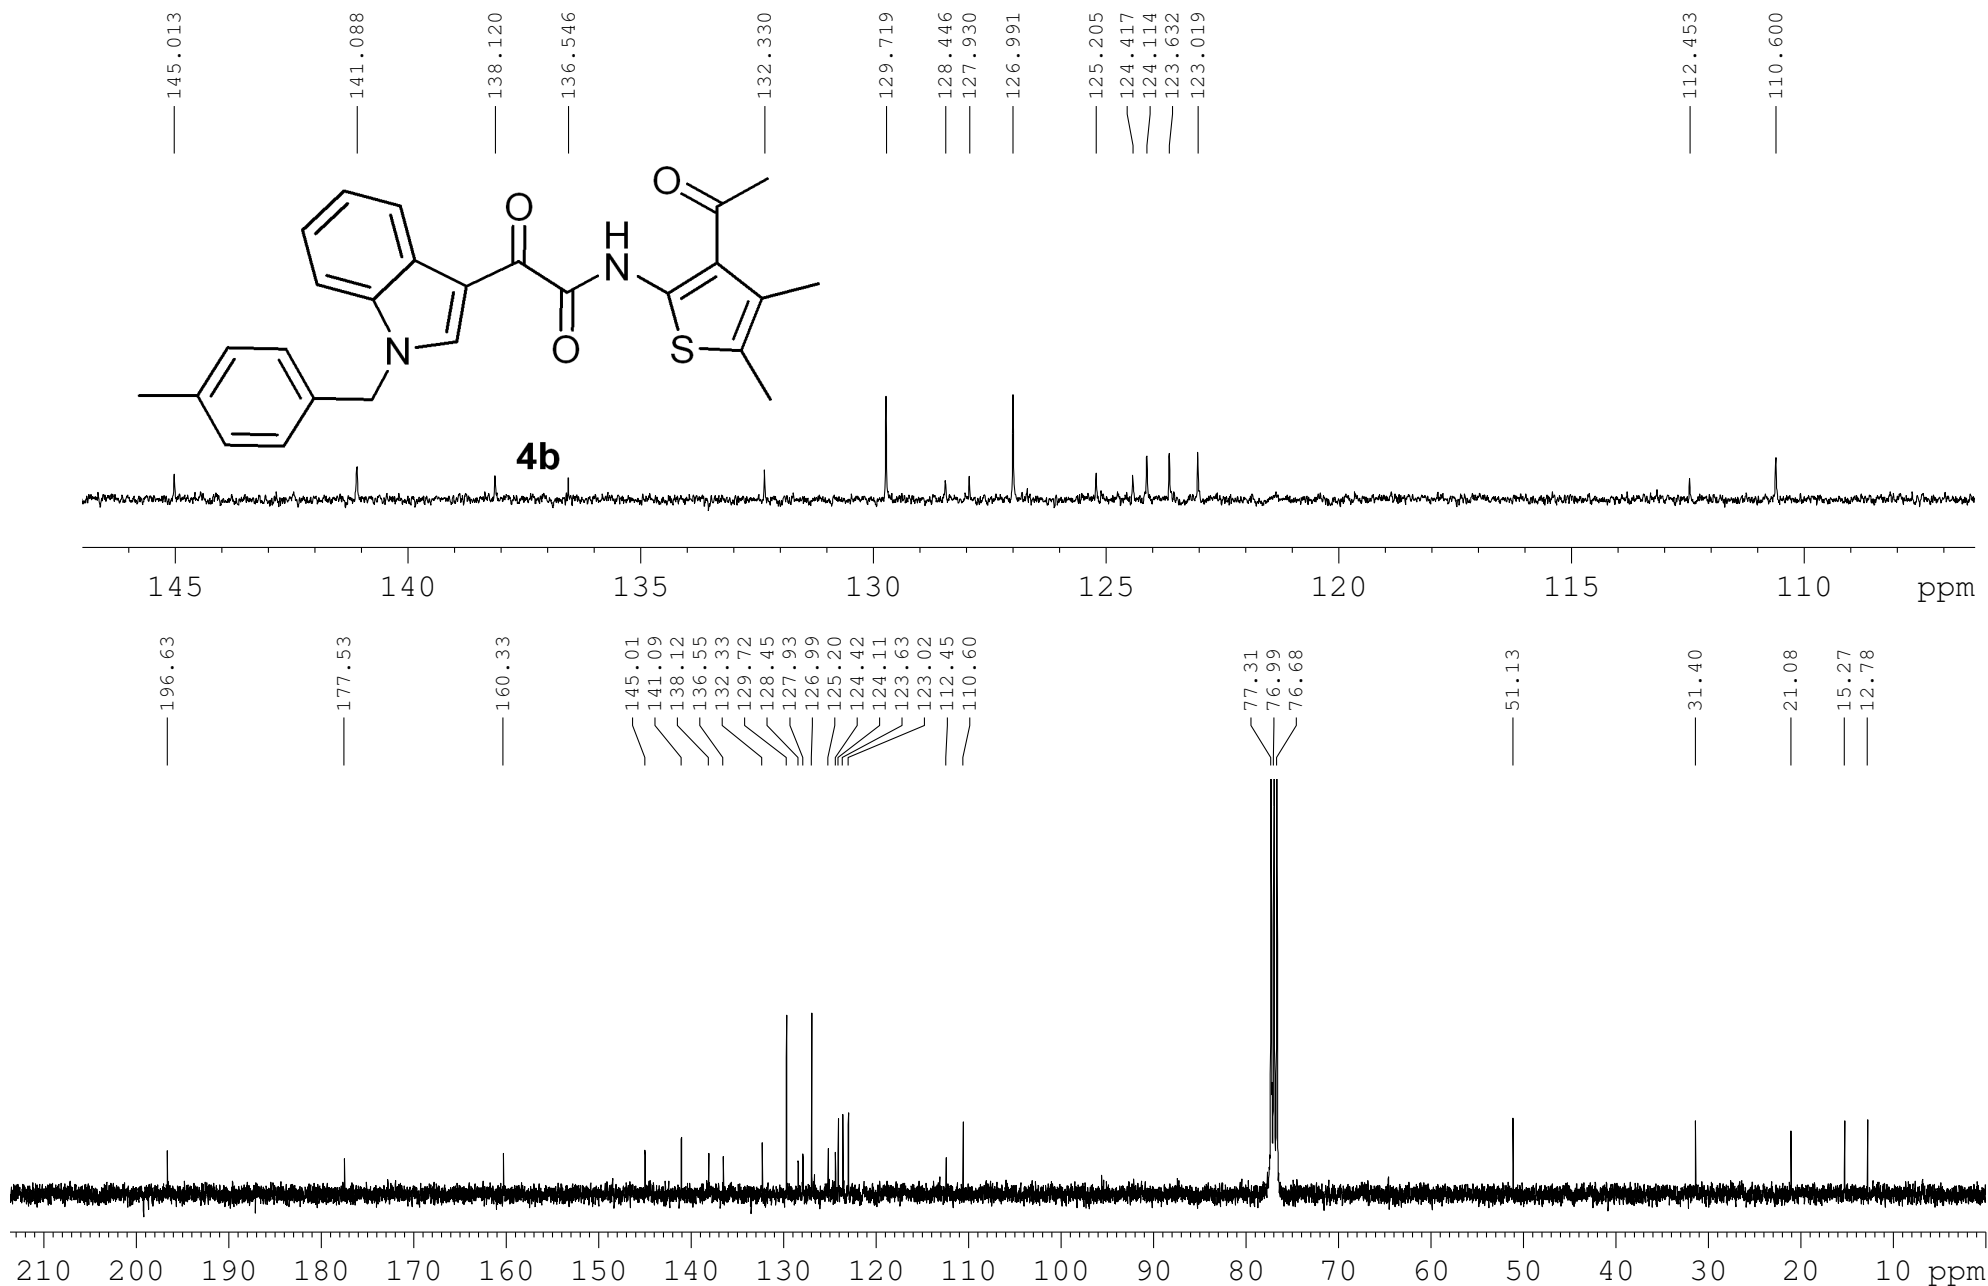

# Mass Spectrum SmartFormula Report

## Analysis Info

Analysis Name D:\Data\2018\180920000007.d  
Method Tuneposlow.m  
Sample Name 180913804///EE67  
Comment CH2Cl2/MeOH

Acquisition Date 9/20/2018 4:41:19 PM

Operator fabien  
Instrument micrOTOF-Q 228888.00098

## Acquisition Parameter

|             |            |                       |           |                  |           |
|-------------|------------|-----------------------|-----------|------------------|-----------|
| Source Type | ESI        | Ion Polarity          | Positive  | Set Nebulizer    | 1.0 Bar   |
| Focus       | Not active | Set Capillary         | 4500 V    | Set Dry Heater   | 190 °C    |
| Scan Begin  | 50 m/z     | Set End Plate Offset  | -500 V    | Set Dry Gas      | 4.0 l/min |
| Scan End    | 3000 m/z   | Set Collision Cell RF | 250.0 Vpp | Set Divert Valve | Source    |

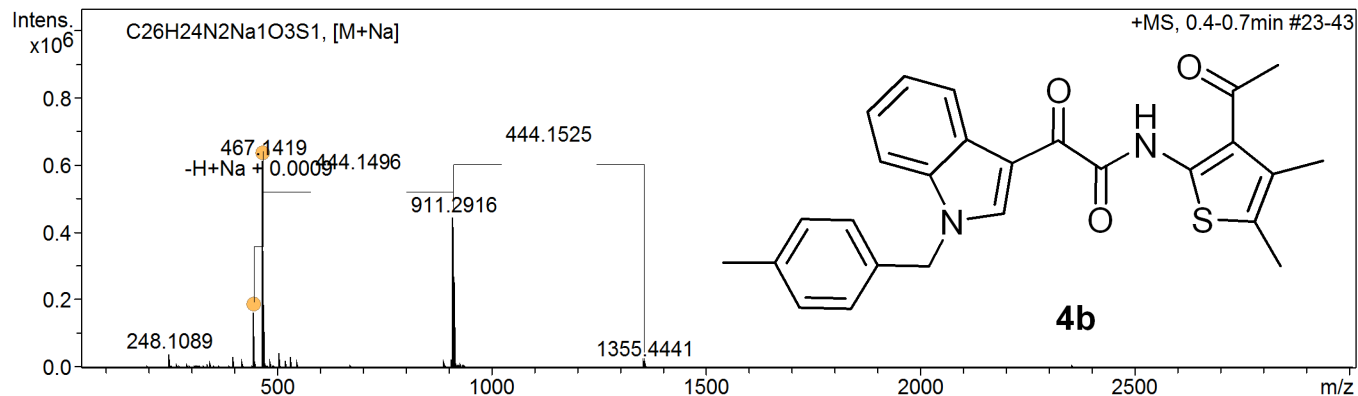

| Meas. m/z | # | Ion Formula   | m/z      | err  [mDa] | err [ppm] | mSigma | # mSigma | Score  | rdB  | e <sup>-</sup> | Conf | N-Rule |
|-----------|---|---------------|----------|------------|-----------|--------|----------|--------|------|----------------|------|--------|
| 445.1590  | 1 | C26H25N2O3S   | 445.1580 | 1.0        | -2.2      | 2.2    | 1        | 100.00 | 15.5 | even           |      | ok     |
| 467.1419  | 1 | C26H24N2NaO3S | 467.1400 | 1.9        | -4.1      | 2.4    | 1        | 100.00 | 15.5 | even           |      | ok     |



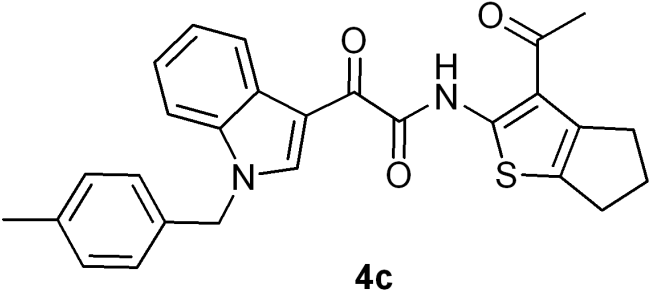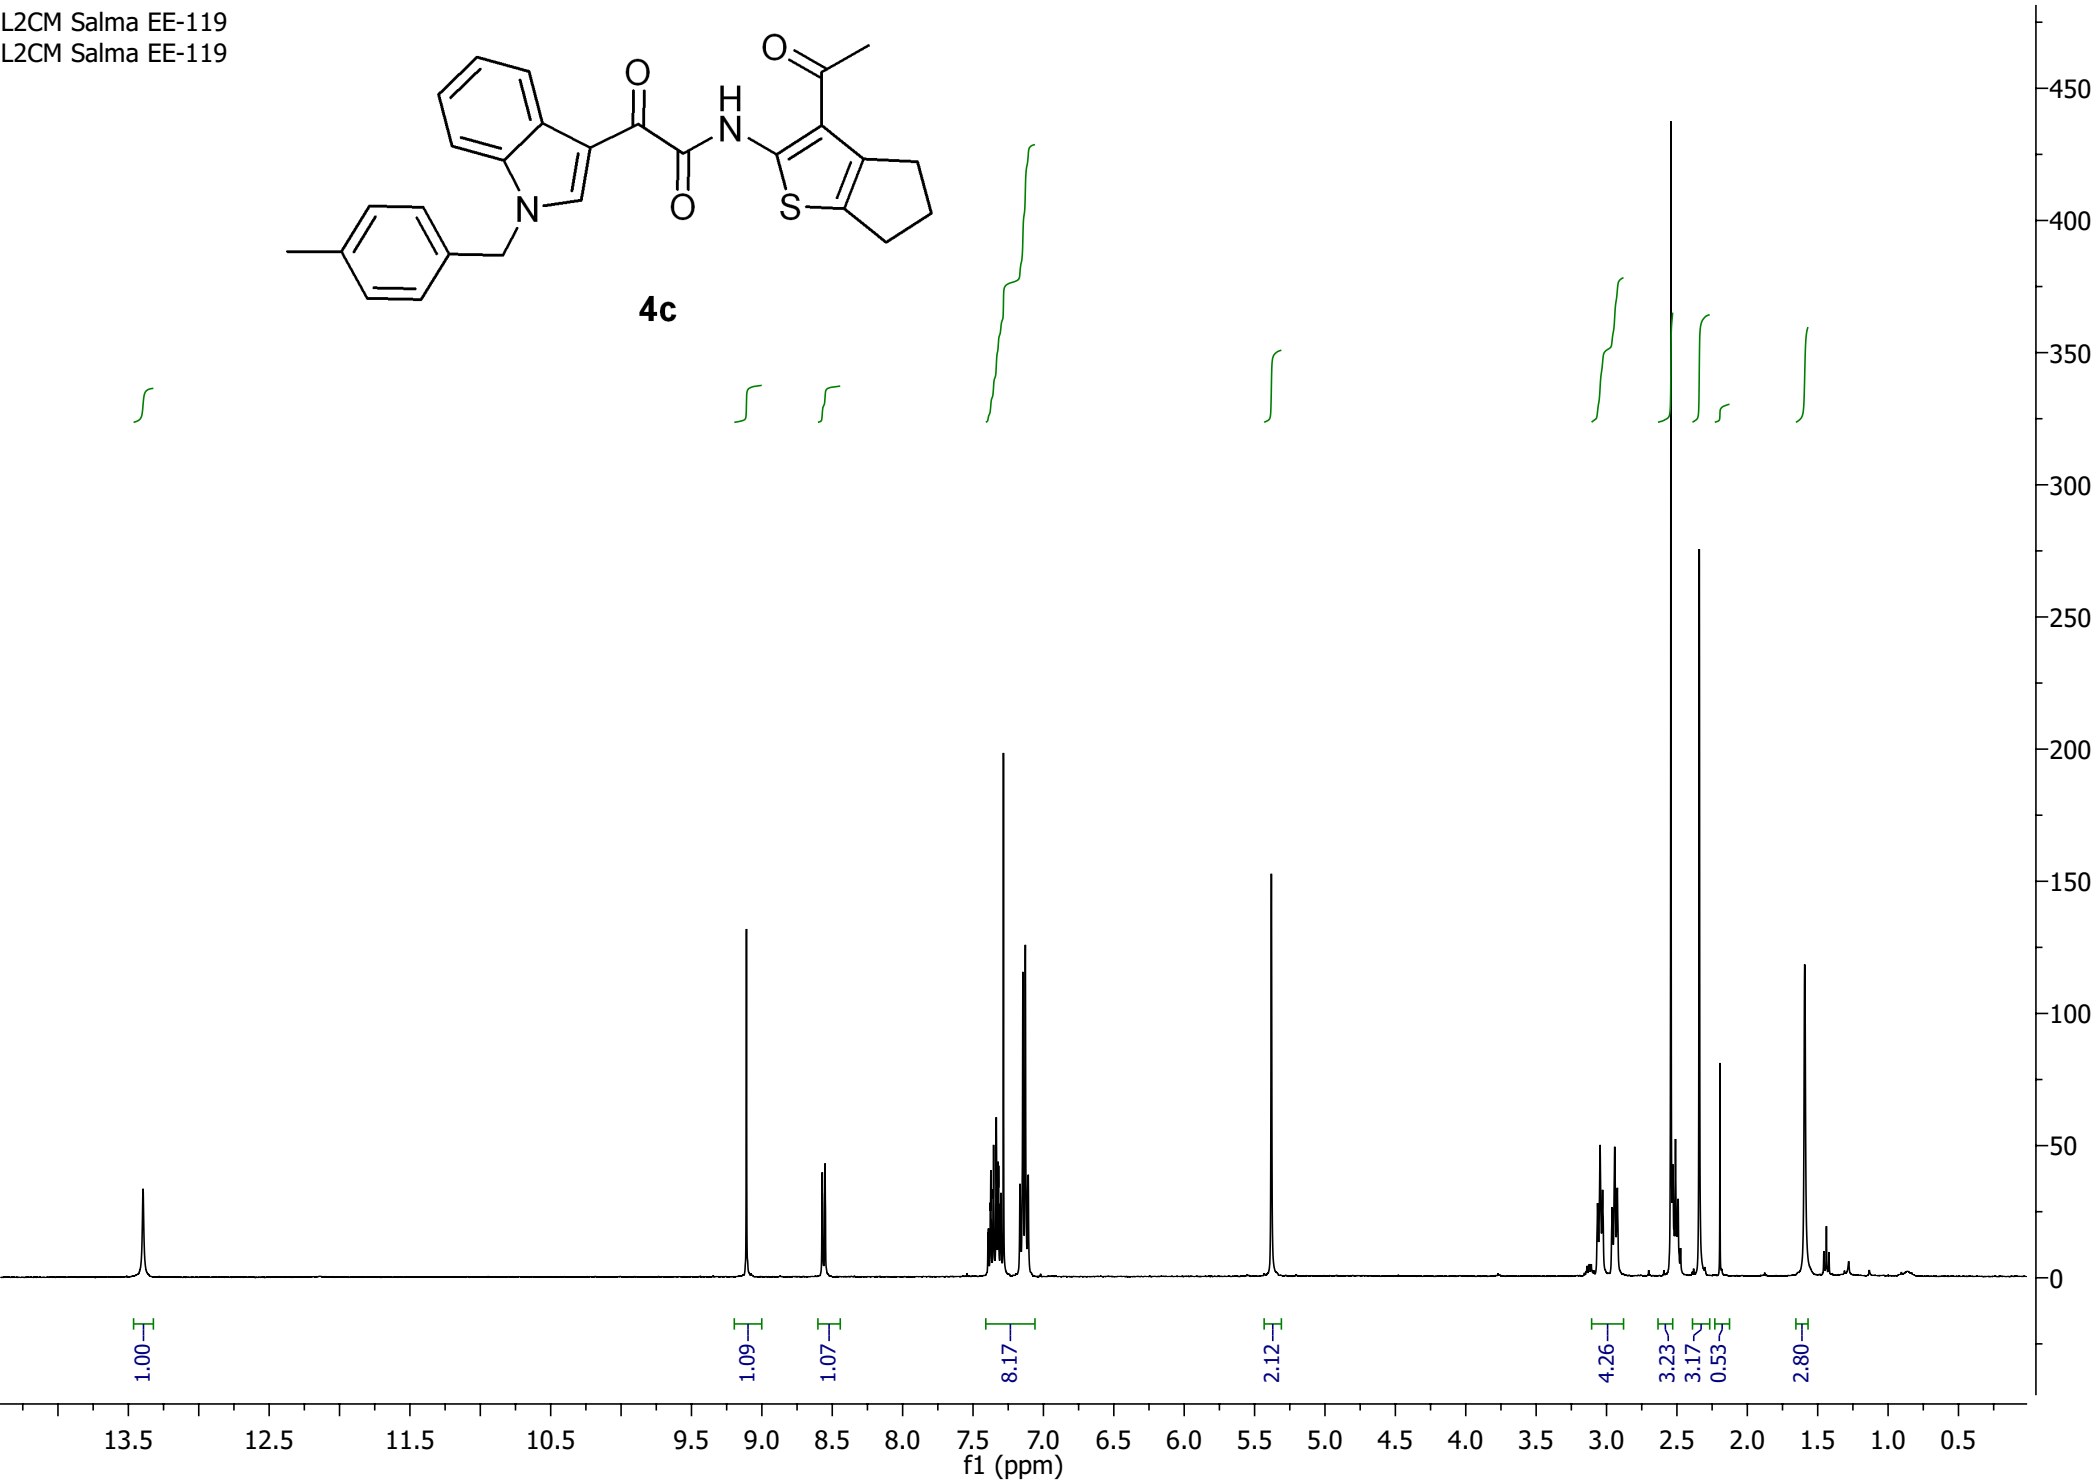

L2CM Salma EE-119 13cpd

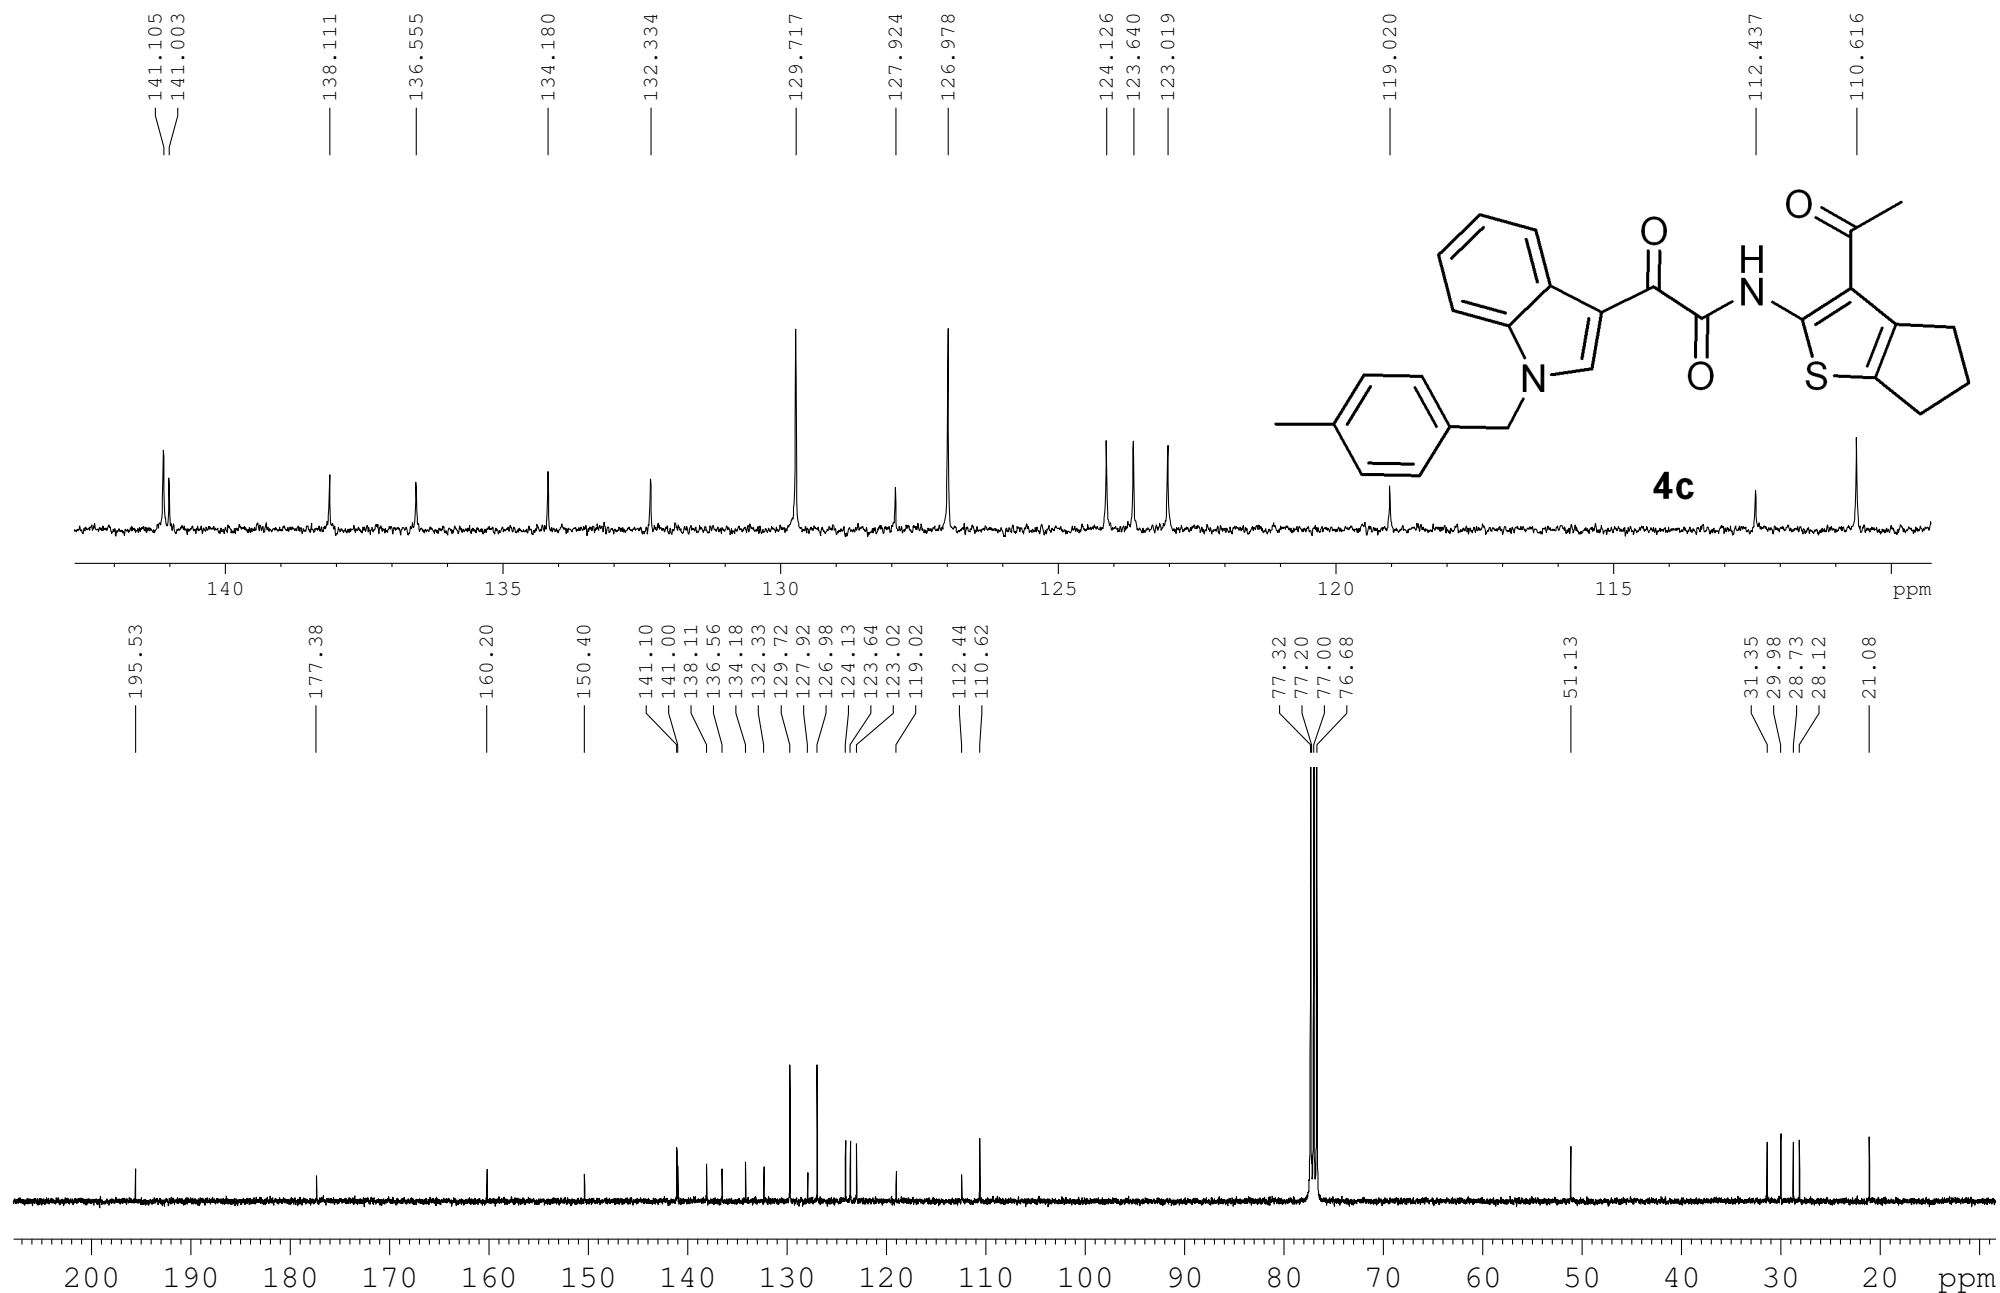

L2CM Salma EE-69

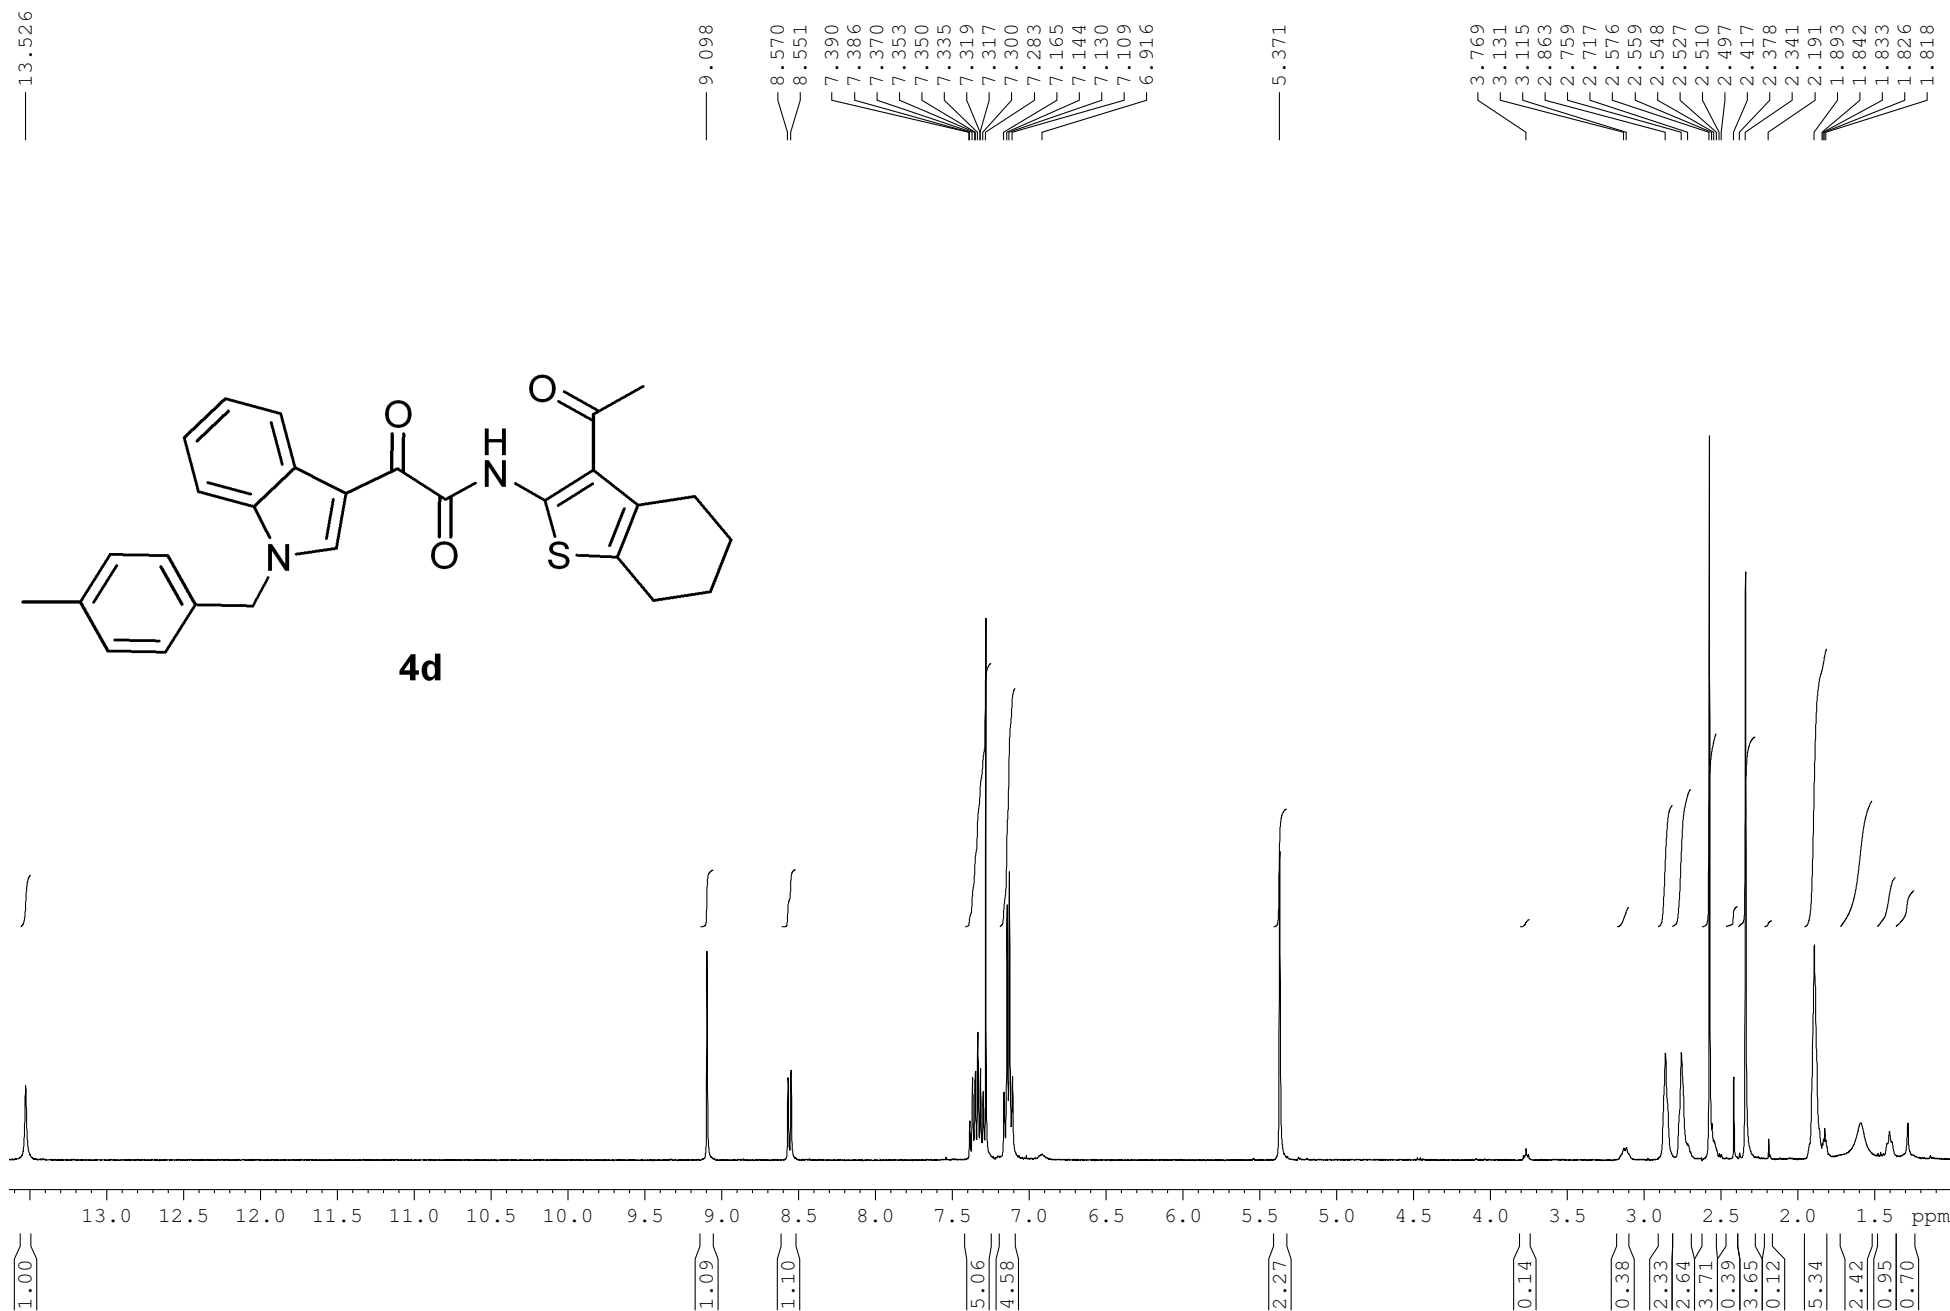

L2CM Salma EE-69 13C

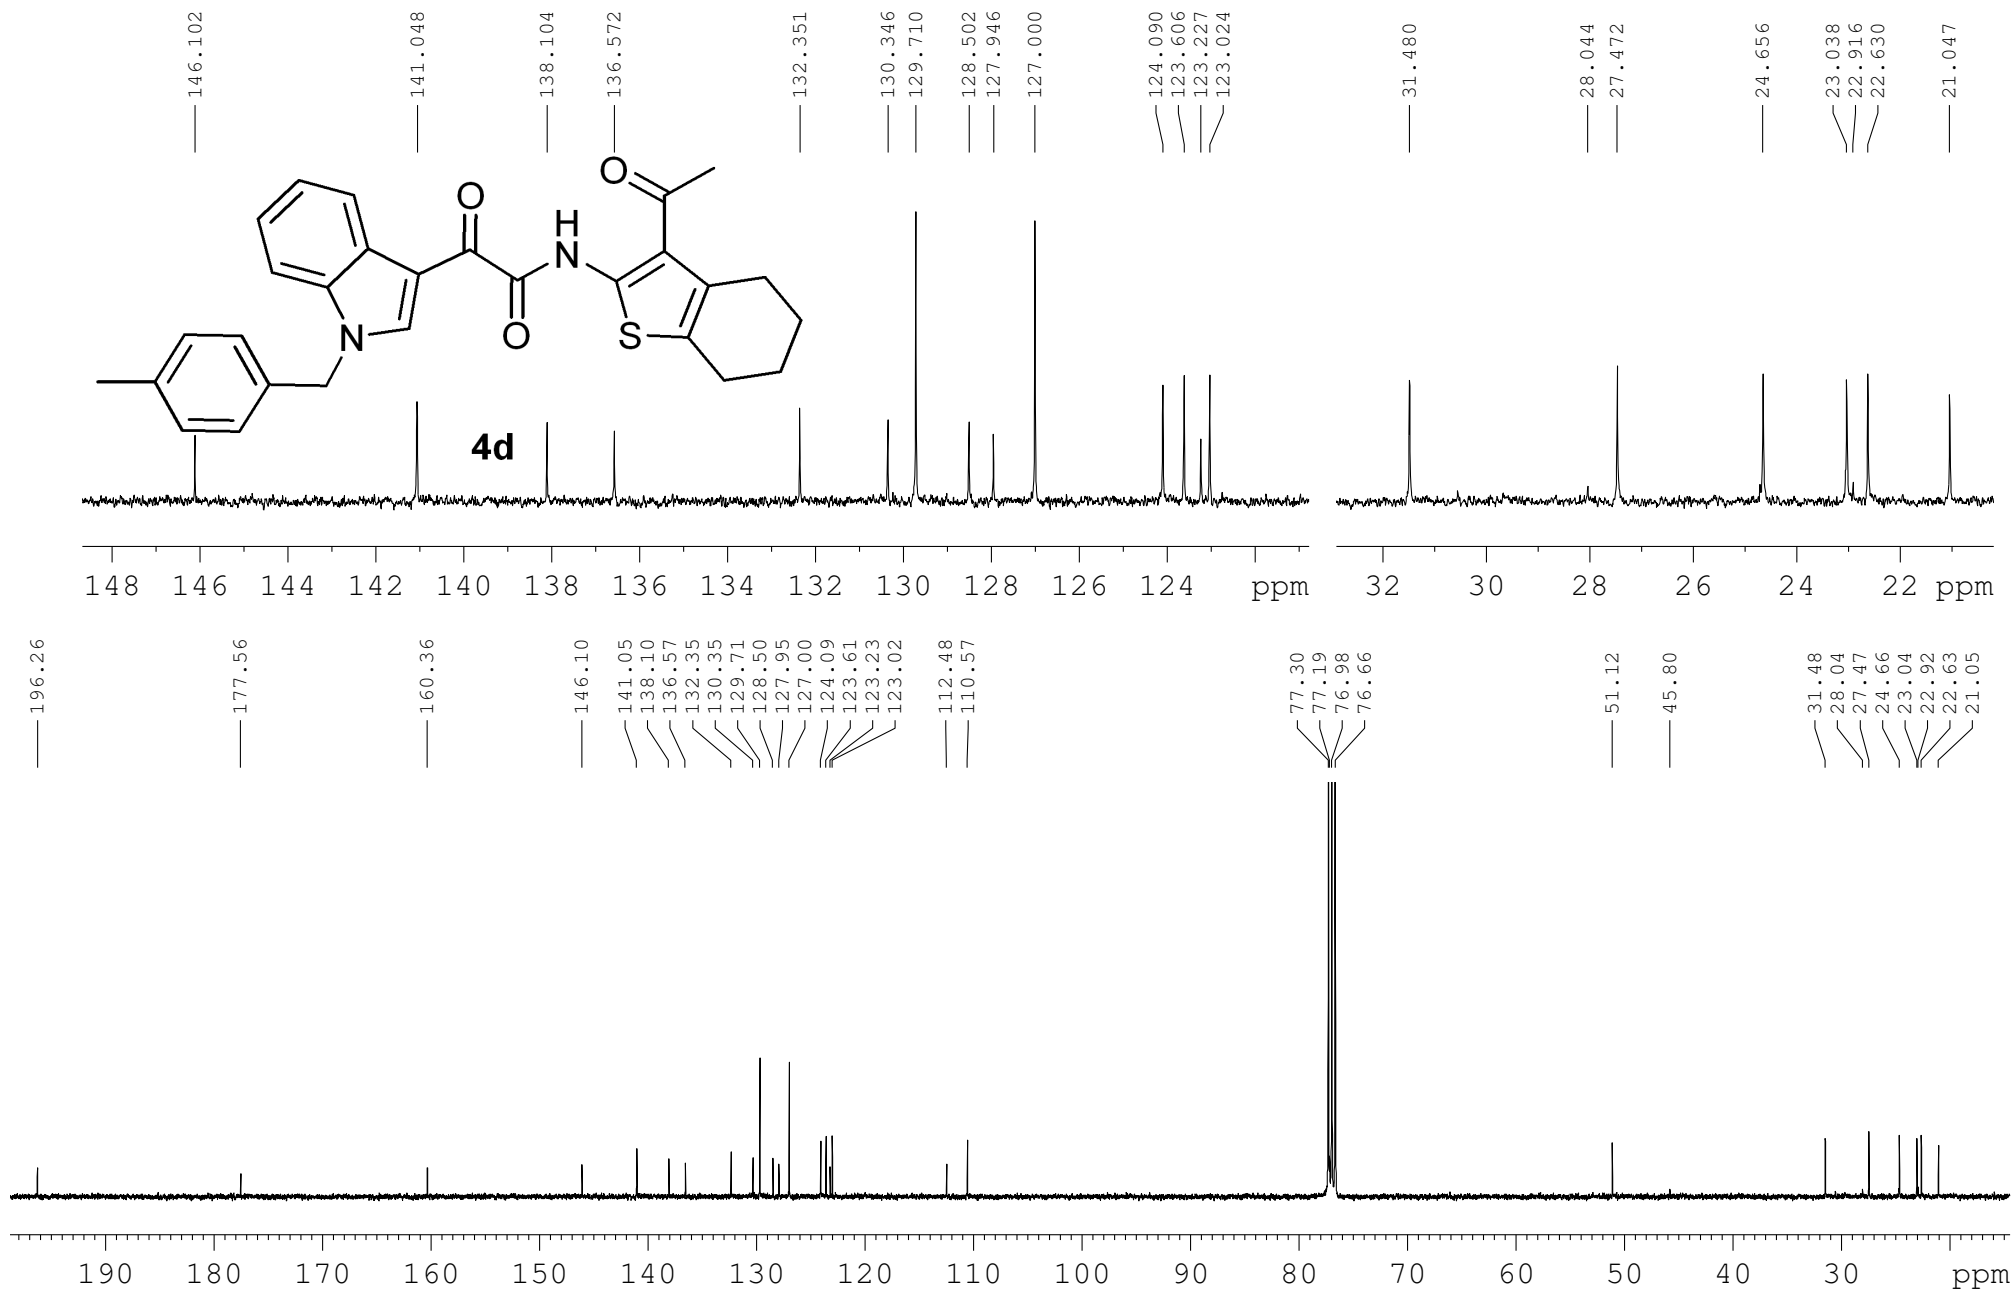

# Mass Spectrum SmartFormula Report

## Analysis Info

Analysis Name D:\Data\2018\180924000001.d  
Method Tuneposlow.m  
Sample Name 180913805///EE-69  
Comment MeOH/CH<sub>2</sub>Cl<sub>2</sub>

Acquisition Date 9/24/2018 11:53:25 AM

Operator fabien  
Instrument micrOTOF-Q 228888.00098

## Acquisition Parameter

|             |            |                       |           |                  |           |
|-------------|------------|-----------------------|-----------|------------------|-----------|
| Source Type | ESI        | Ion Polarity          | Positive  | Set Nebulizer    | 1.0 Bar   |
| Focus       | Not active | Set Capillary         | 4500 V    | Set Dry Heater   | 190 °C    |
| Scan Begin  | 50 m/z     | Set End Plate Offset  | -500 V    | Set Dry Gas      | 4.0 l/min |
| Scan End    | 3000 m/z   | Set Collision Cell RF | 250.0 Vpp | Set Divert Valve | Source    |

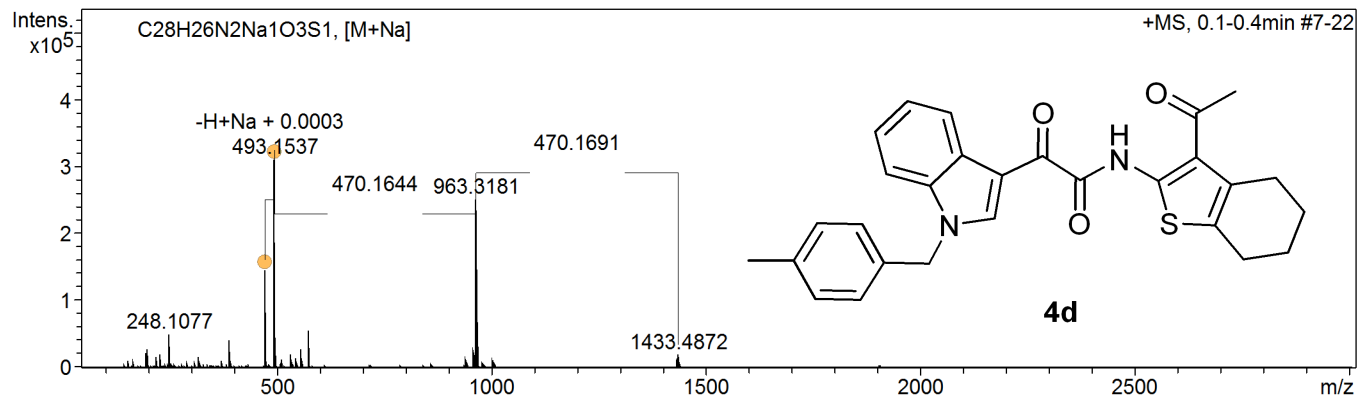

| Meas. m/z | # | Ion Formula   | m/z      | err | [mDa] | err [ppm] | mSigma | # mSigma | Score  | rdB  | e <sup>-</sup> | Conf | N-Rule |
|-----------|---|---------------|----------|-----|-------|-----------|--------|----------|--------|------|----------------|------|--------|
| 471.1715  | 1 | C28H27N2O3S   | 471.1737 | 2.2 |       | 4.7       | 3.7    | 1        | 100.00 | 16.5 | even           |      | ok     |
| 493.1537  | 1 | C28H26N2NaO3S | 493.1556 | 1.9 |       | 3.8       | 1.5    | 1        | 100.00 | 16.5 | even           |      | ok     |

L2CM Salma EE-70  
L2CM Salma EE-70

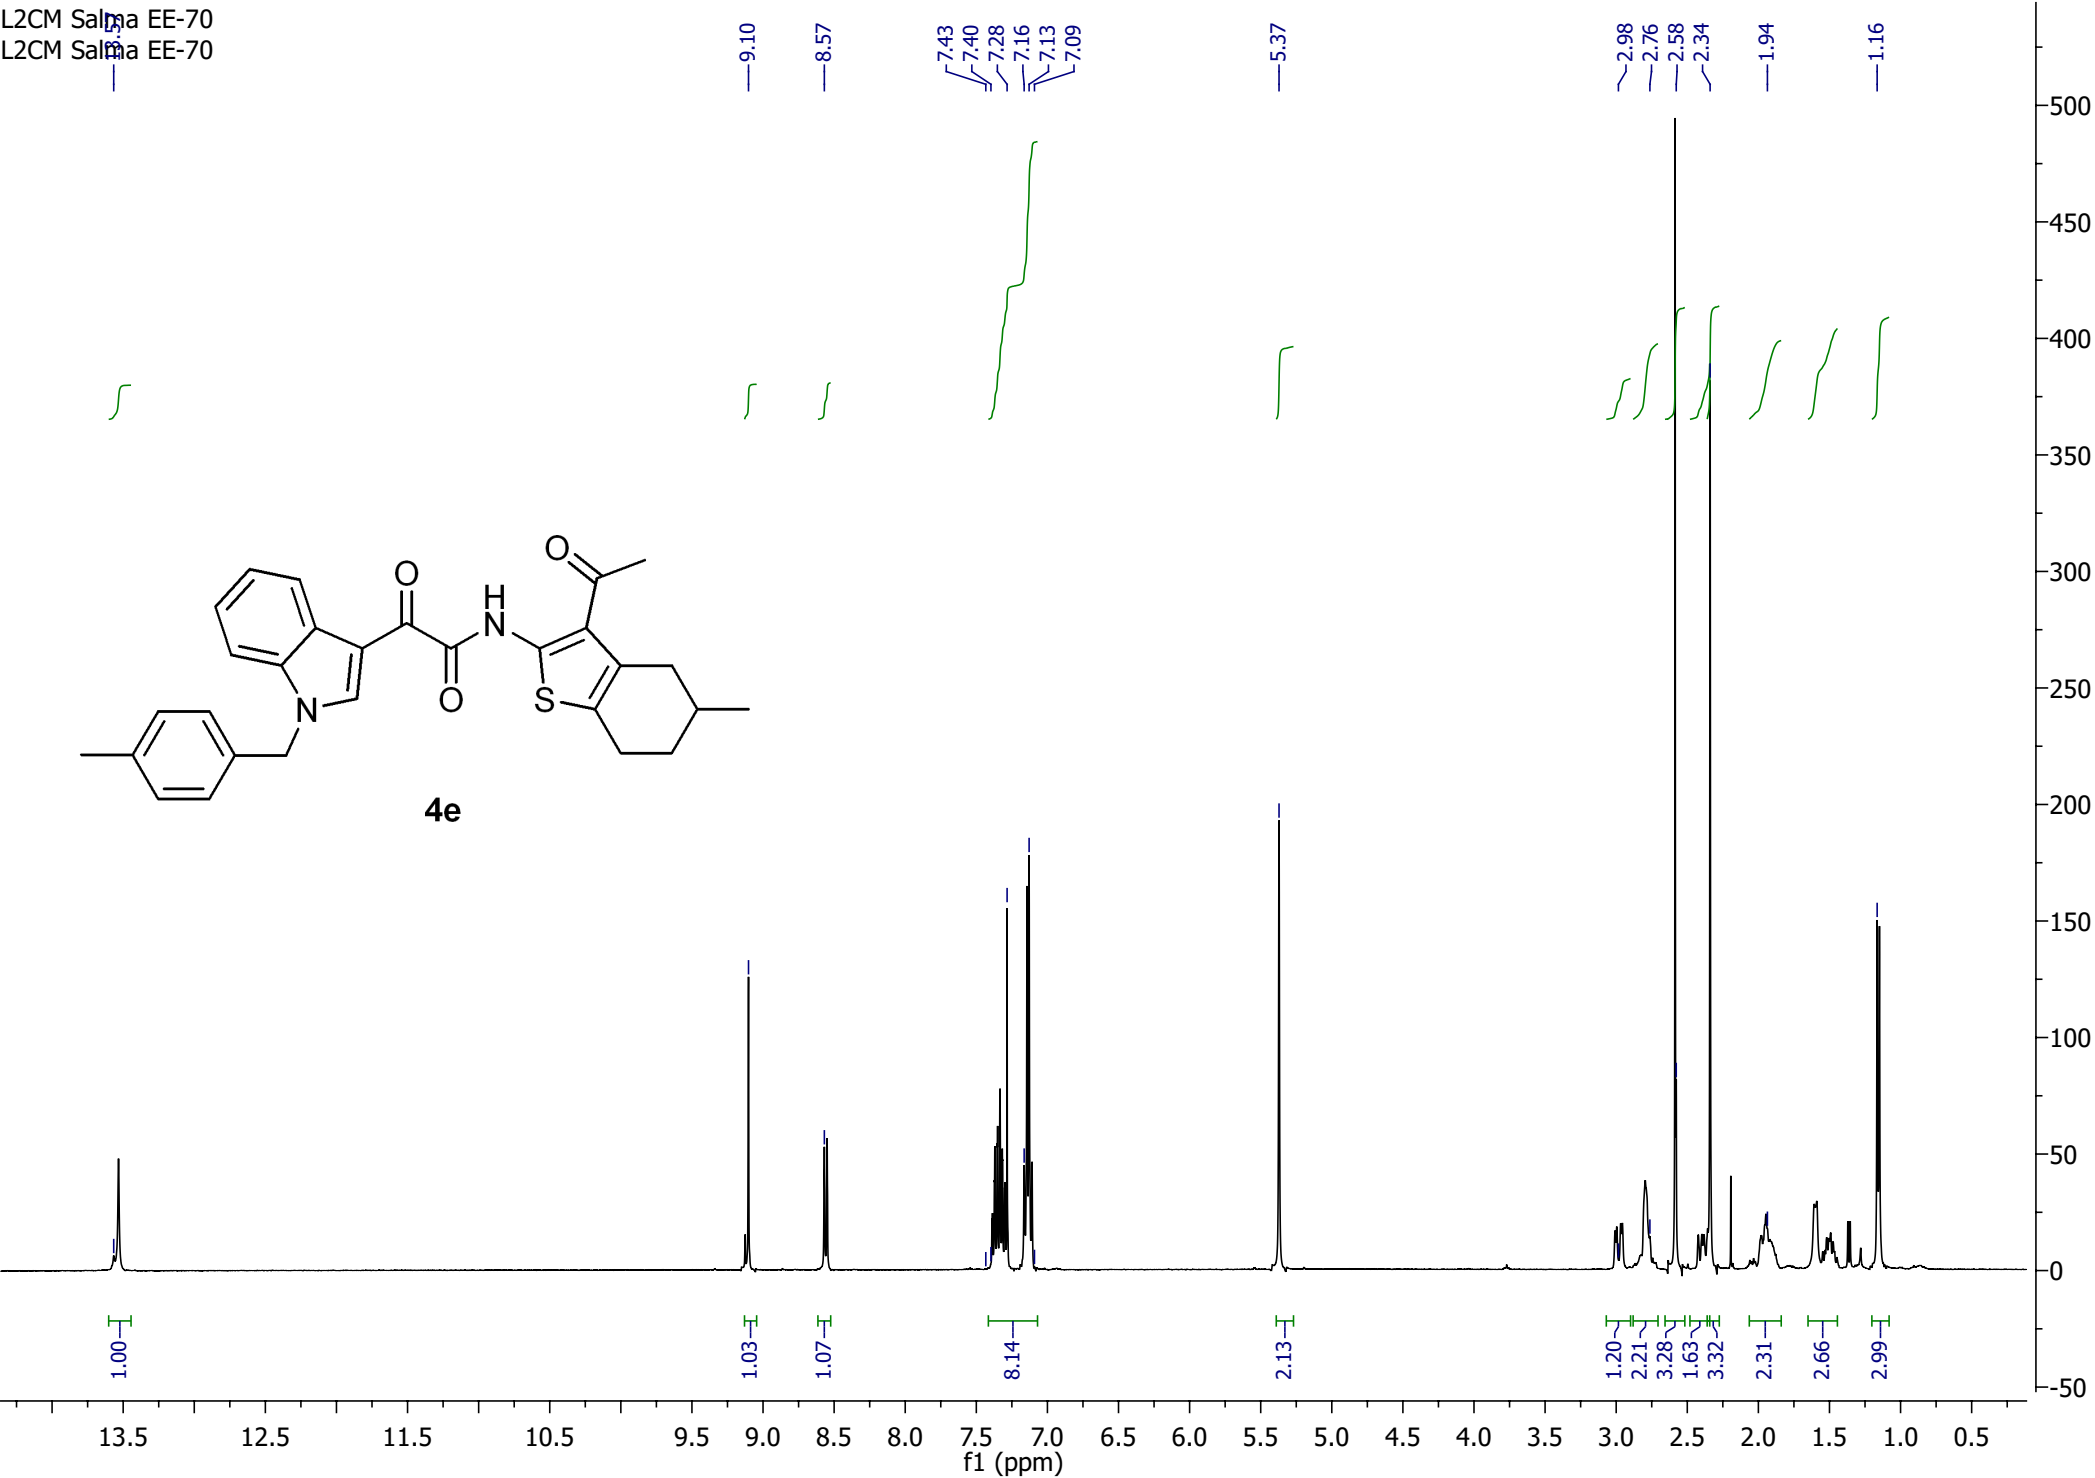

L2CM Salma EE-70 13C

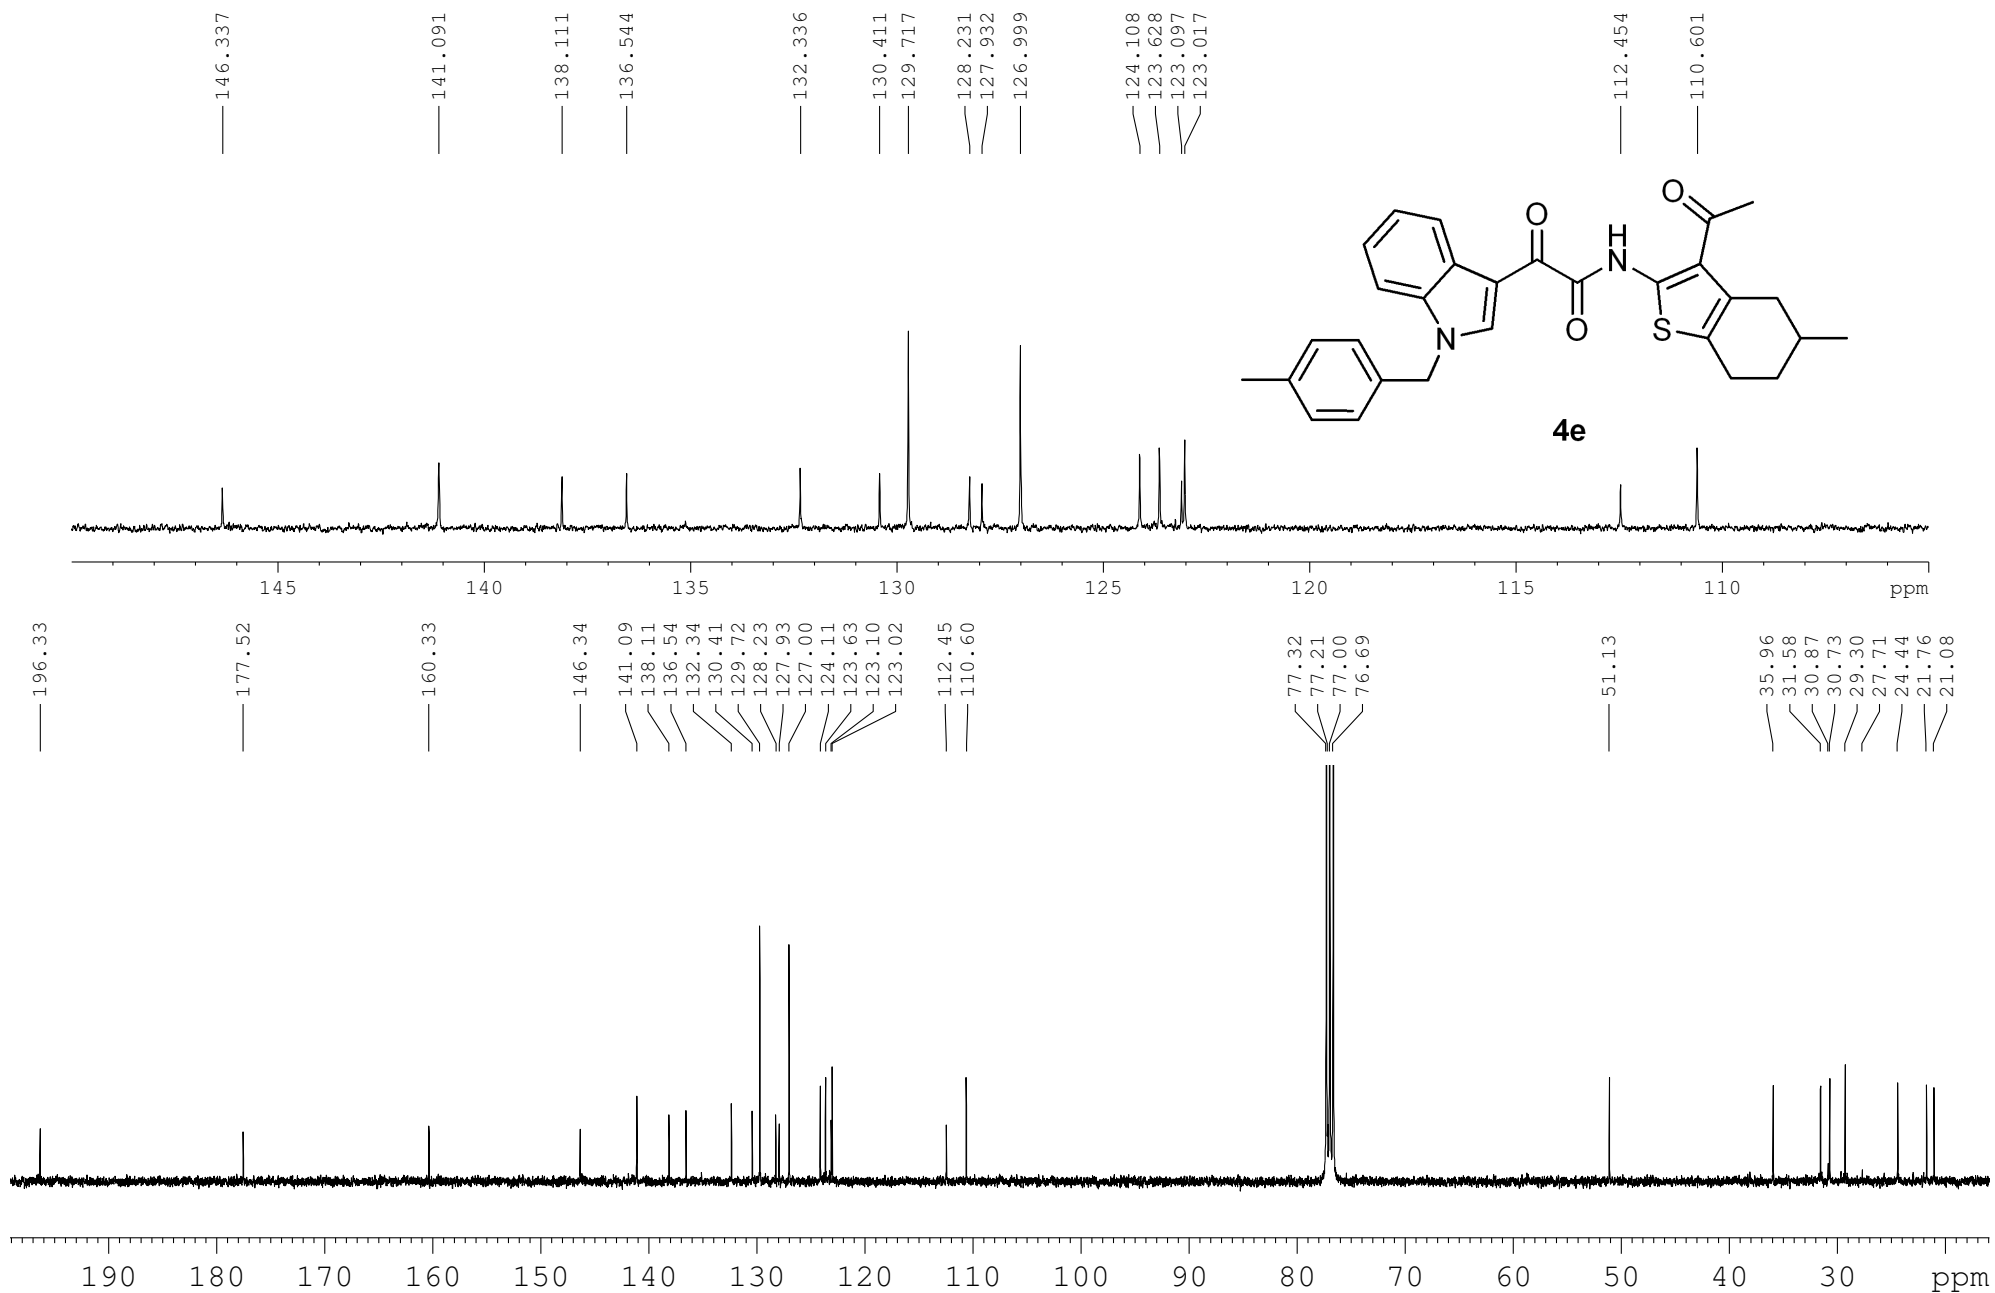

# Mass Spectrum SmartFormula Report

## Analysis Info

Analysis Name D:\Data\2018\180924000002.d  
 Method Tuneposlow.m  
 Sample Name 180913806///EE-70  
 Comment MeOH/CH<sub>2</sub>Cl<sub>2</sub>

Acquisition Date 9/24/2018 12:02:18 PM

Operator fabien  
 Instrument micrOTOF-Q 228888.00098

## Acquisition Parameter

|             |            |                       |           |                  |           |
|-------------|------------|-----------------------|-----------|------------------|-----------|
| Source Type | ESI        | Ion Polarity          | Positive  | Set Nebulizer    | 1.0 Bar   |
| Focus       | Not active | Set Capillary         | 4500 V    | Set Dry Heater   | 190 °C    |
| Scan Begin  | 50 m/z     | Set End Plate Offset  | -500 V    | Set Dry Gas      | 4.0 l/min |
| Scan End    | 3000 m/z   | Set Collision Cell RF | 250.0 Vpp | Set Divert Valve | Source    |

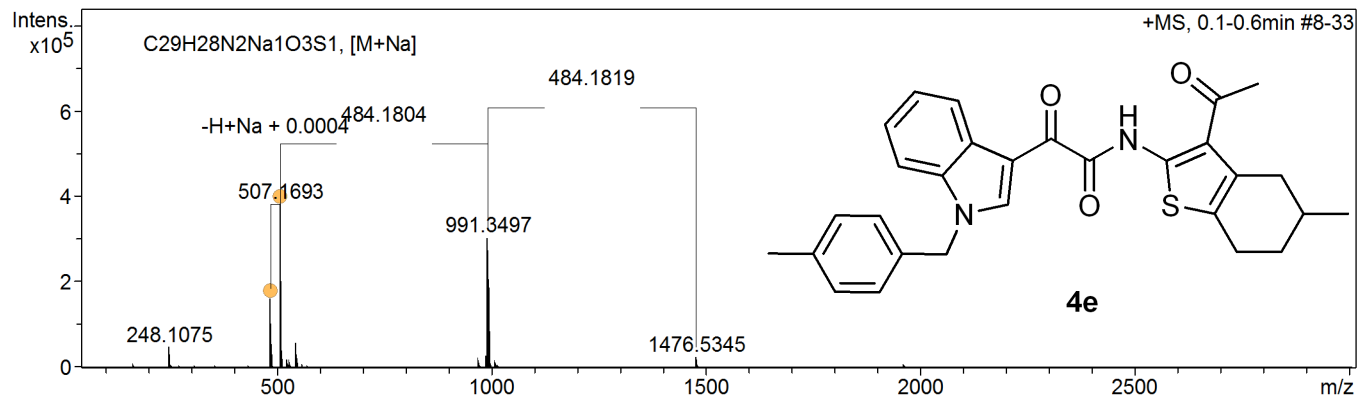

| Meas. m/z | # | Ion Formula                                                       | m/z      | err  [mDa] | err [ppm] | mSigma | # mSigma | Score  | rdb  | e <sup>-</sup> | Conf | N-Rule |
|-----------|---|-------------------------------------------------------------------|----------|------------|-----------|--------|----------|--------|------|----------------|------|--------|
| 485.1869  | 1 | C <sub>29</sub> H <sub>29</sub> N <sub>2</sub> O <sub>3</sub> S   | 485.1893 | 2.4        | 5.0       | 2.7    | 1        | 100.00 | 16.5 | even           |      | ok     |
| 507.1693  | 1 | C <sub>29</sub> H <sub>28</sub> N <sub>2</sub> NaO <sub>3</sub> S | 507.1713 | 2.0        | 4.0       | 2.6    | 1        | 100.00 | 16.5 | even           |      | ok     |



L2CM Salma EE-71  
L2CM Salma EE-71

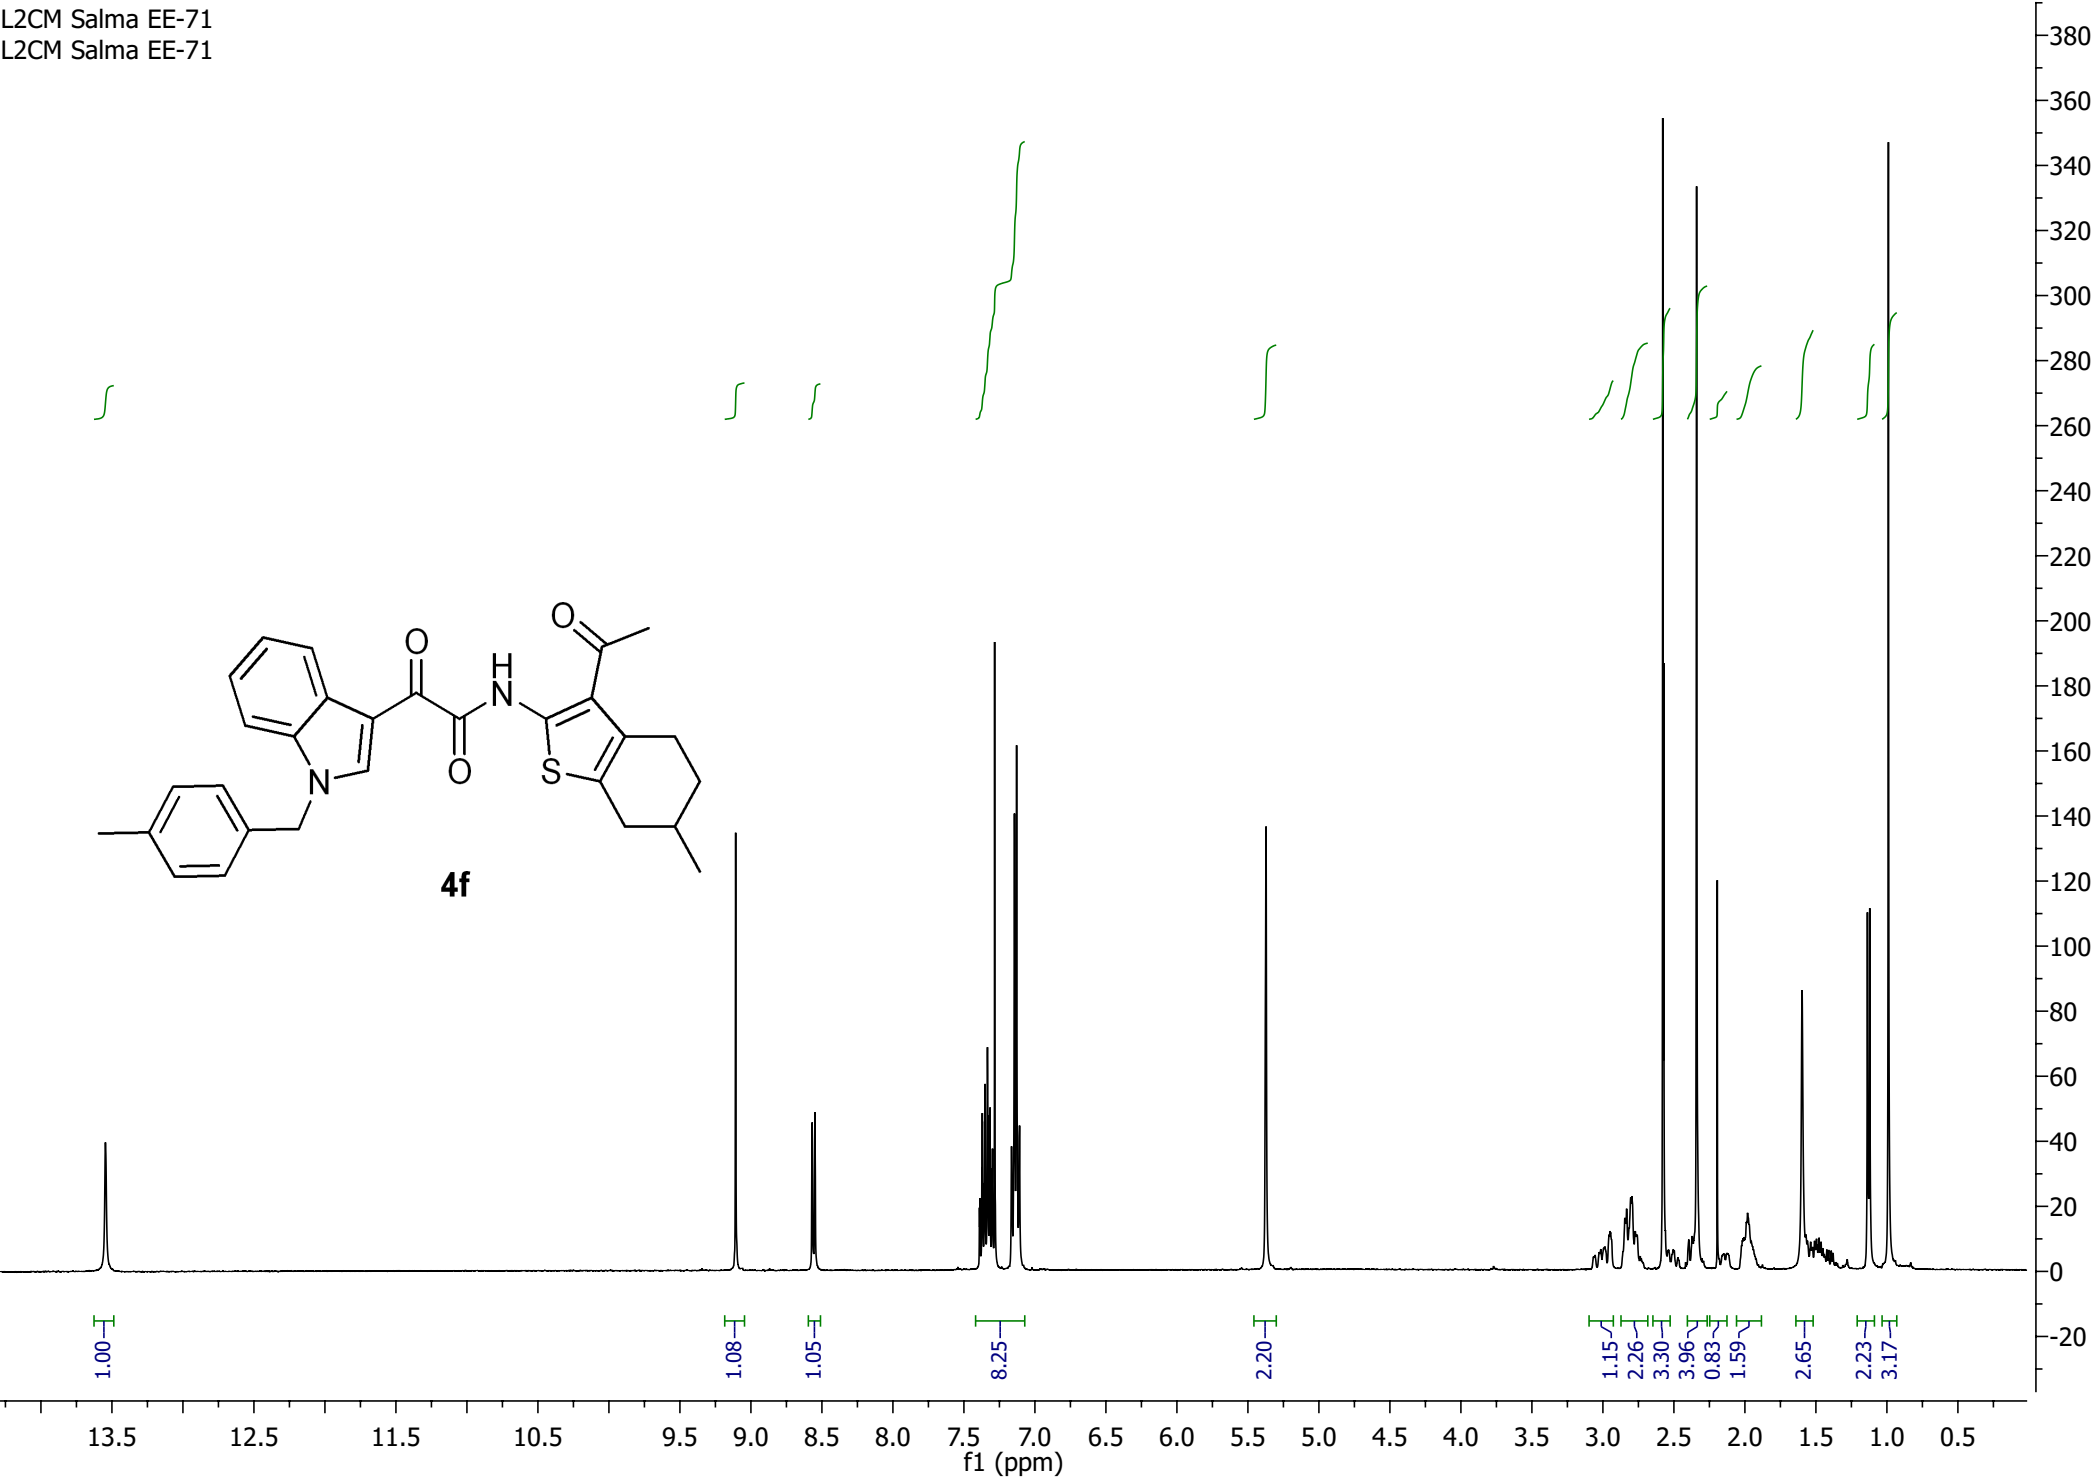

L2CM Salma EE-71

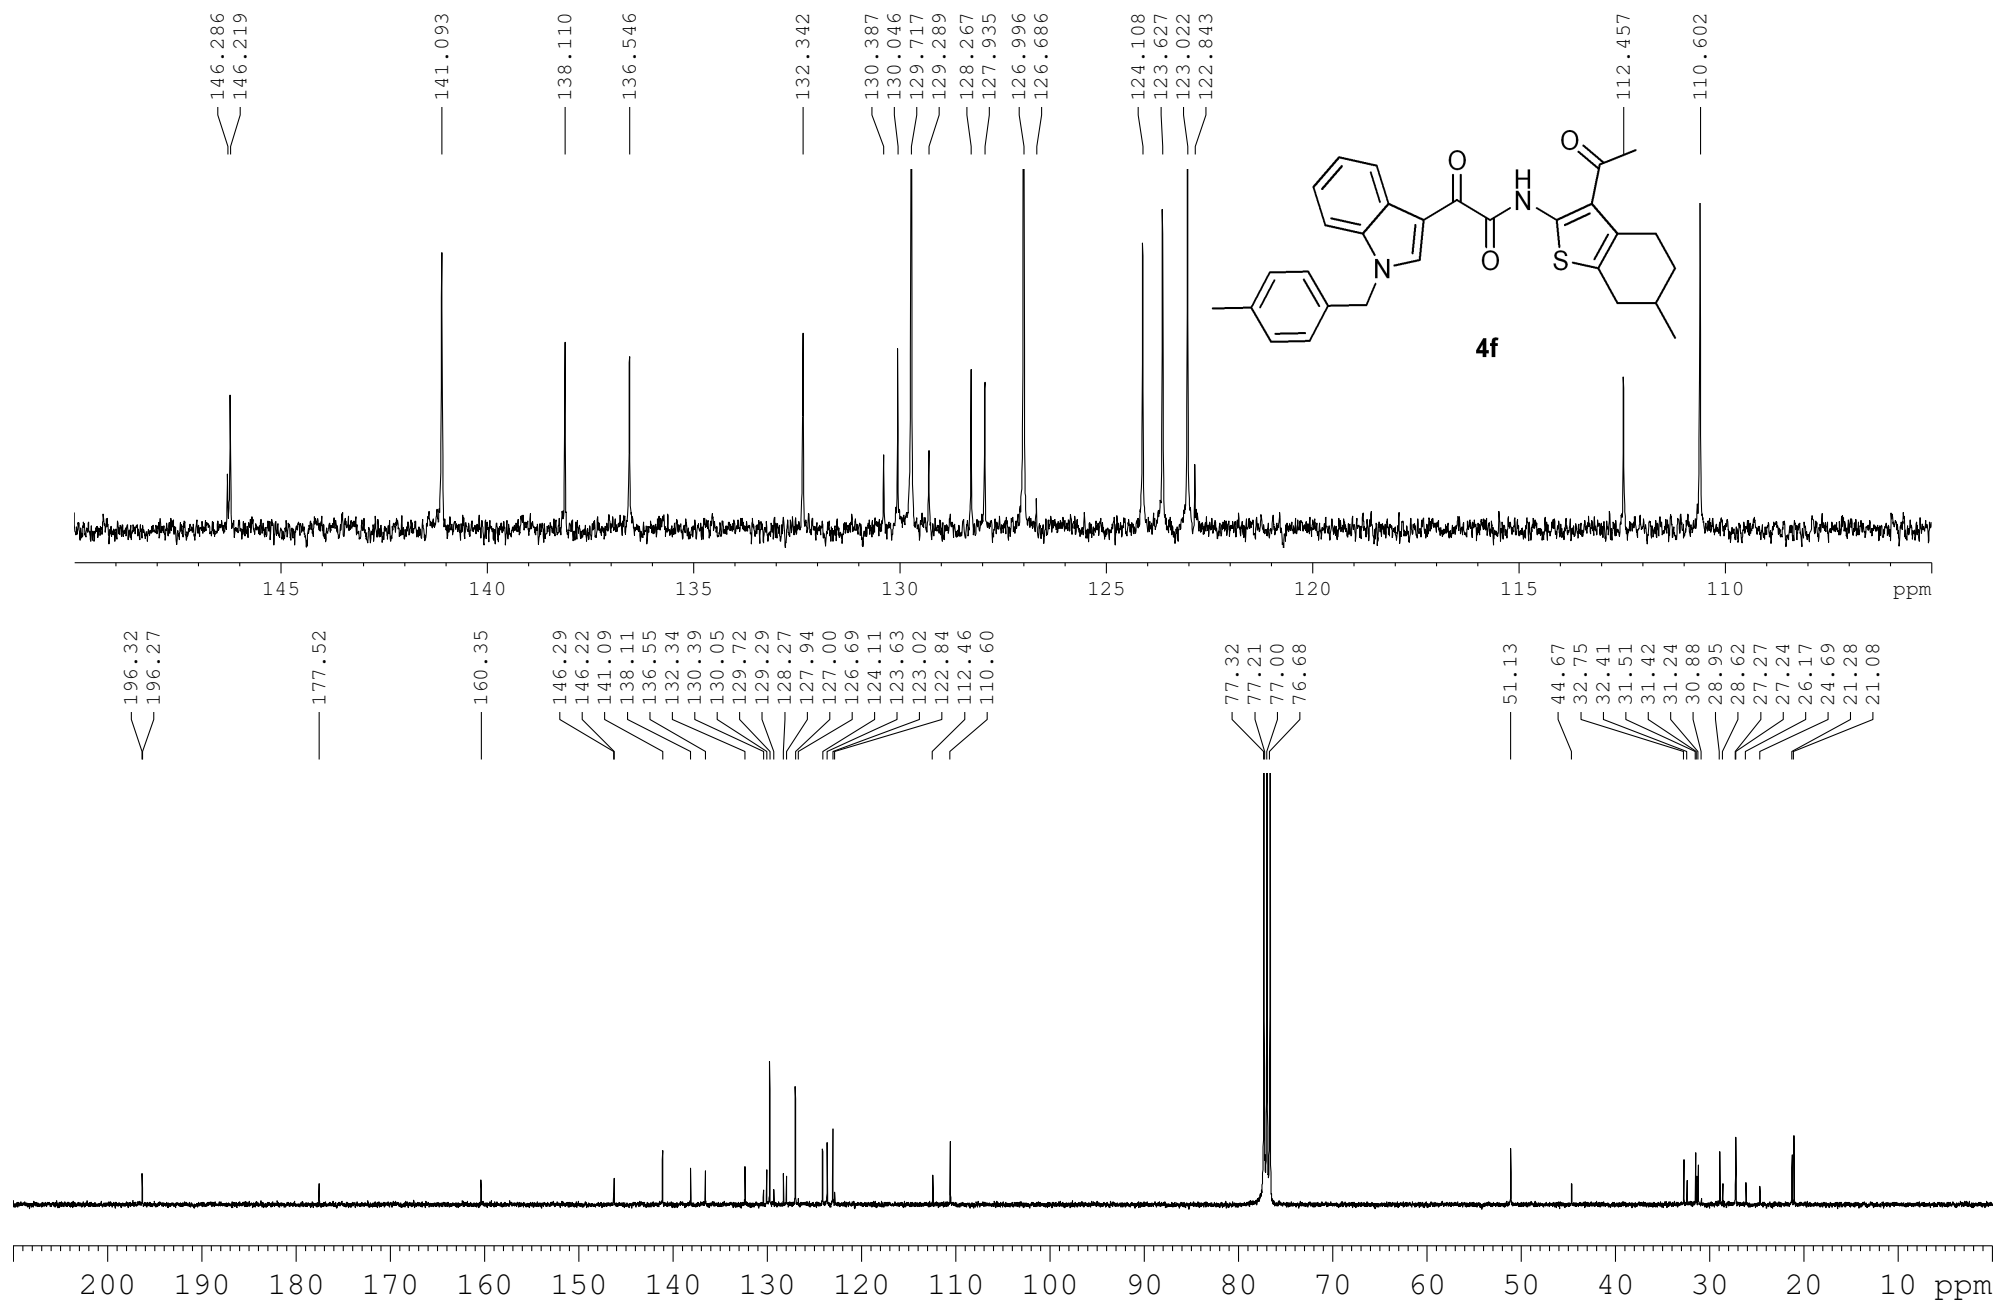

L2CM Salma EE-72  
L2CM Salma EE-72

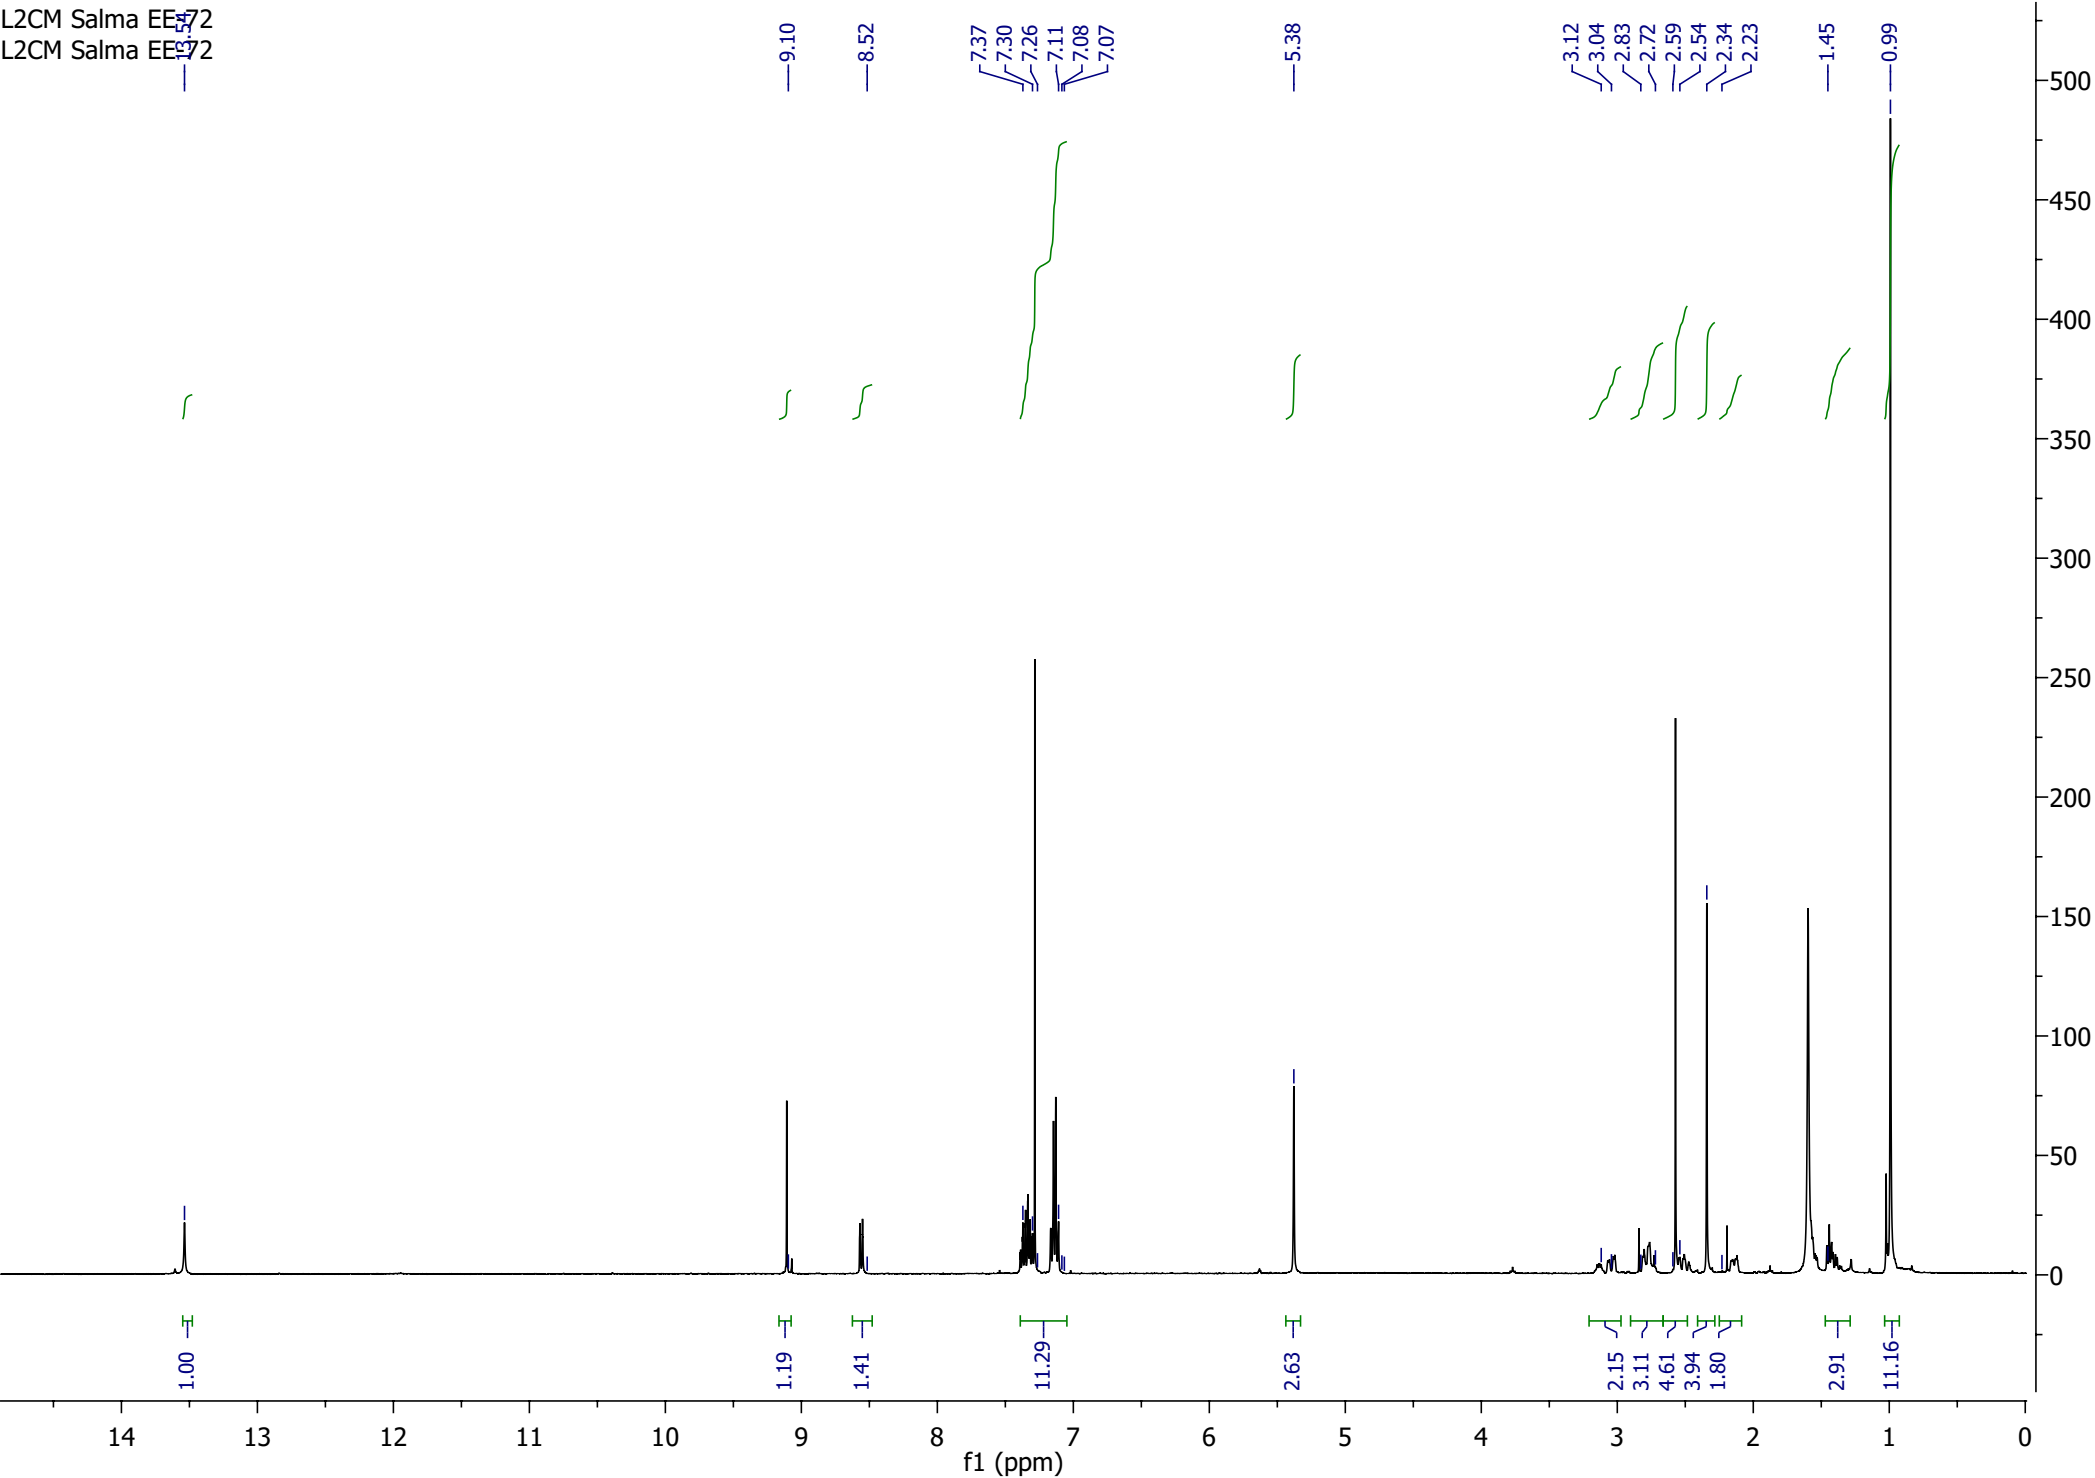

L2CM Salma EE-72

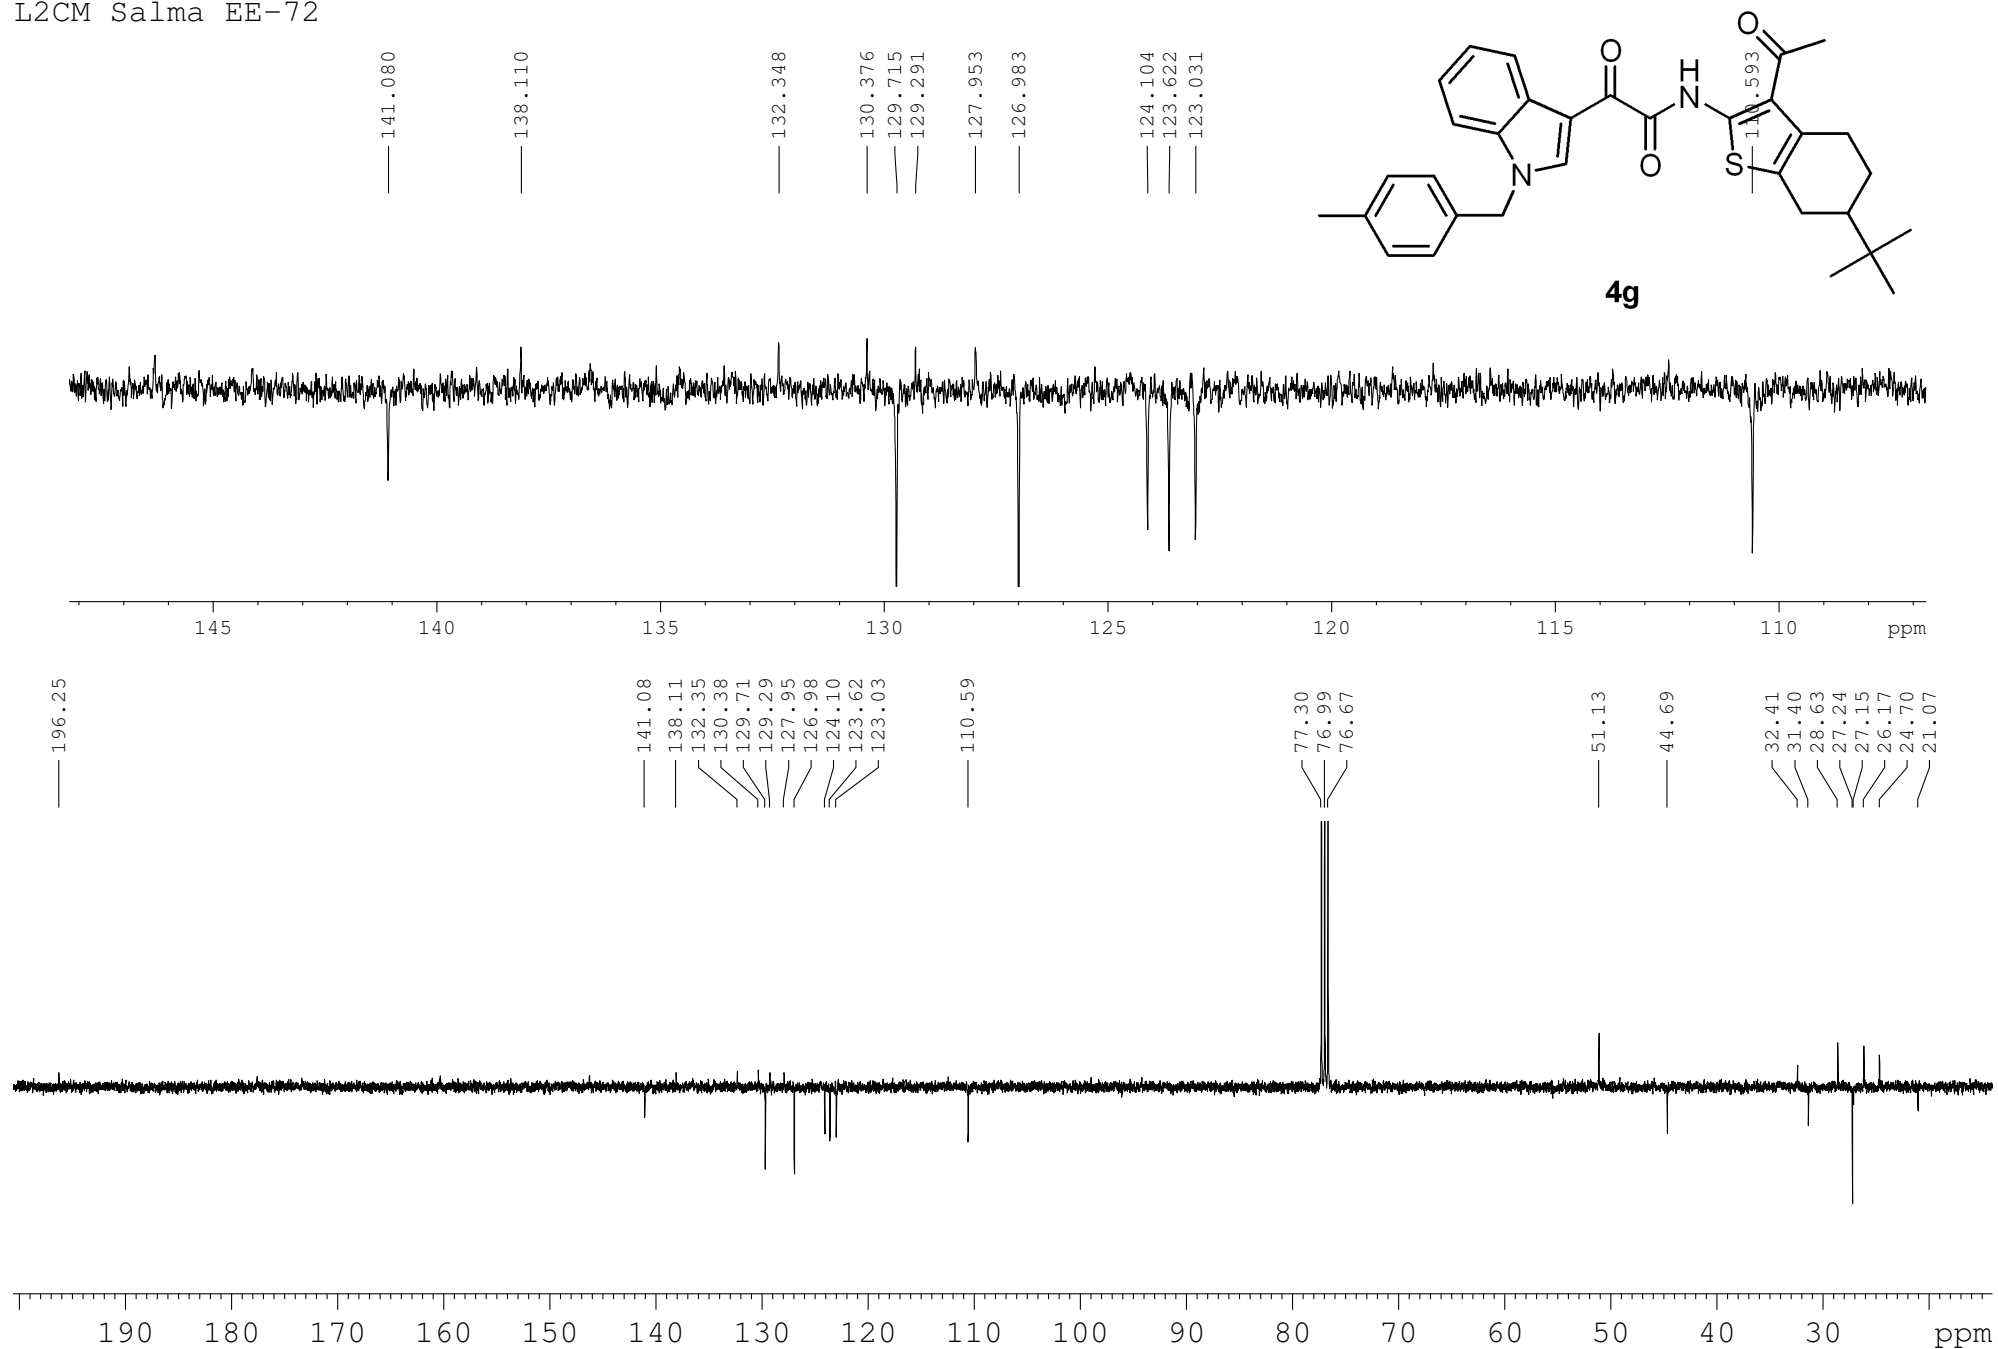

L2CM Salma EE-73  
L2CM Salma EE-73

10.83  
10.41

8.89

8.21

7.67

7.65

7.36

7.34

7.22

7.20

7.17

7.15

5.56

3.83

3.33

2.52

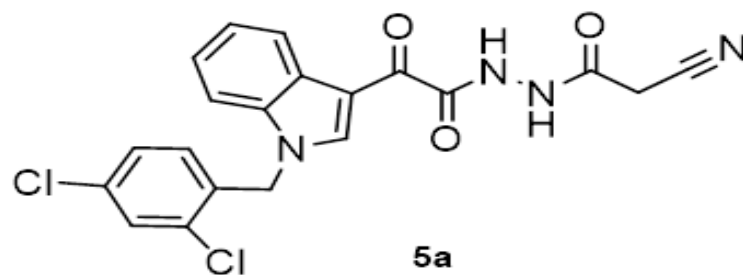

**5a**

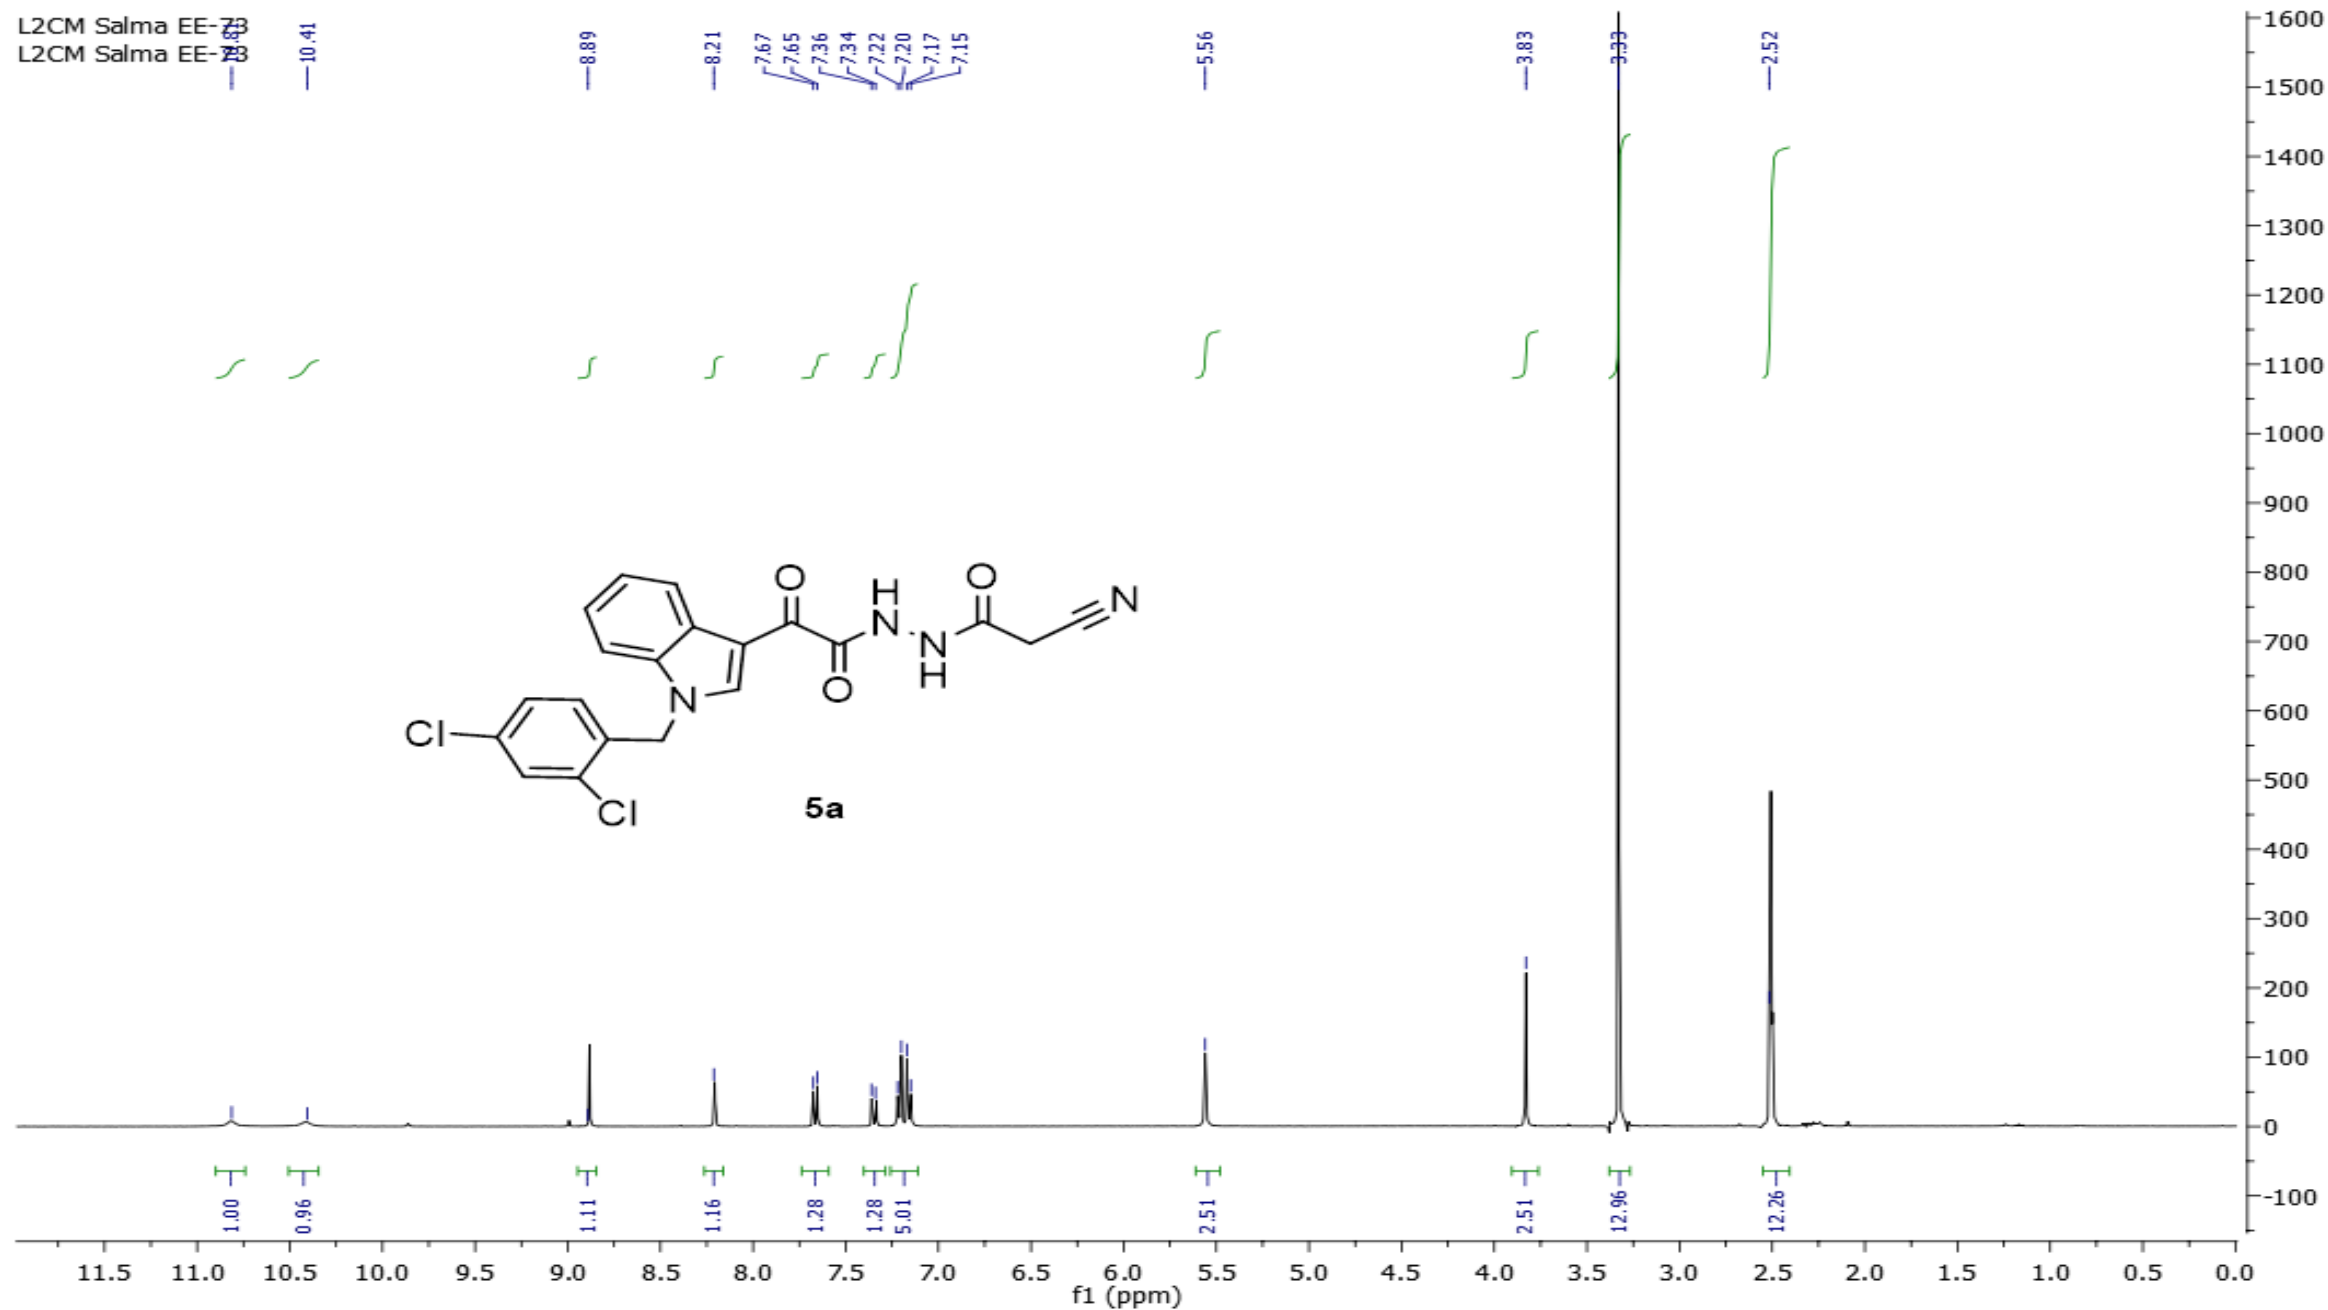

L2cm Salms -73  
L2cm Salms -73

162.03  
161.47

141.95  
137.40  
135.07  
133.25  
129.46  
129.37  
129.31  
128.14  
127.86  
127.56  
127.47  
123.90  
120.66  
115.55  
113.56  
111.24

69.79

50.04  
45.84  
40.31  
40.10  
39.90  
39.69  
39.48  
39.27  
39.06

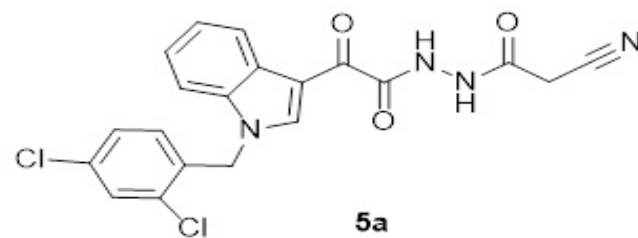

190 180 170 160 150 140 130 120 110 100 90 80 70 60 50 40 30 20 10 0  
f1 (ppm)

1E+05  
1E+05  
1E+05  
1E+05  
1E+05  
90000  
80000  
70000  
60000  
50000  
40000  
30000  
20000  
10000  
0  
-10000

L2CM Salma A-74  
L2CM Salma A-74

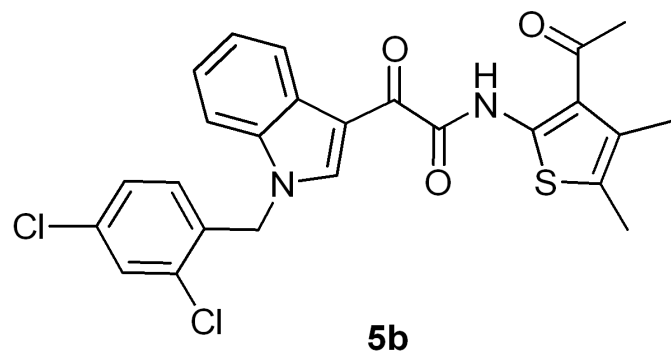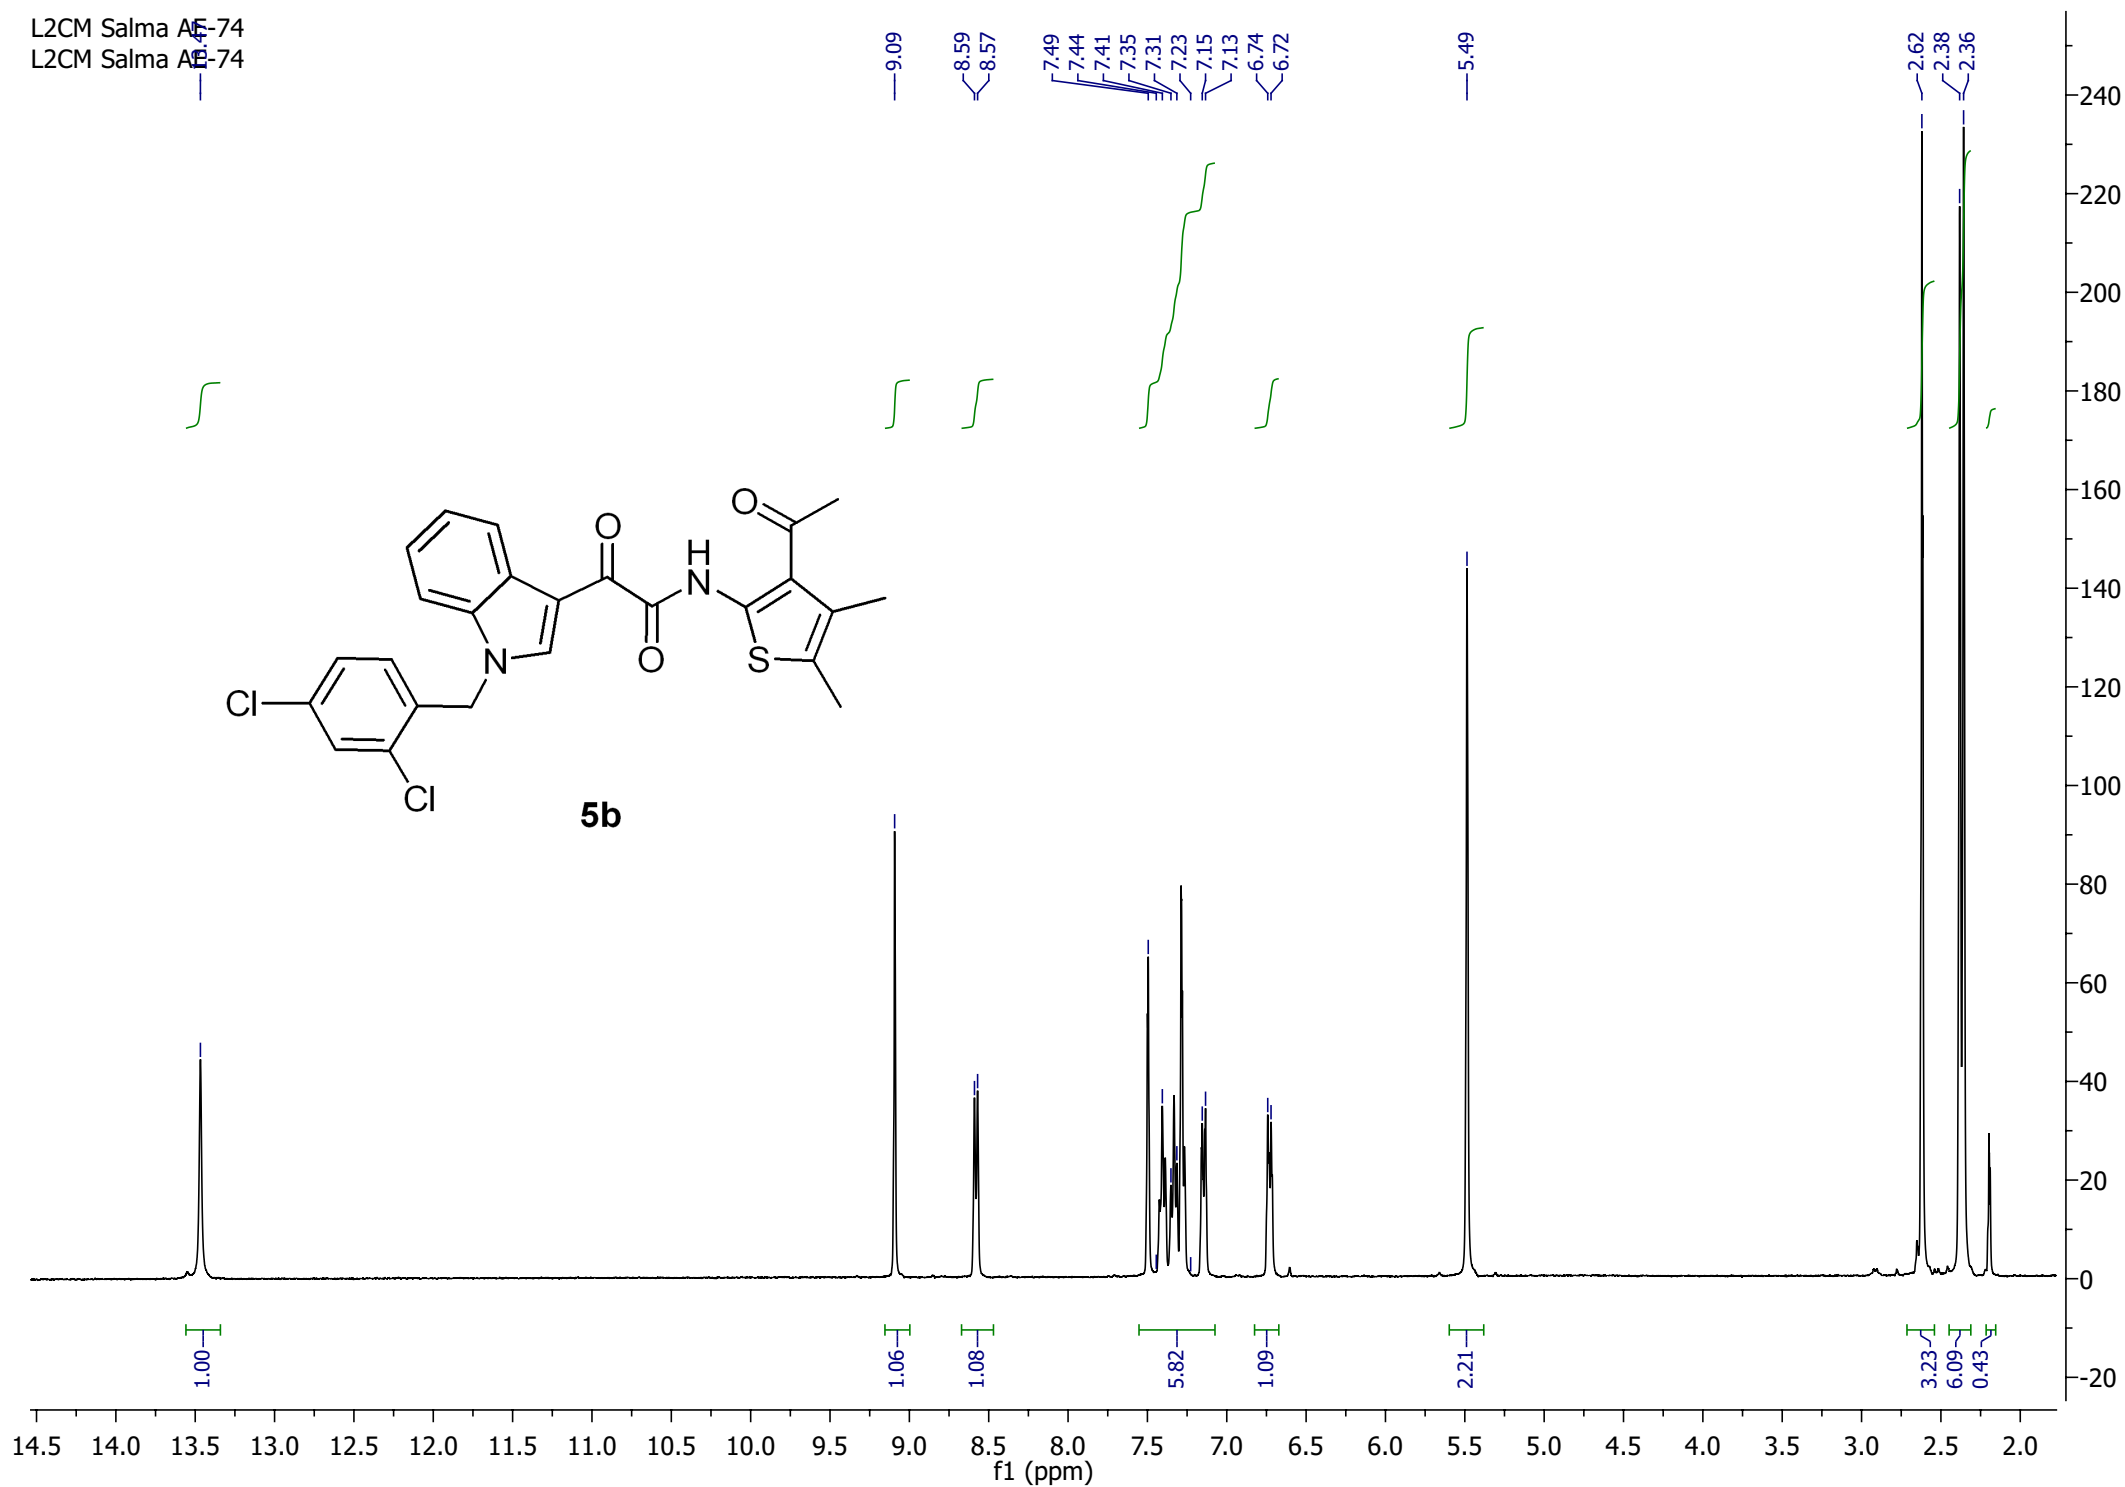

L2CM Salma EE-74  
L2CM Salma EE-74 13cpd

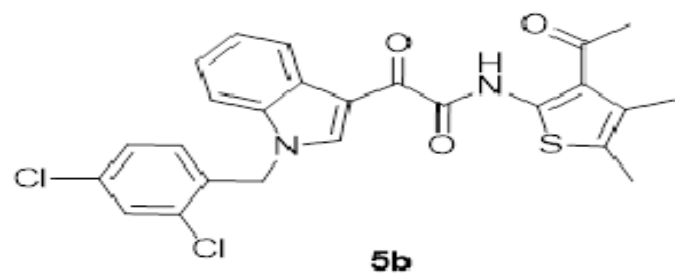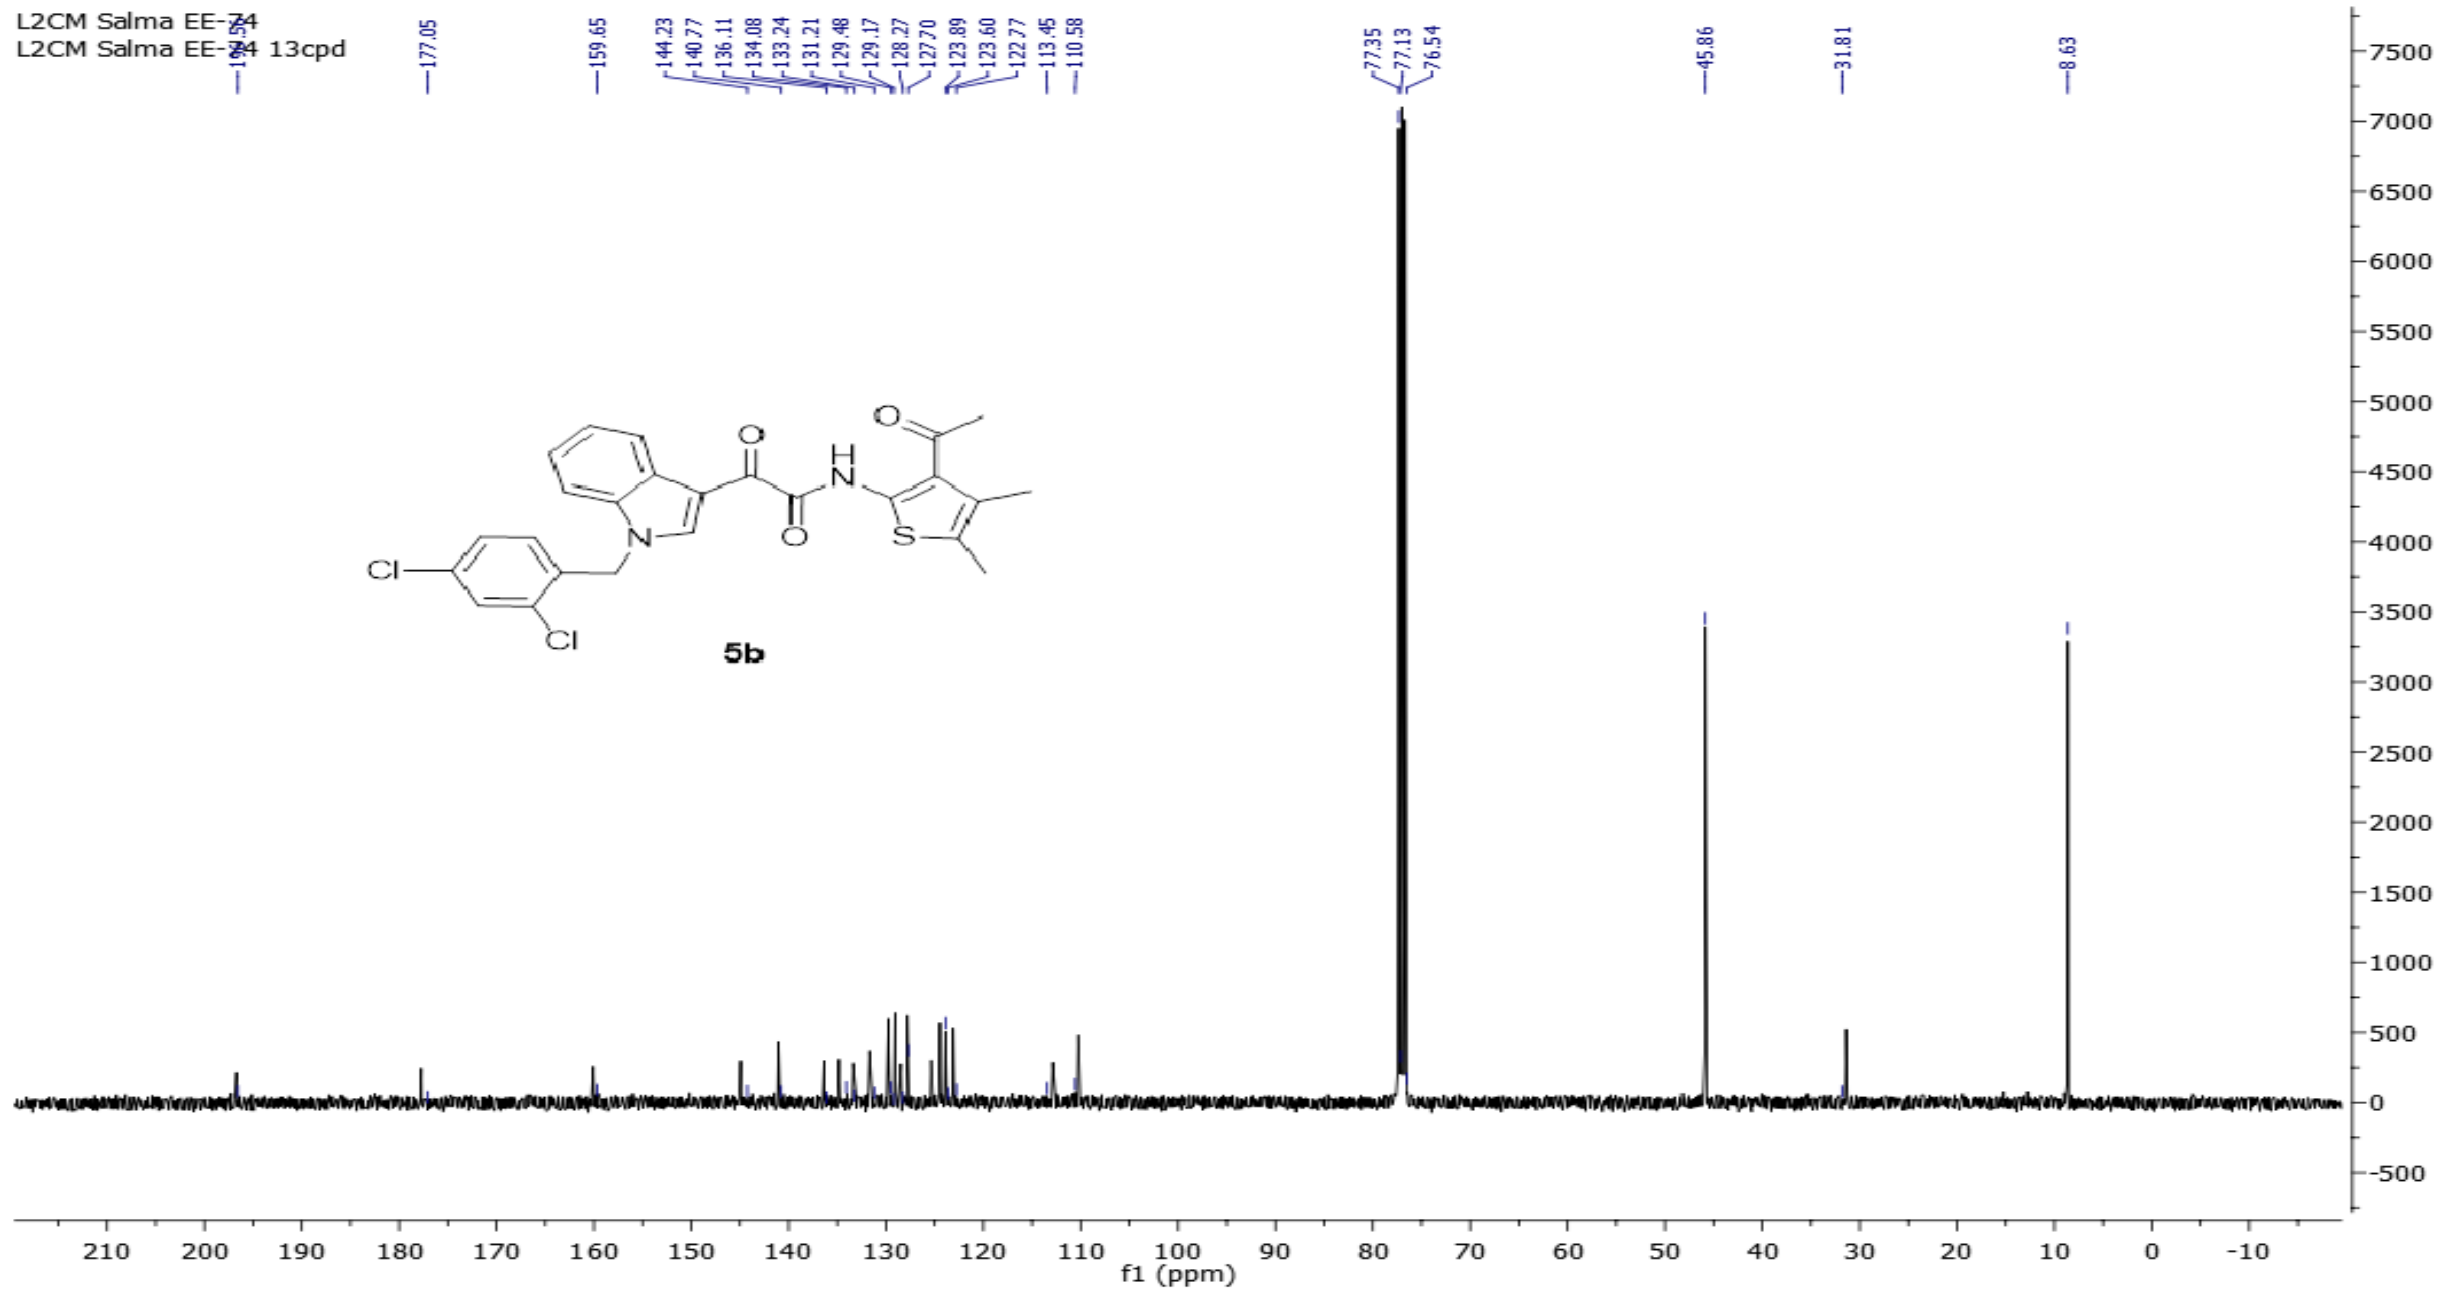



L2CM Salma EE-75  
L2CM Salma EE-75

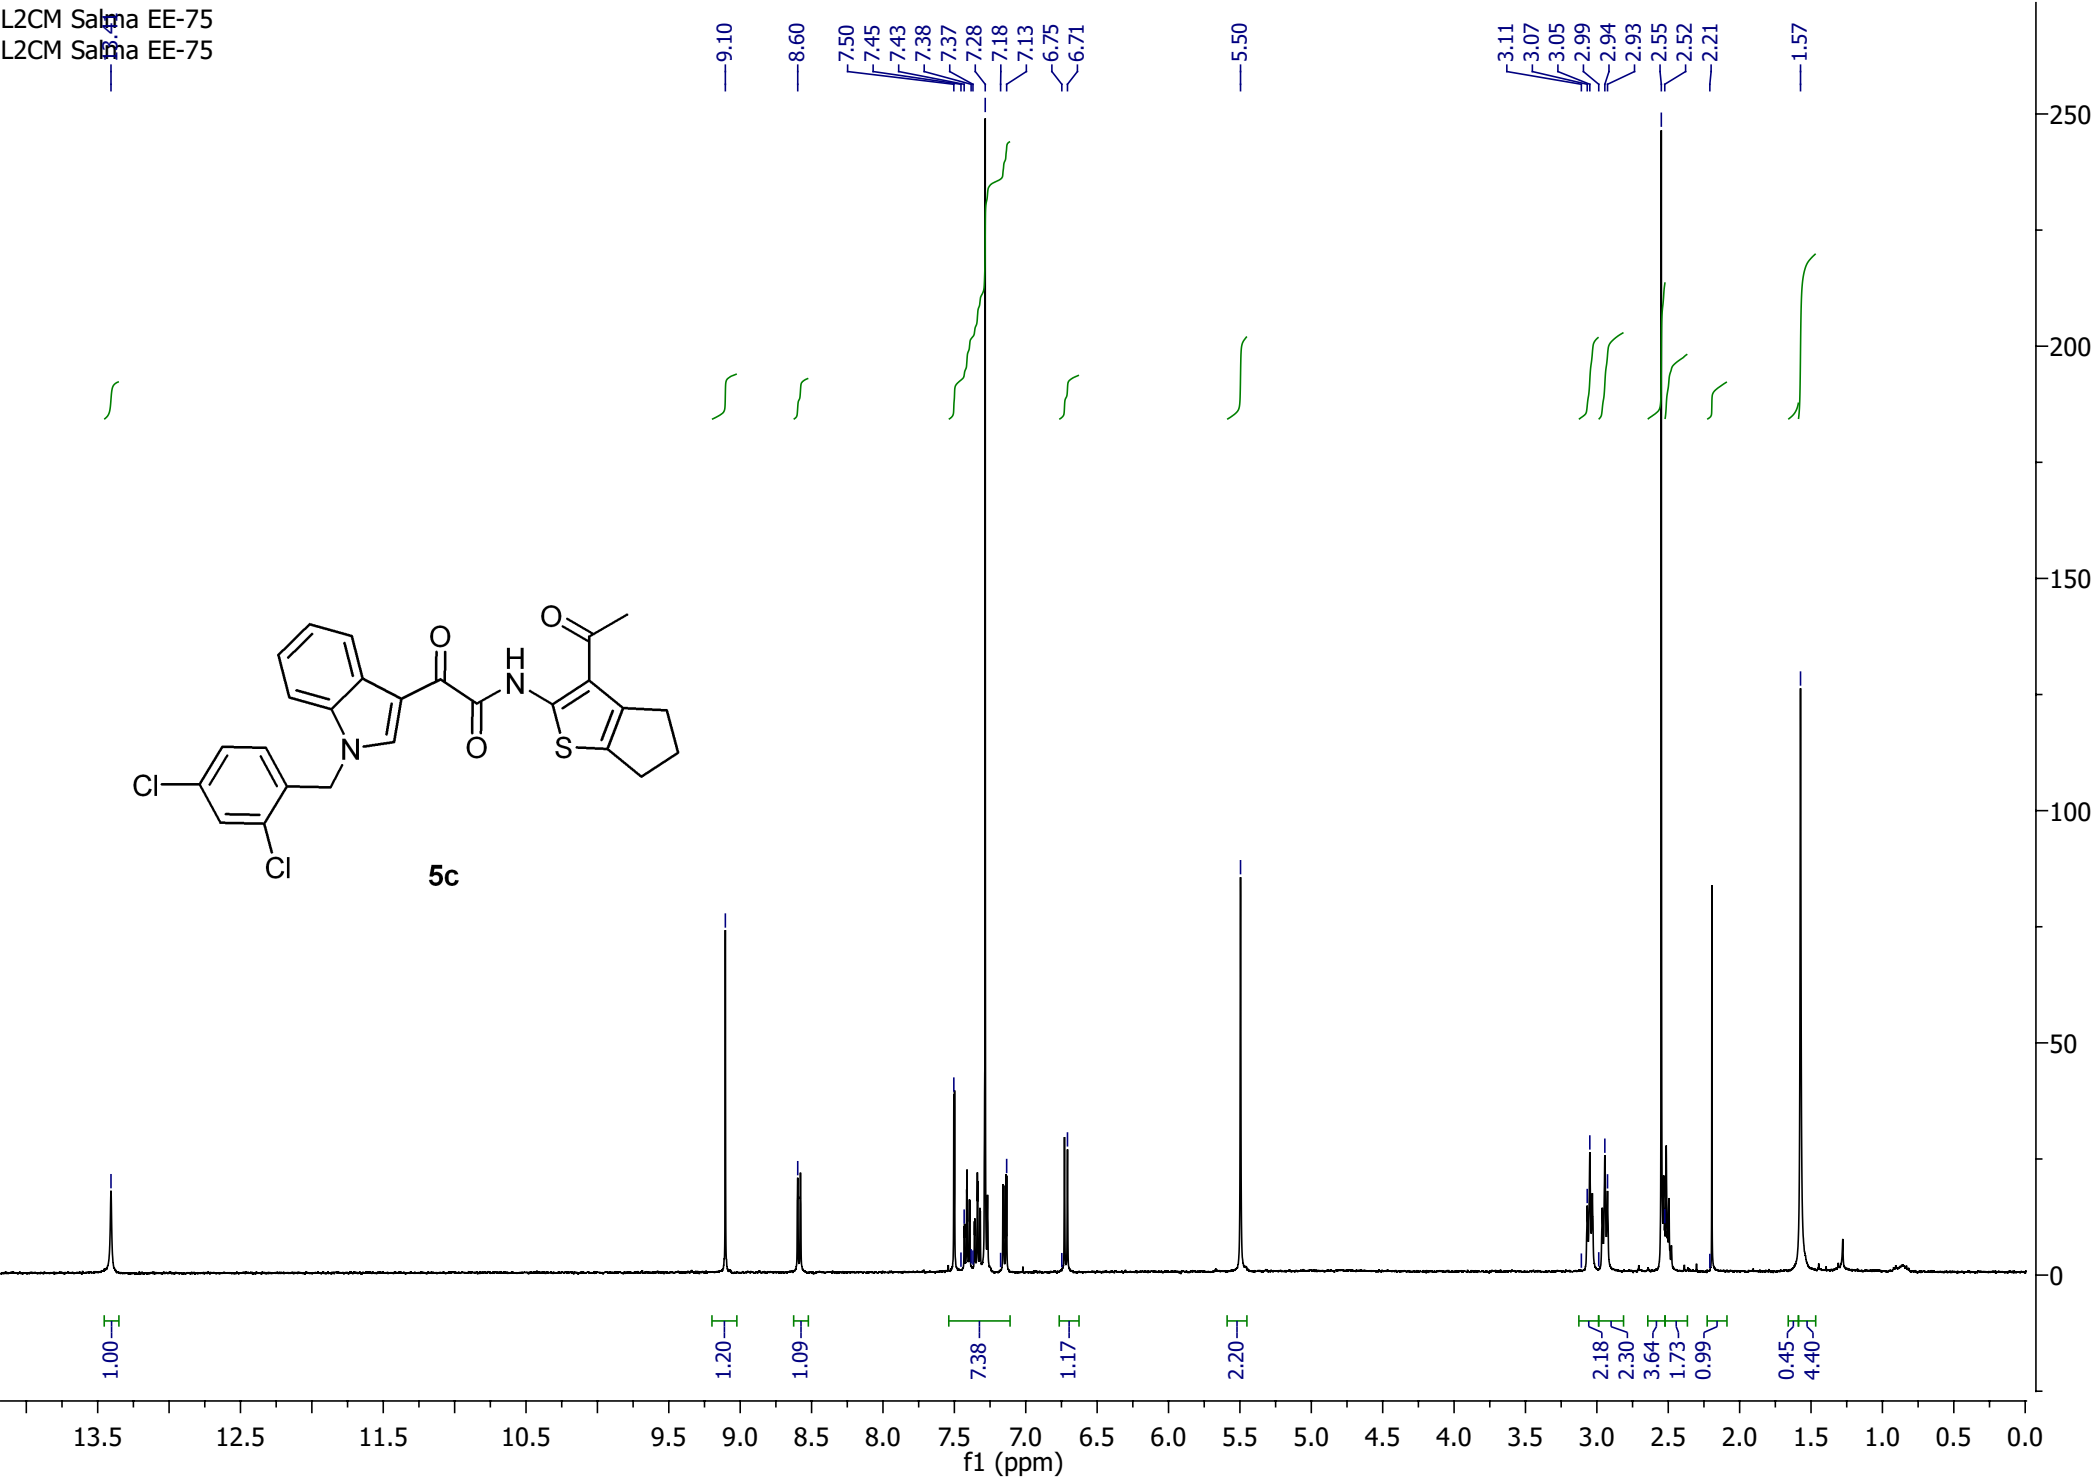

# Mass Spectrum SmartFormula Report

## Analysis Info

Analysis Name D:\Data\2018\180924000005.d  
Method Tuneposlow.m  
Sample Name 180913809///EE-75  
Comment MeOH/CH<sub>2</sub>Cl<sub>2</sub>

Acquisition Date 9/24/2018 1:42:55 PM

Operator fabien  
Instrument micrOTOF-Q 228888.00098

## Acquisition Parameter

|             |            |                       |           |                  |           |
|-------------|------------|-----------------------|-----------|------------------|-----------|
| Source Type | ESI        | Ion Polarity          | Positive  | Set Nebulizer    | 1.0 Bar   |
| Focus       | Not active | Set Capillary         | 4500 V    | Set Dry Heater   | 190 °C    |
| Scan Begin  | 50 m/z     | Set End Plate Offset  | -500 V    | Set Dry Gas      | 4.0 l/min |
| Scan End    | 3000 m/z   | Set Collision Cell RF | 250.0 Vpp | Set Divert Valve | Source    |

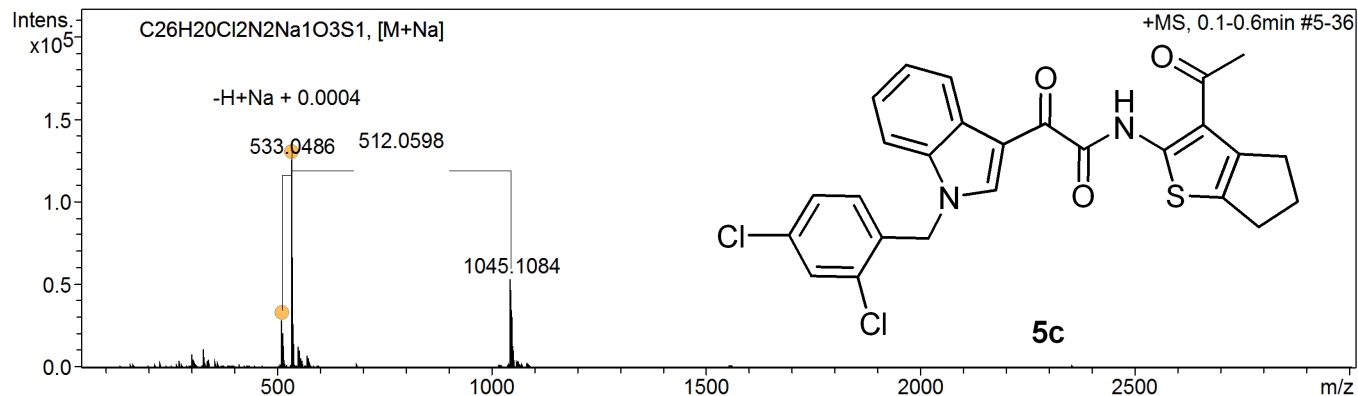

| Meas. m/z | # | Ion Formula                                                                       | m/z      | [err] [mDa] | err [ppm] | mSigma | # mSigma | Score  | rdb  | e <sup>-</sup> | Conf | N-Rule |
|-----------|---|-----------------------------------------------------------------------------------|----------|-------------|-----------|--------|----------|--------|------|----------------|------|--------|
| 511.0662  | 1 | C <sub>26</sub> H <sub>21</sub> Cl <sub>2</sub> N <sub>2</sub> O <sub>3</sub> S   | 511.0644 | 1.8         | -3.4      | 3.2    | 1        | 100.00 | 16.5 | even           |      | ok     |
| 533.0486  | 1 | C <sub>26</sub> H <sub>20</sub> Cl <sub>2</sub> N <sub>2</sub> NaO <sub>3</sub> S | 533.0464 | 2.2         | -4.1      | 0.7    | 1        | 100.00 | 16.5 | even           |      | ok     |

L2CM Salma EE-76  
L2CM Salma EE-76

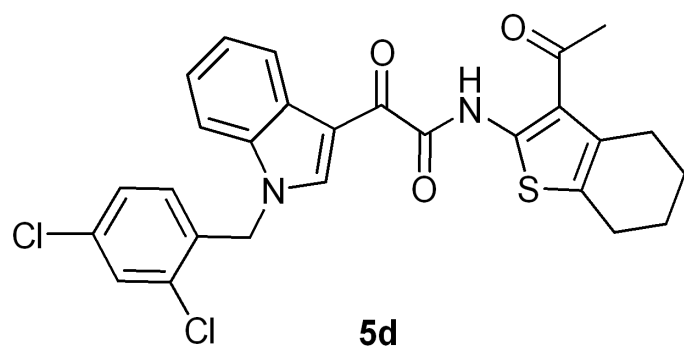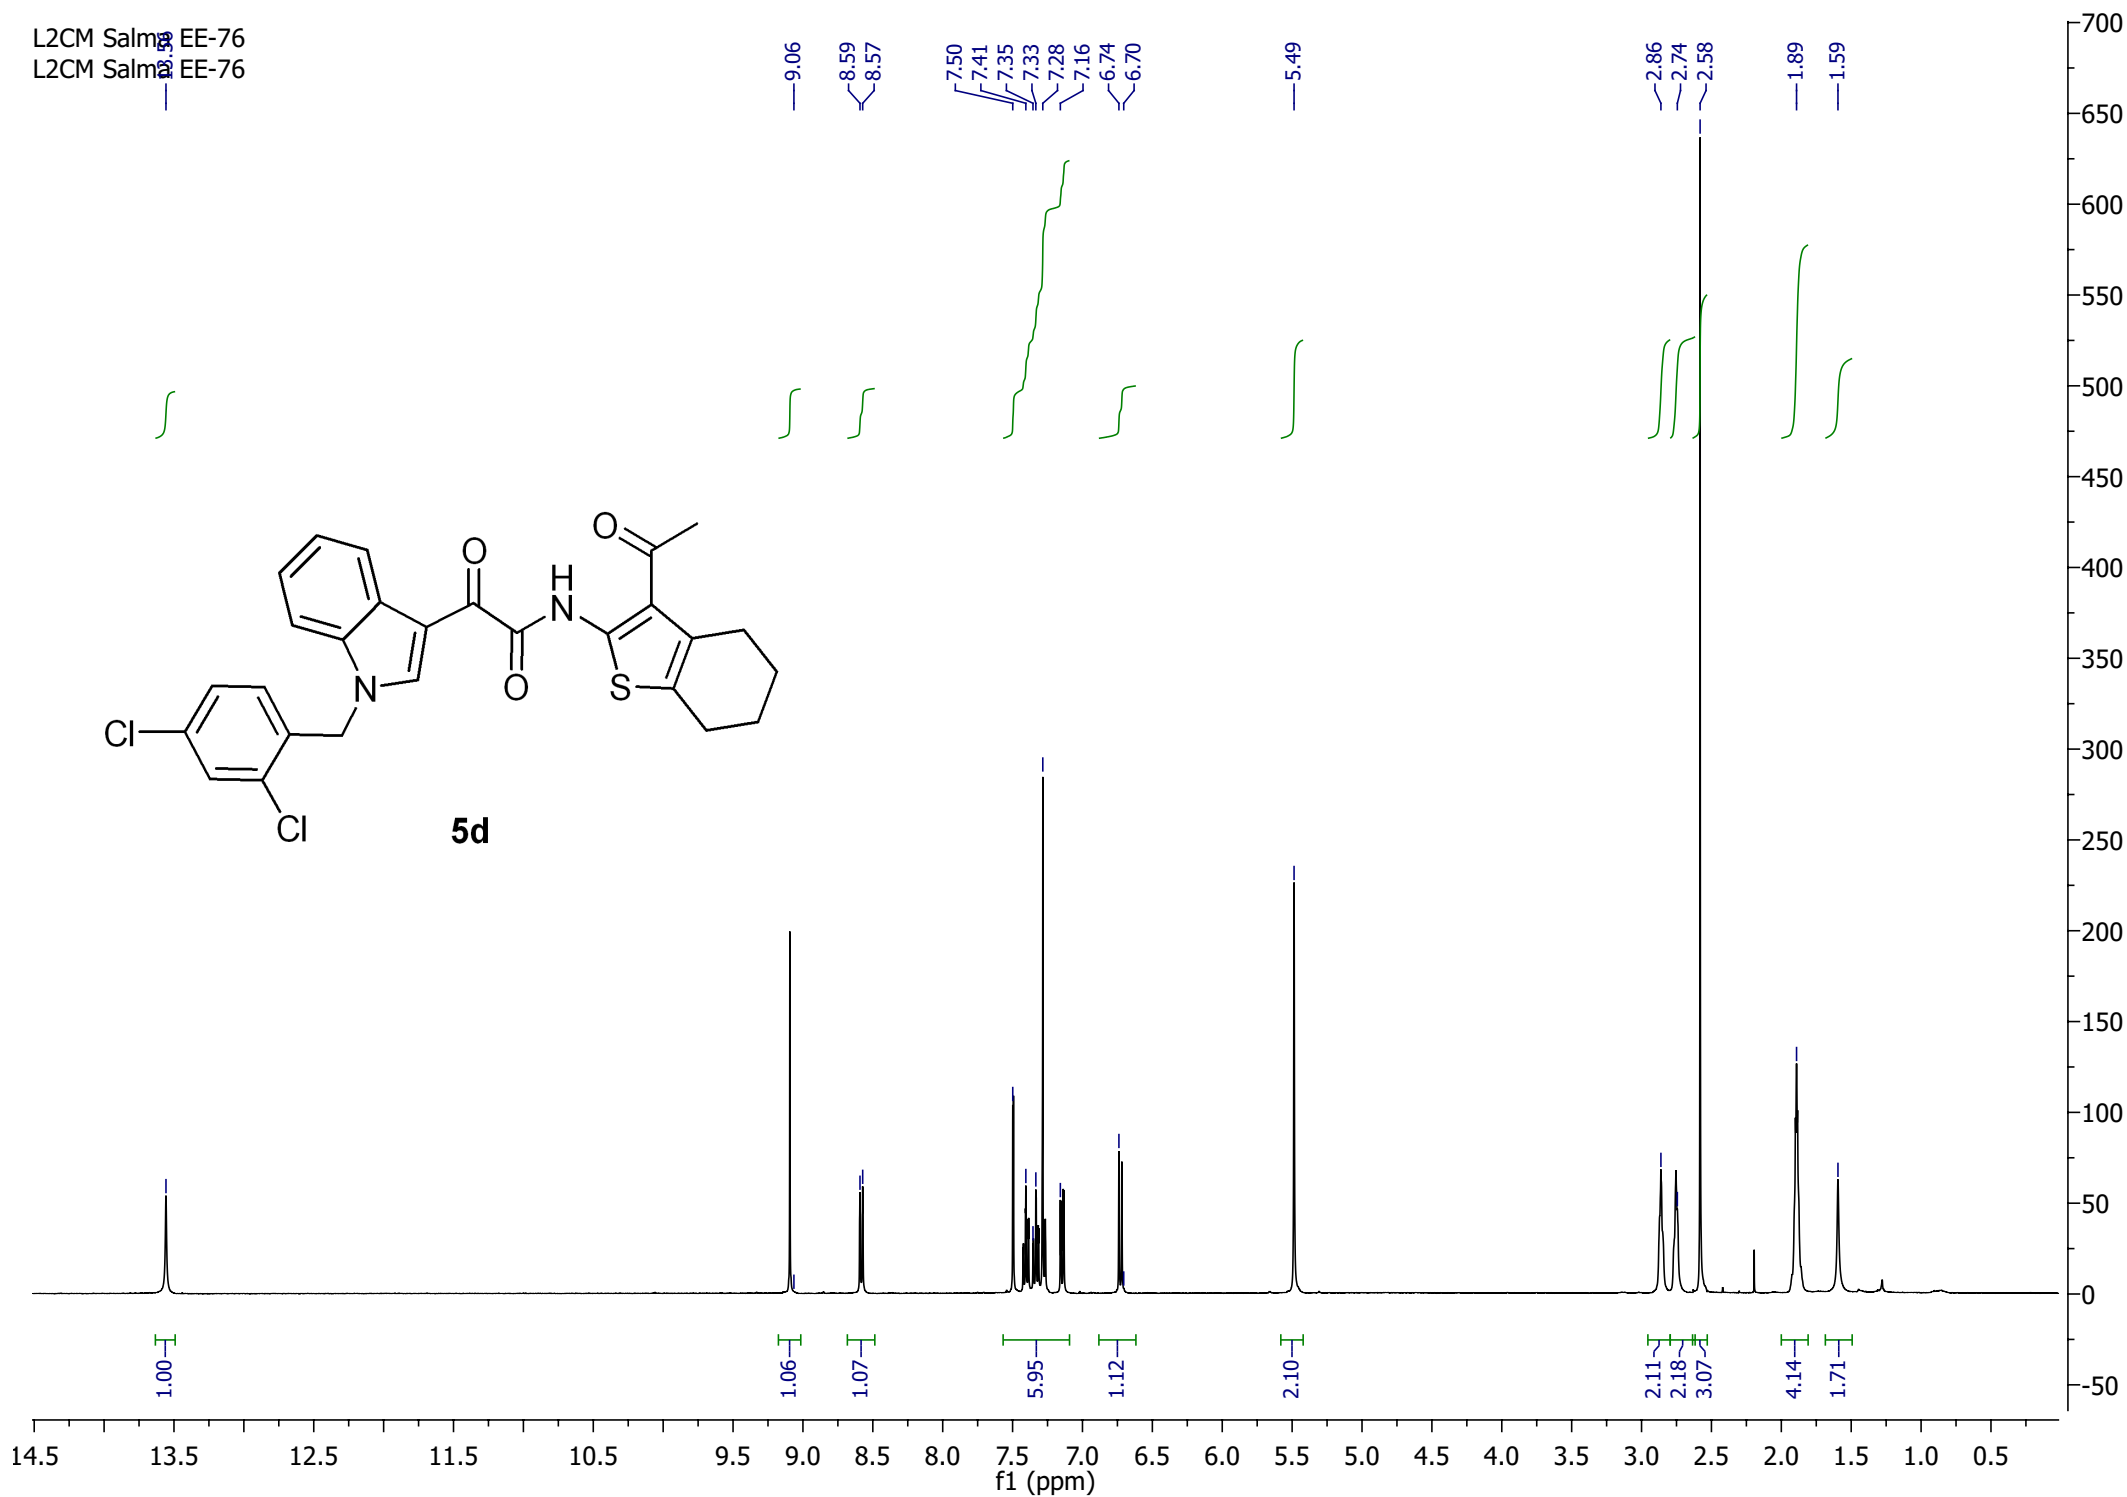

L2CM Sala EE-76  
L2CM Sala EE-76 13C

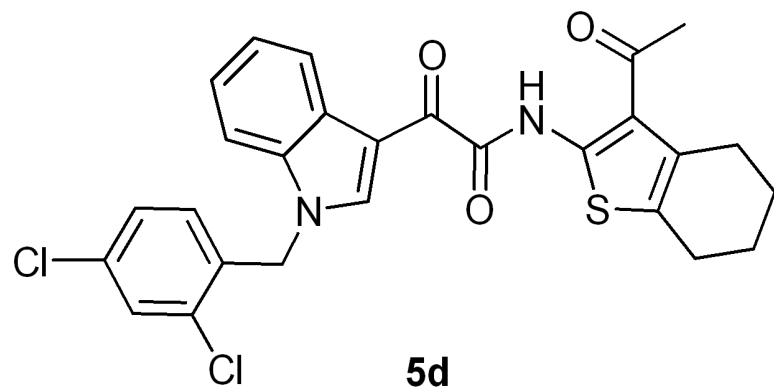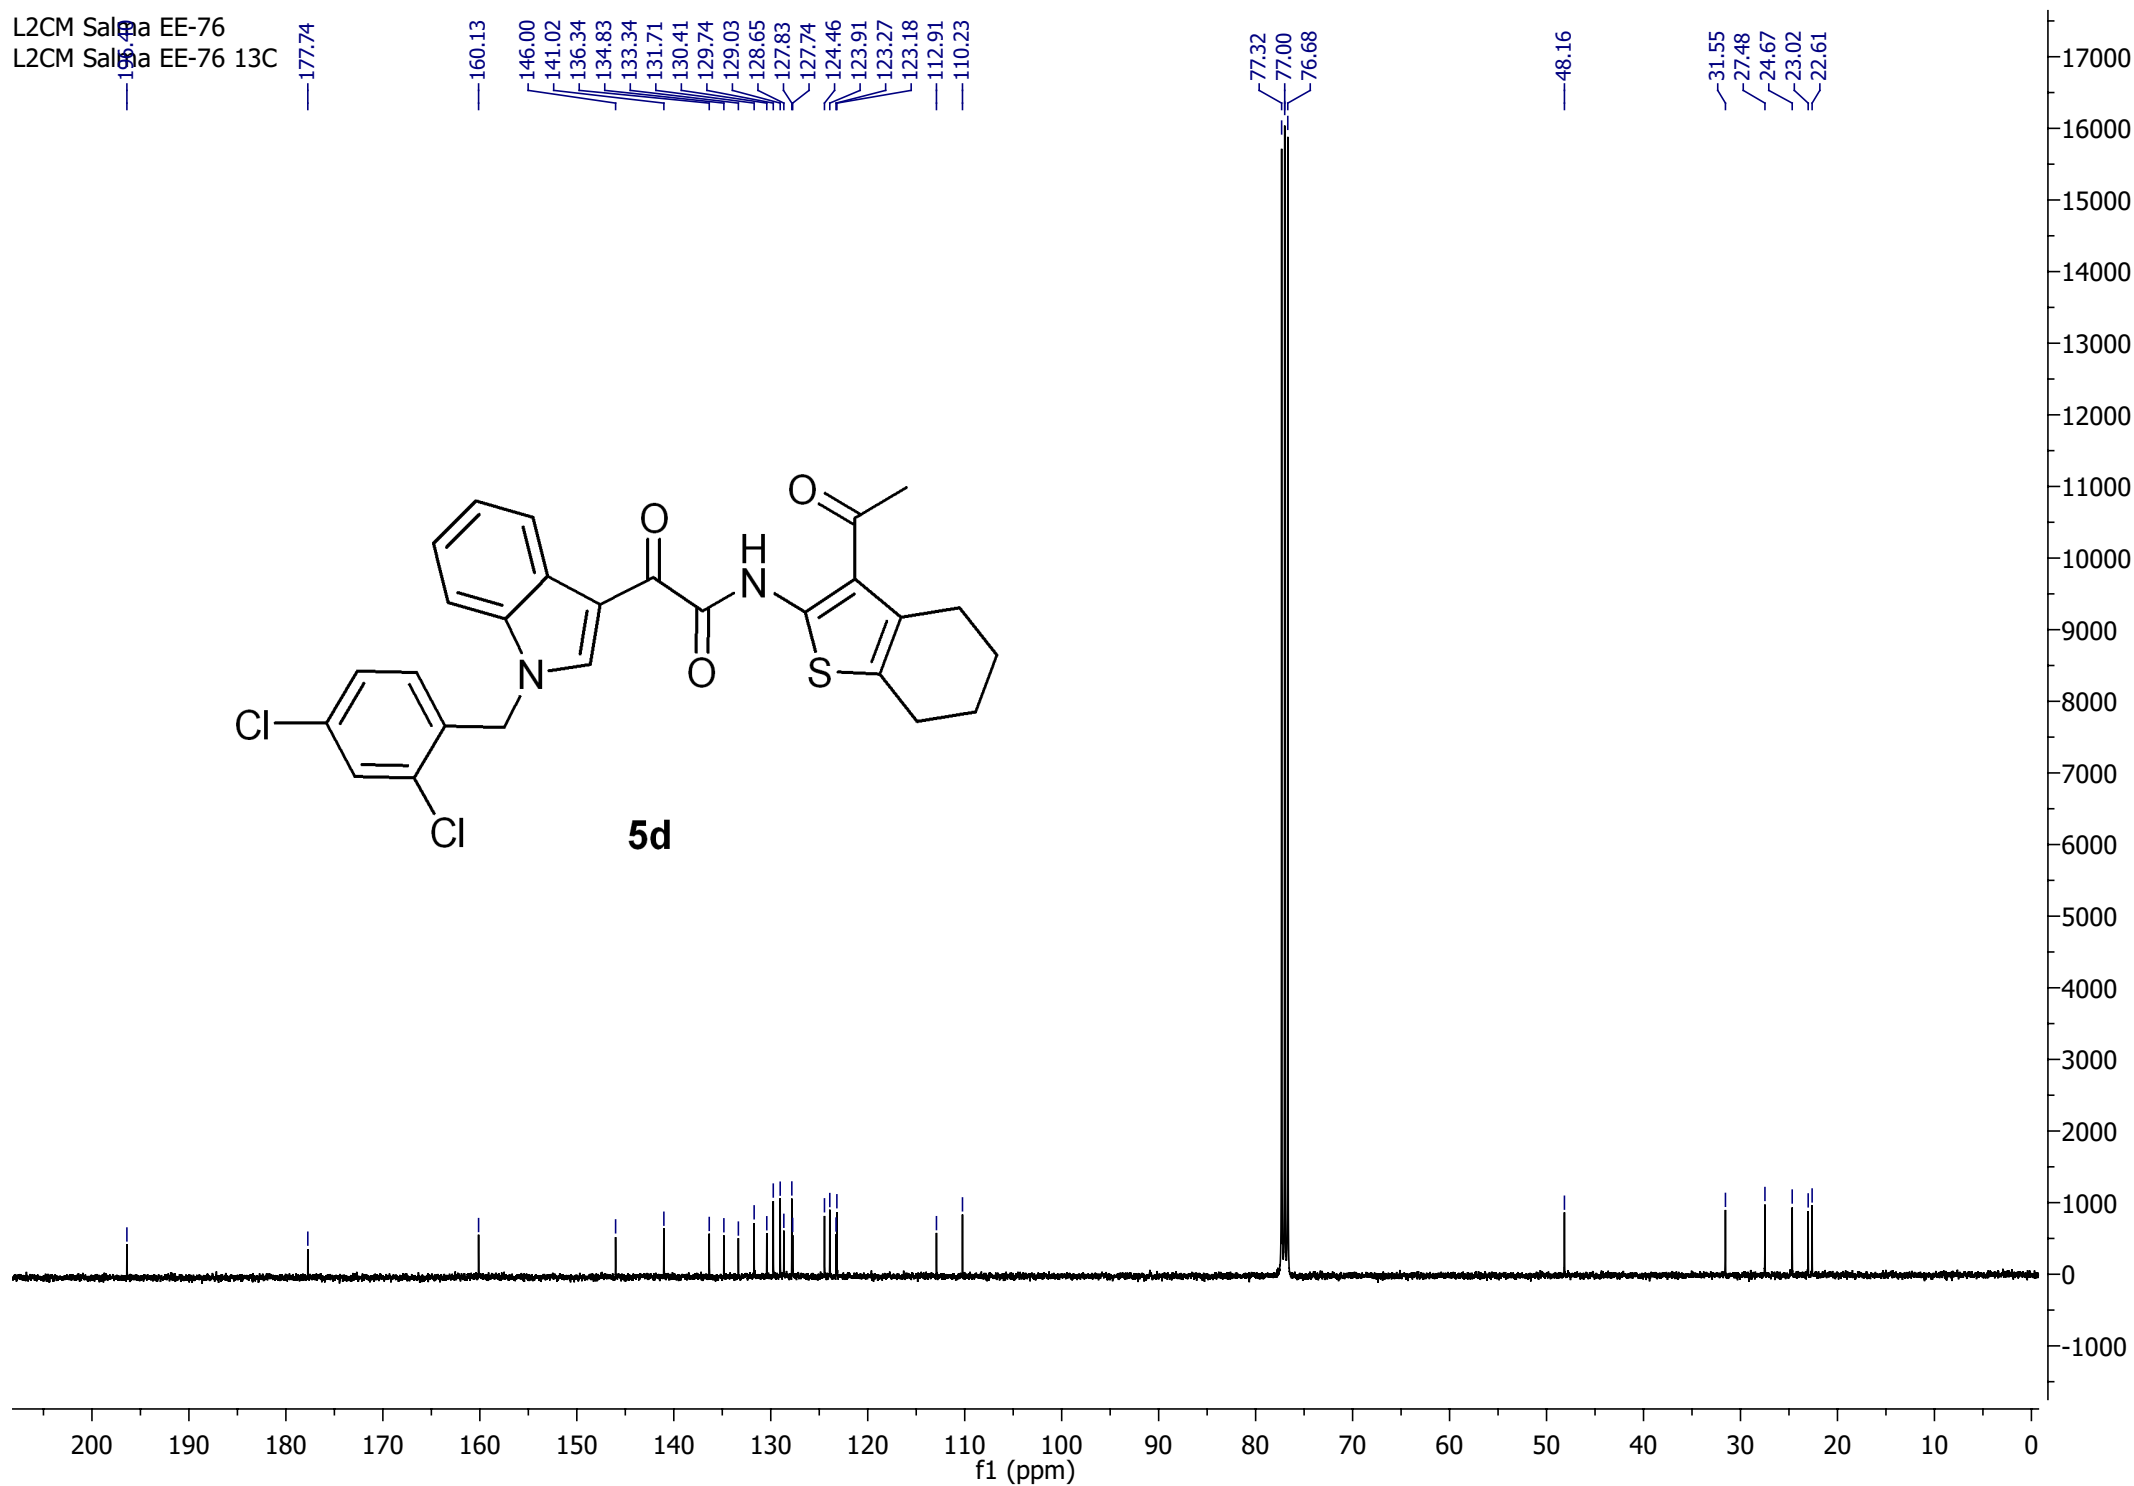

# Mass Spectrum SmartFormula Report

## Analysis Info

Analysis Name D:\Data\2018\180924000006.d  
 Method Tuneposlow.m  
 Sample Name 180913810///EE-76  
 Comment MeOH/CH<sub>2</sub>Cl<sub>2</sub>

Acquisition Date 9/24/2018 1:48:49 PM

Operator fabien  
 Instrument micrOTOF-Q 228888.00098

## Acquisition Parameter

|             |            |                       |           |                  |           |
|-------------|------------|-----------------------|-----------|------------------|-----------|
| Source Type | ESI        | Ion Polarity          | Positive  | Set Nebulizer    | 1.0 Bar   |
| Focus       | Not active | Set Capillary         | 4500 V    | Set Dry Heater   | 190 °C    |
| Scan Begin  | 50 m/z     | Set End Plate Offset  | -500 V    | Set Dry Gas      | 4.0 l/min |
| Scan End    | 3000 m/z   | Set Collision Cell RF | 250.0 Vpp | Set Divert Valve | Source    |

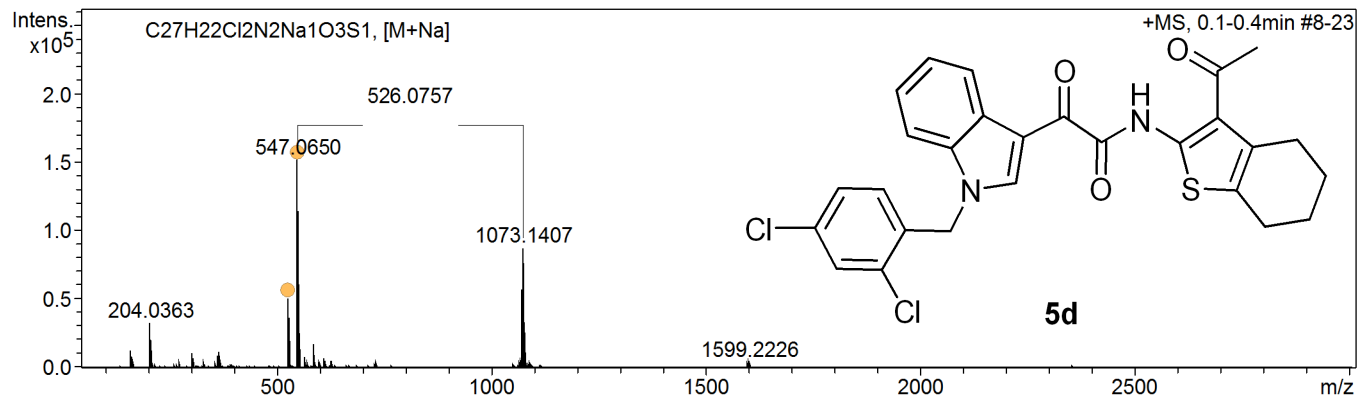

| Meas. m/z | # | Ion Formula                                                                       | m/z      | err  [mDa] | err [ppm] | mSigma | # mSigma | Score  | rdb  | e <sup>-</sup> | Conf | N-Rule |
|-----------|---|-----------------------------------------------------------------------------------|----------|------------|-----------|--------|----------|--------|------|----------------|------|--------|
| 525.0828  | 1 | C <sub>27</sub> H <sub>23</sub> Cl <sub>2</sub> N <sub>2</sub> O <sub>3</sub> S   | 525.0801 | 2.7        | -5.2      | 6.8    | 1        | 100.00 | 16.5 | even           |      | ok     |
| 547.0650  | 1 | C <sub>27</sub> H <sub>22</sub> Cl <sub>2</sub> N <sub>2</sub> NaO <sub>3</sub> S | 547.0620 | 3.0        | -5.5      | 7.5    | 1        | 100.00 | 16.5 | even           |      | ok     |

L2CM Salma AE-77  
L2CM Salma AE-77 13cpd

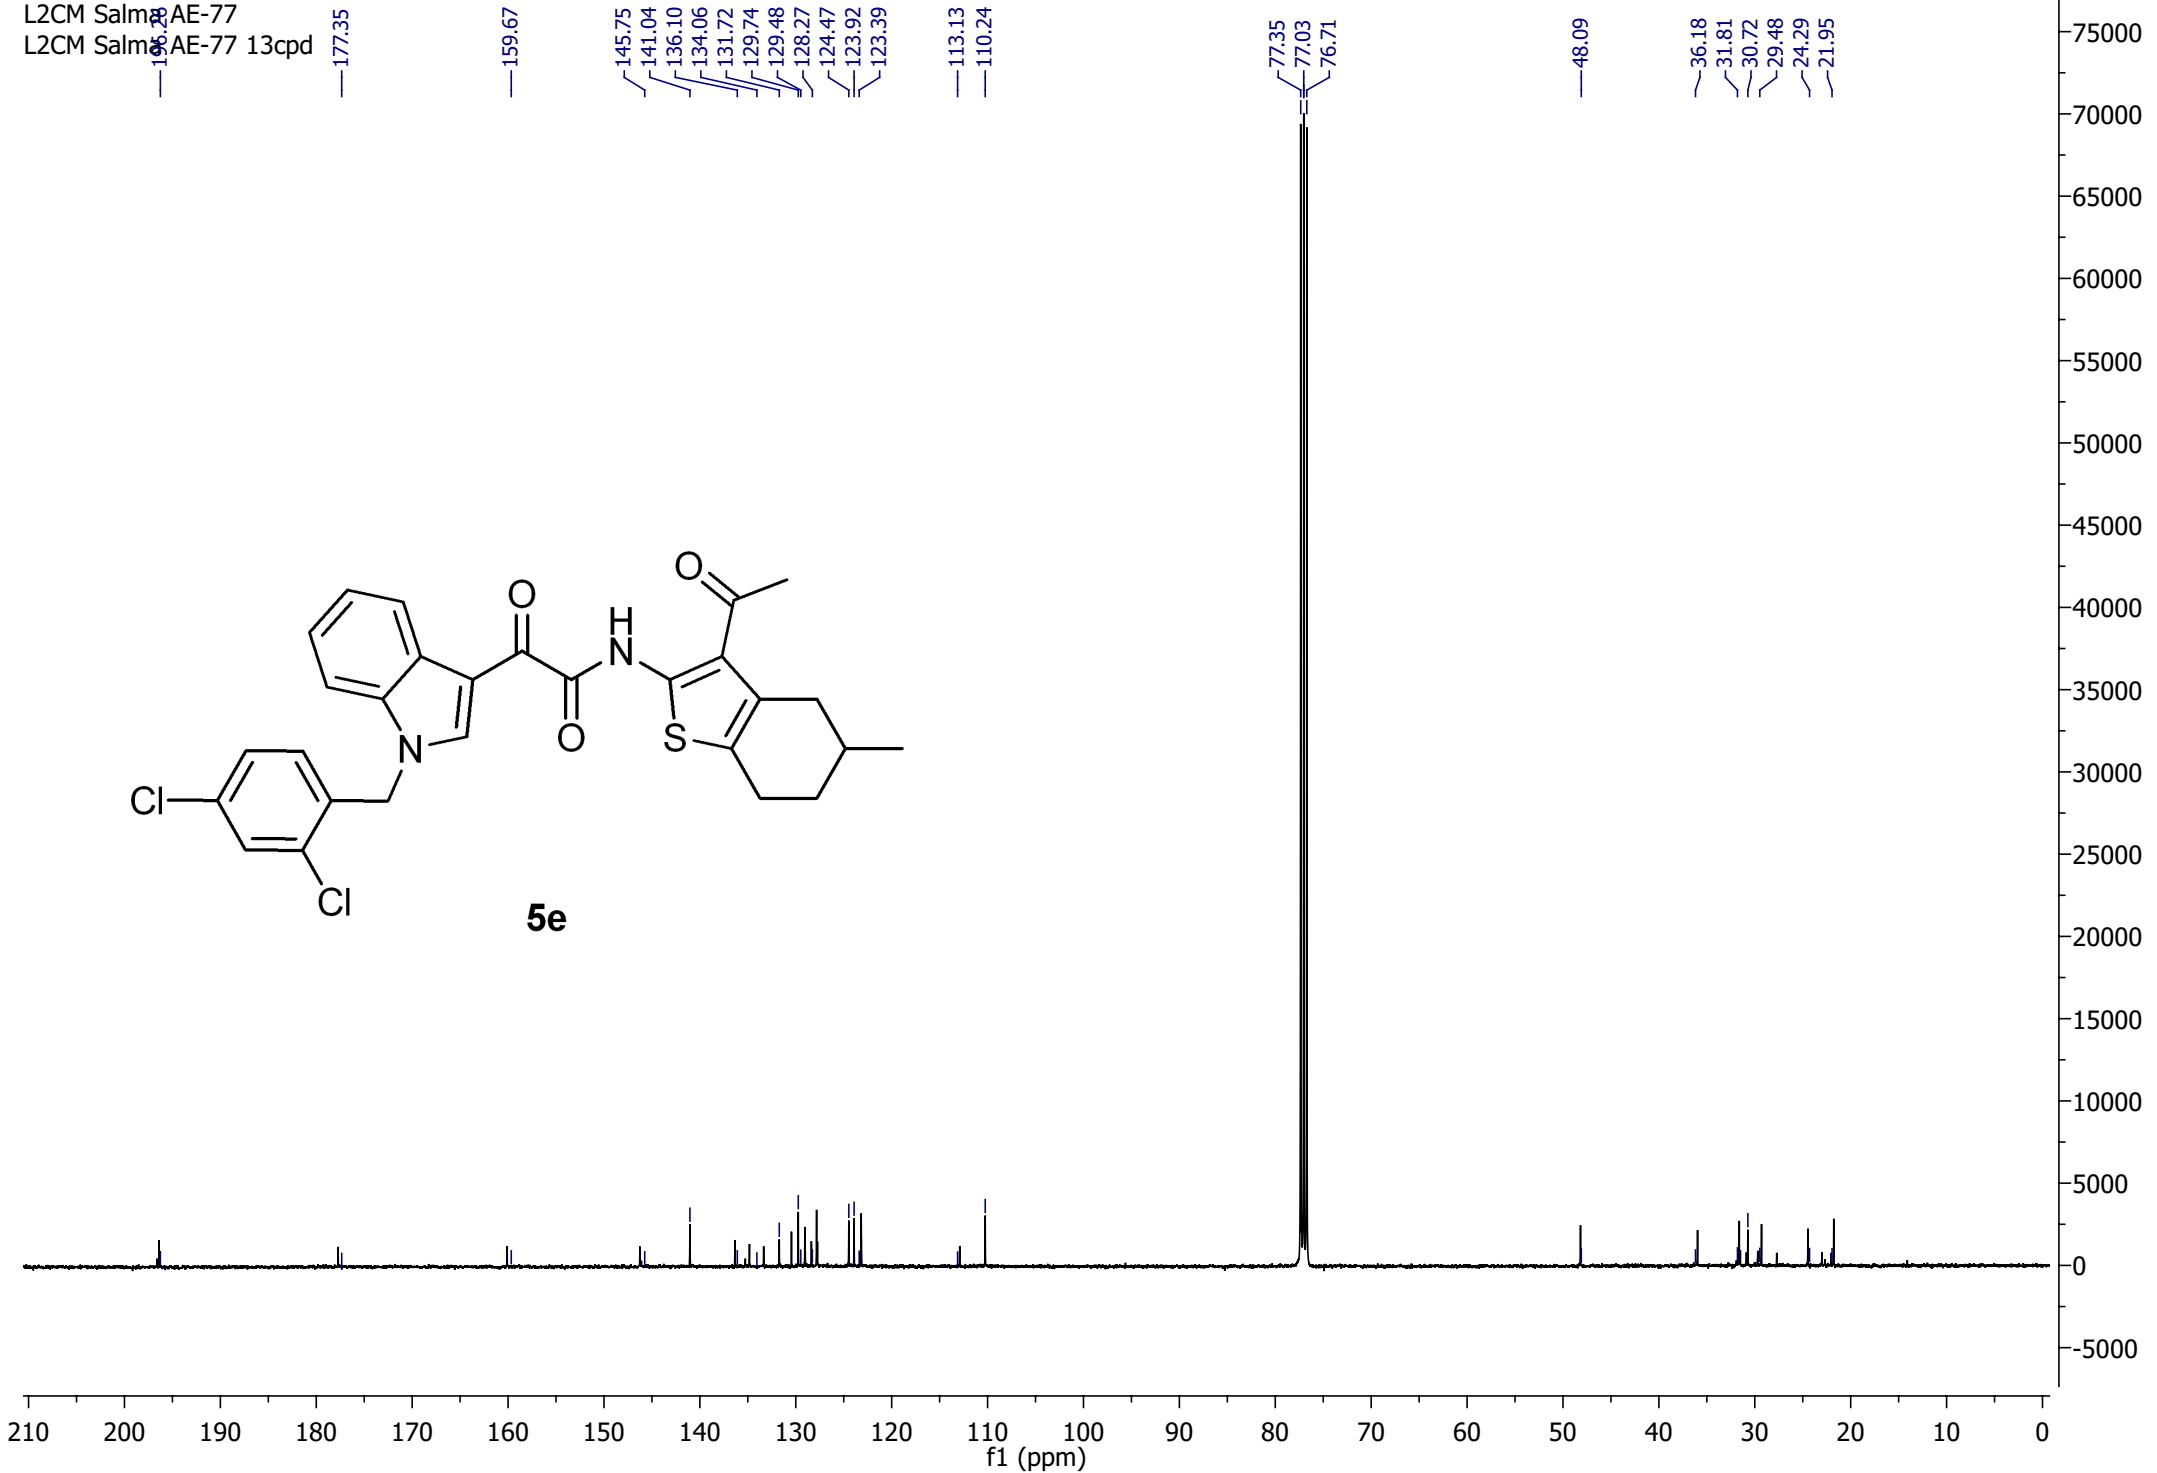

L2CM Salma EE-77  
L2CM Salma EE-77

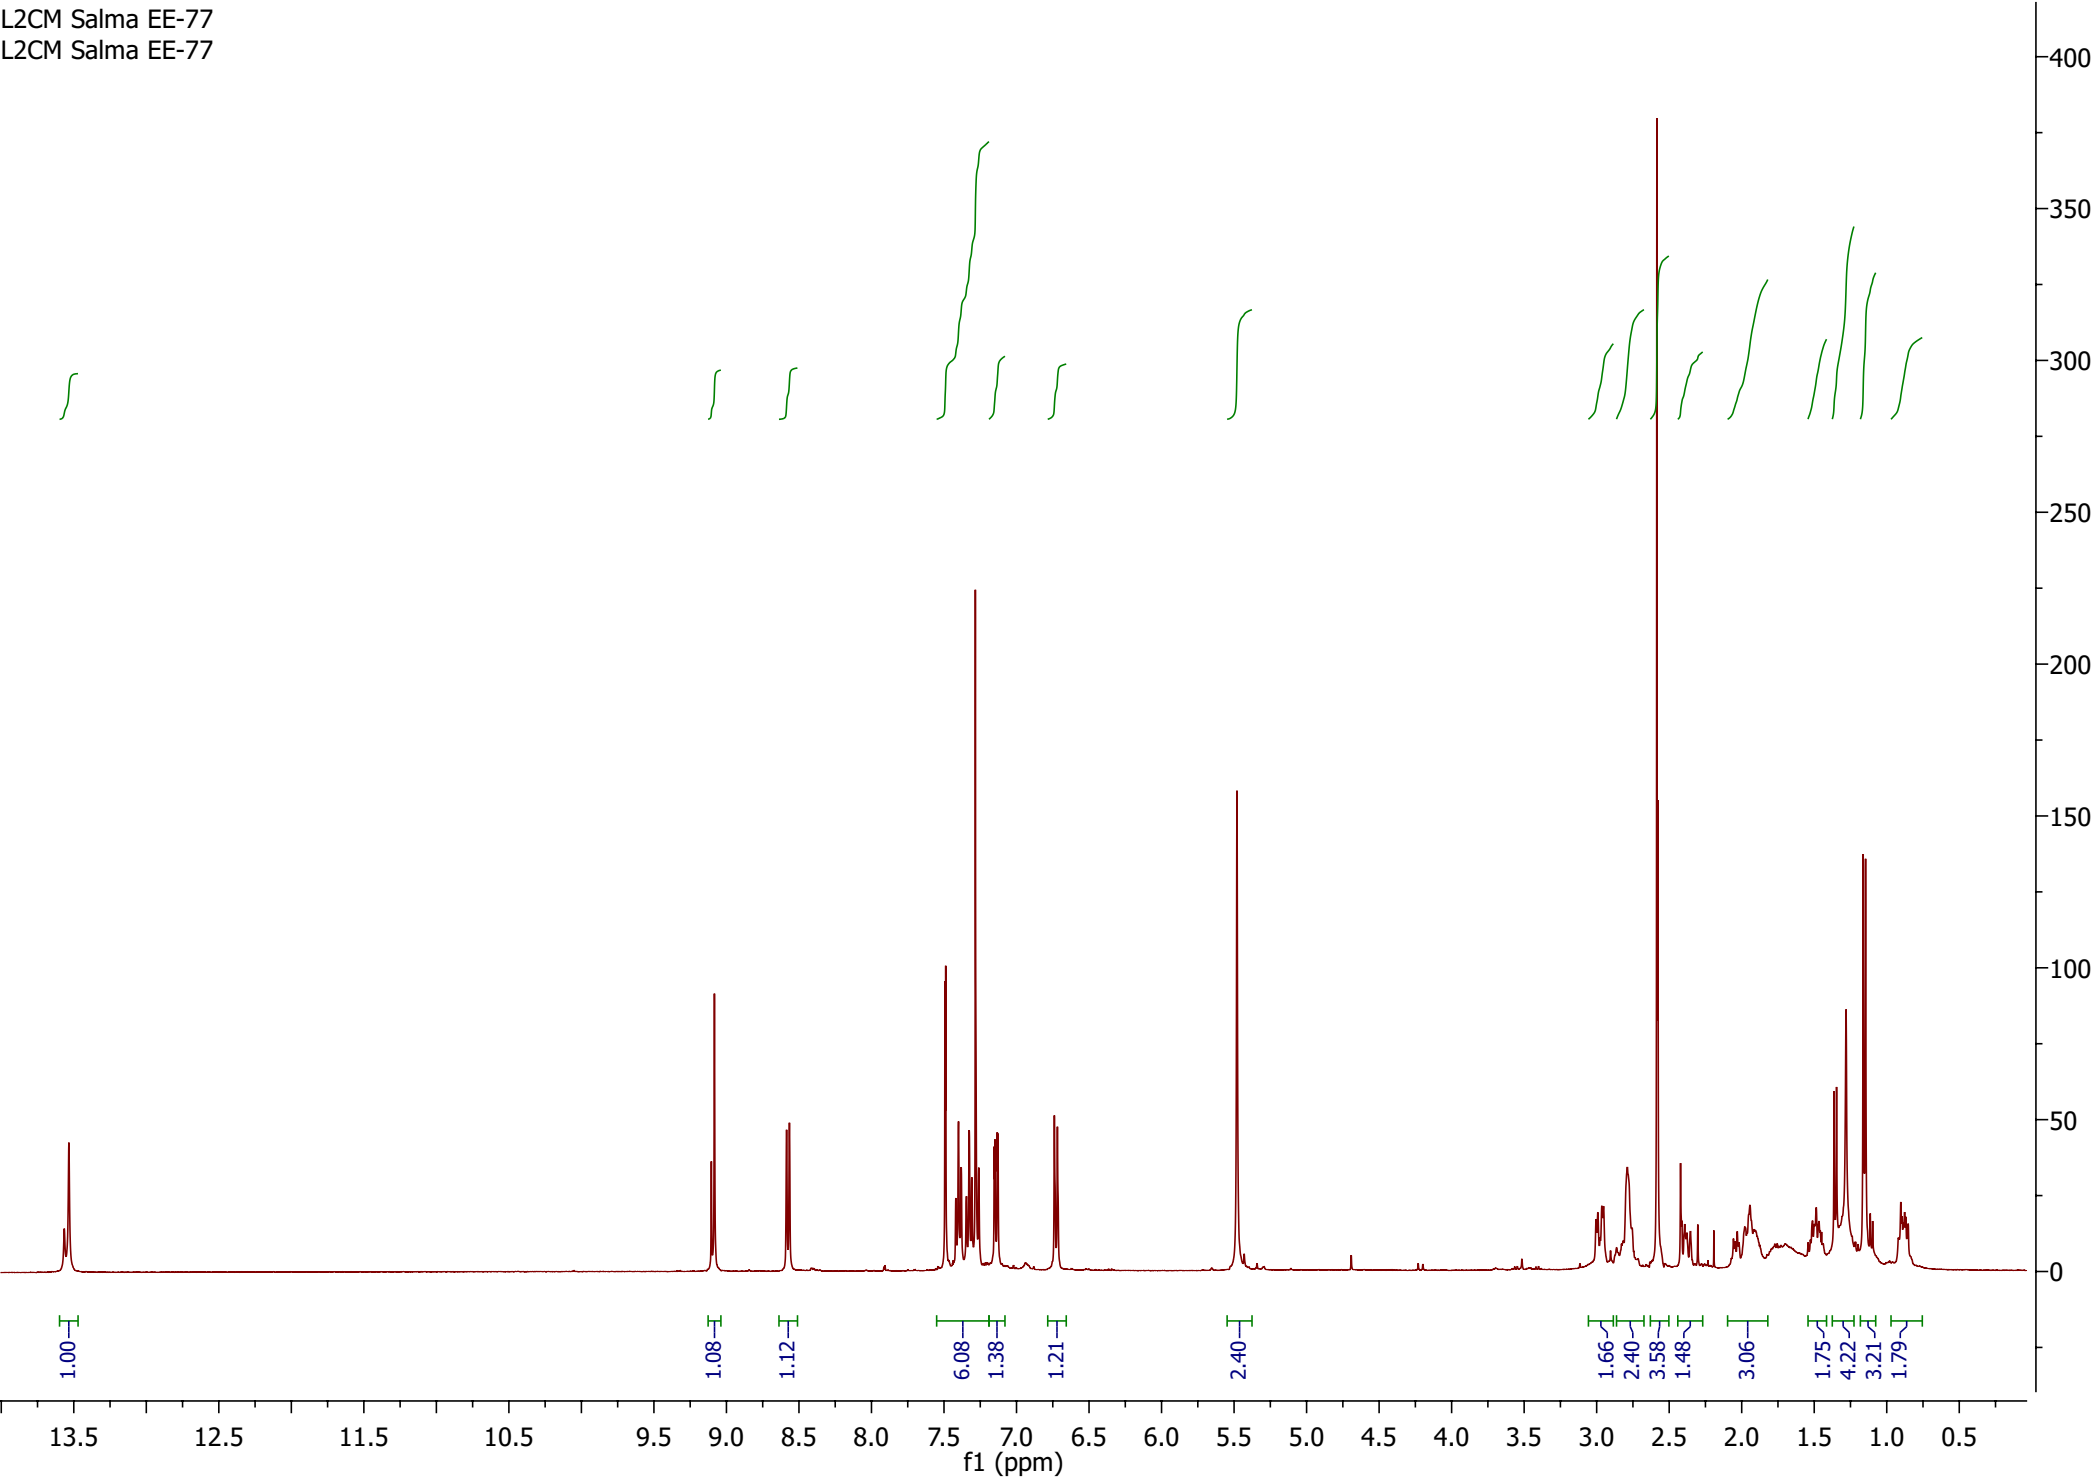

L2CM Salma AE-78

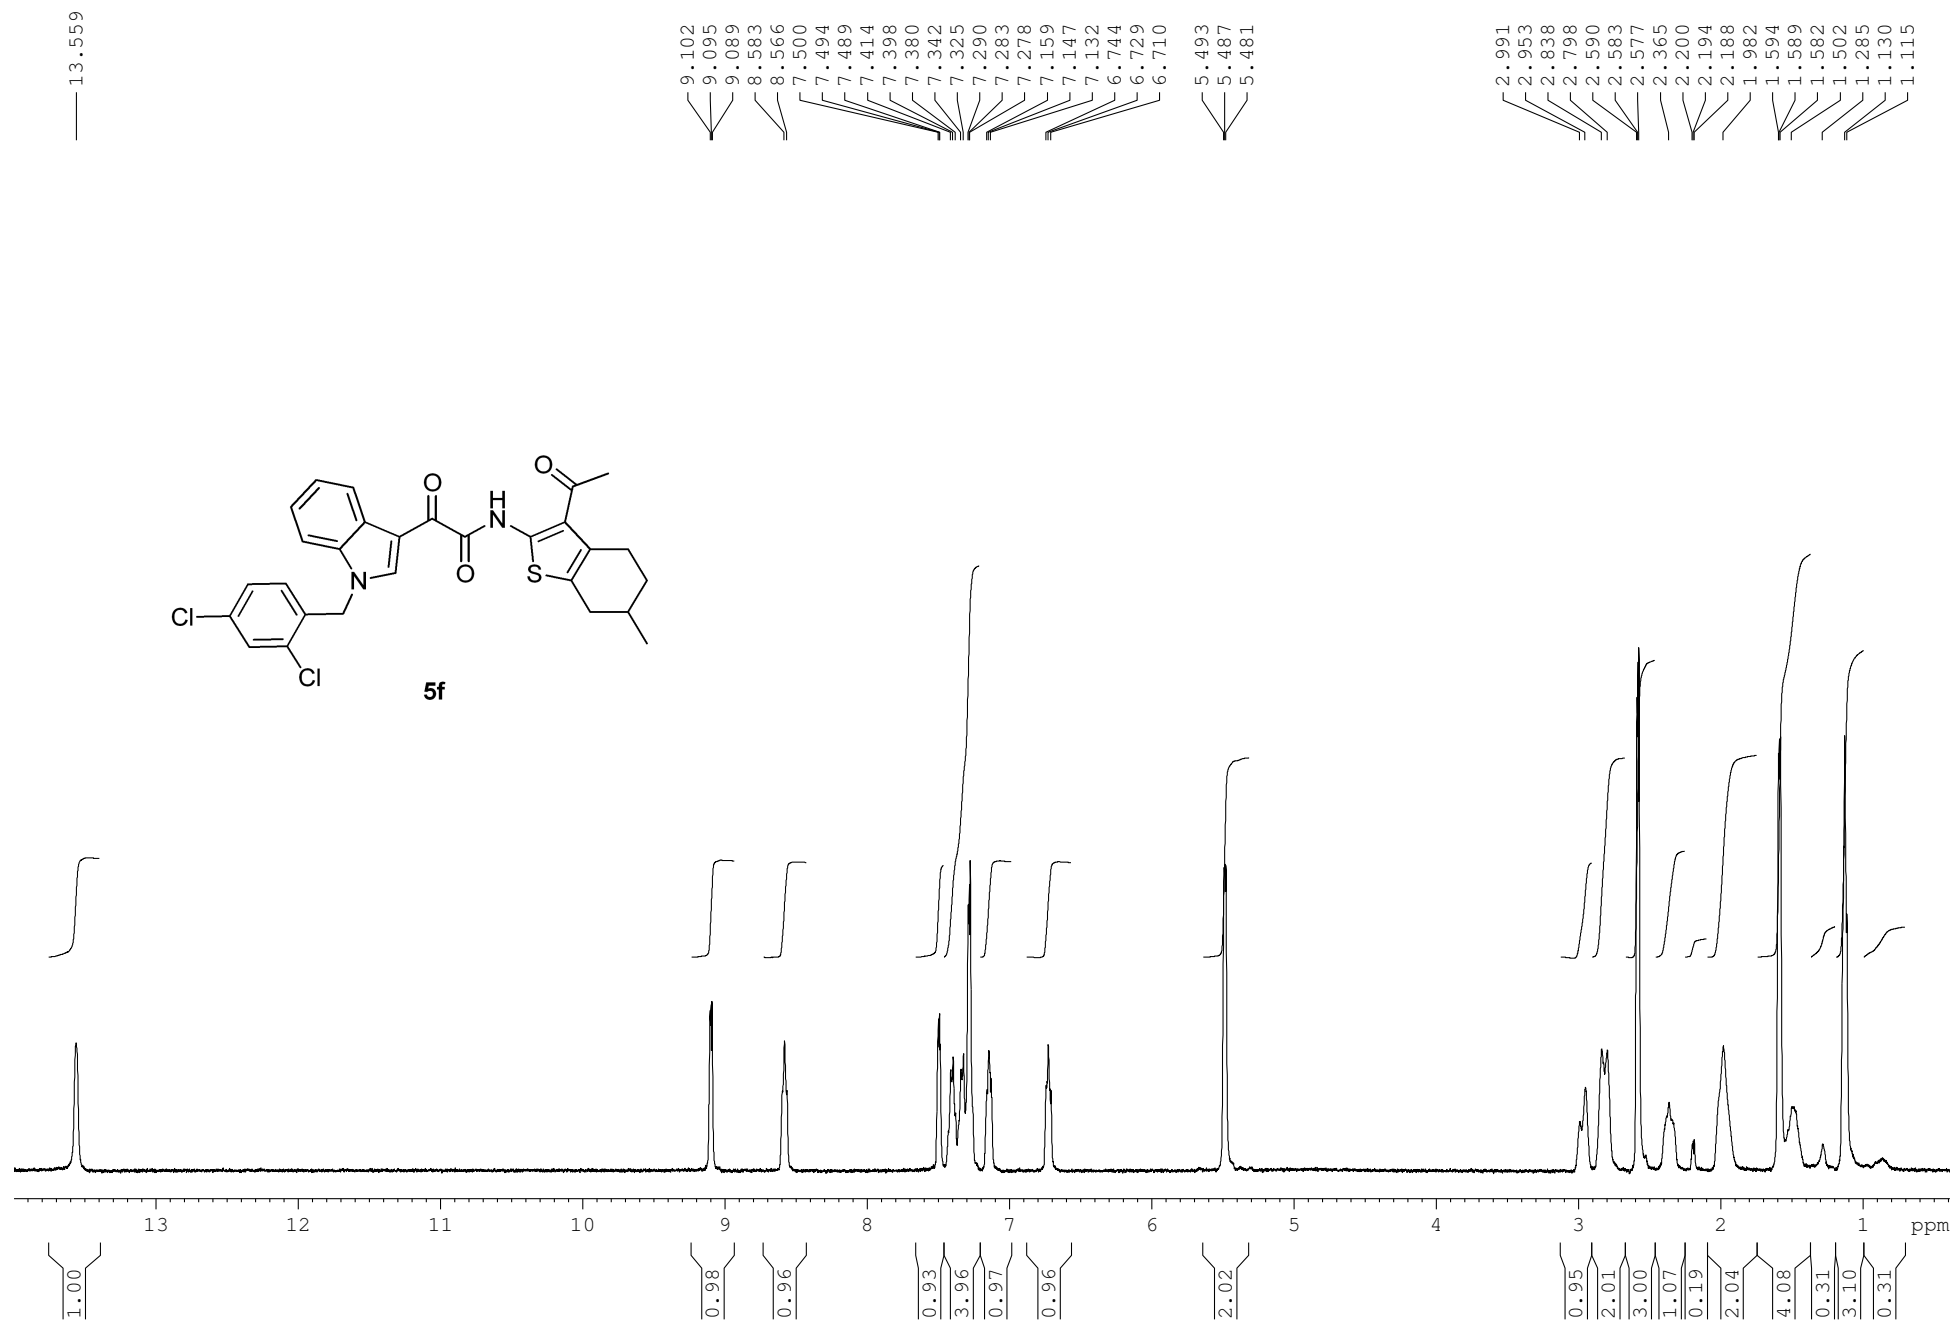



L2CM Salma EE-78 <sup>13</sup>C

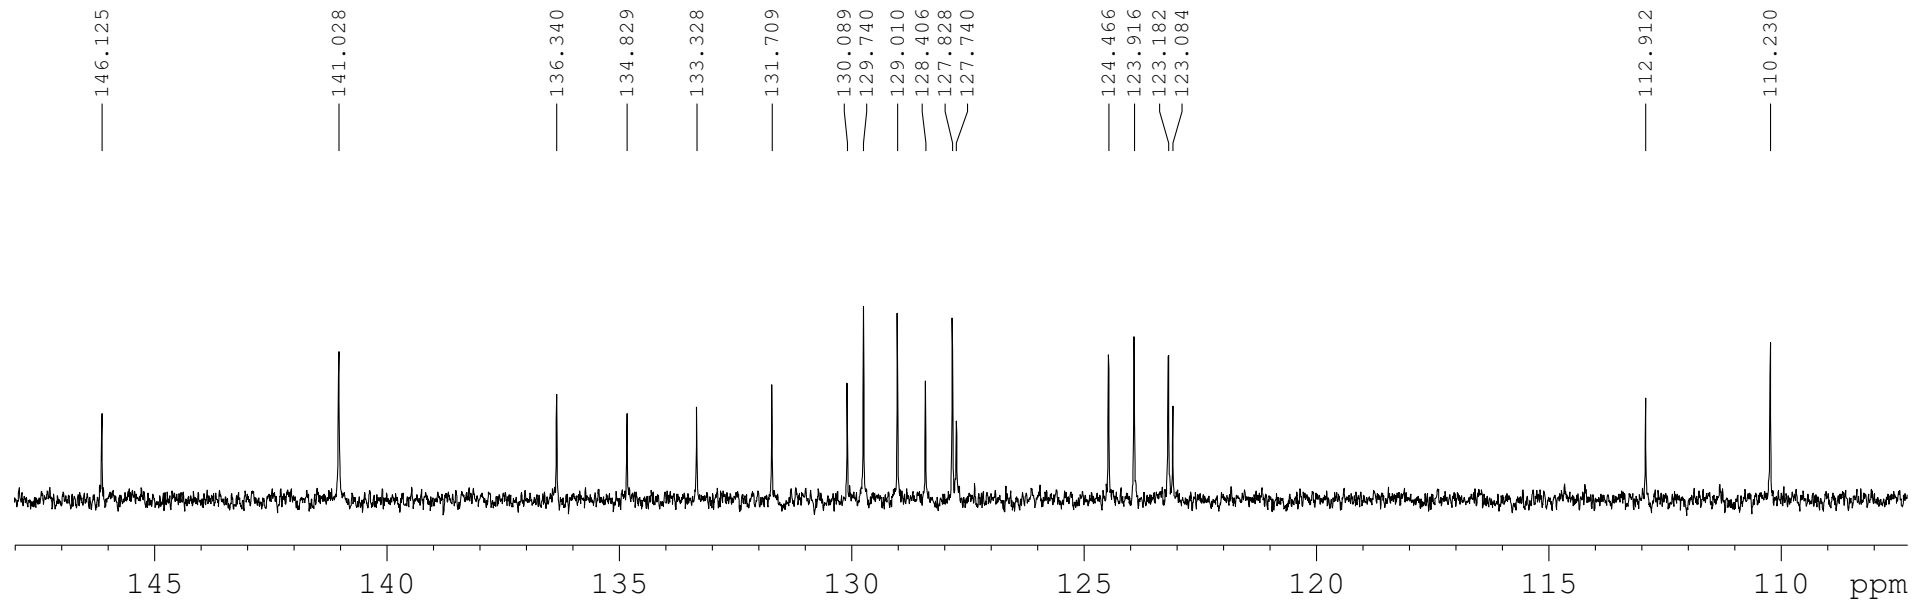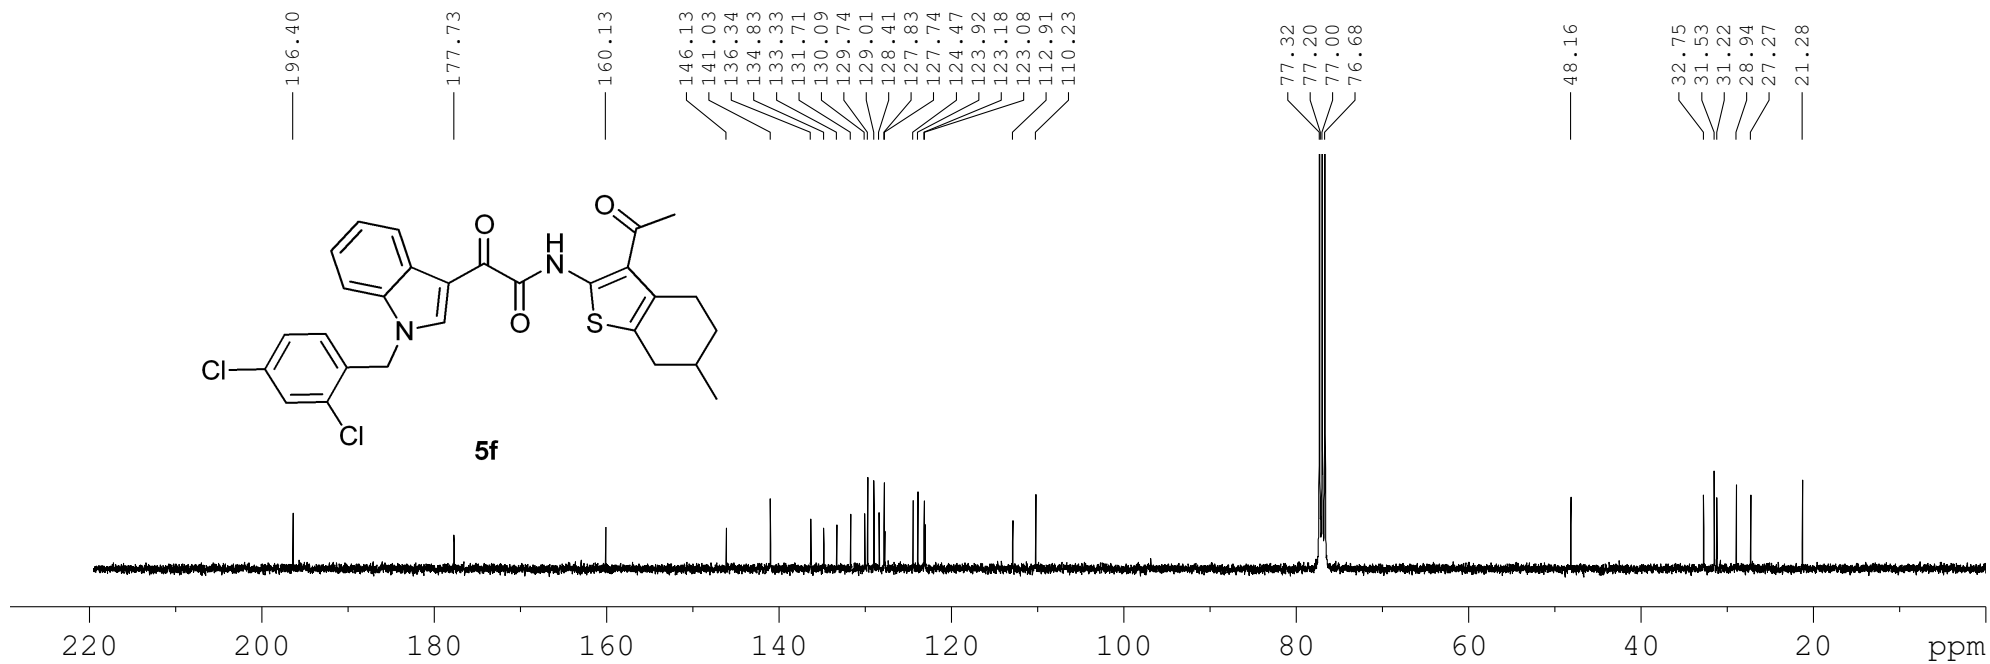

# Mass Spectrum SmartFormula Report

## Analysis Info

Analysis Name D:\Data\2018\180924000007.d  
 Method Tuneposlow.m  
 Sample Name 180913811///EE-78  
 Comment MeOH/CH<sub>2</sub>Cl<sub>2</sub>

Acquisition Date 9/24/2018 1:55:36 PM

Operator fabien  
 Instrument micrOTOF-Q 228888.00098

## Acquisition Parameter

|             |            |                       |           |                  |           |
|-------------|------------|-----------------------|-----------|------------------|-----------|
| Source Type | ESI        | Ion Polarity          | Positive  | Set Nebulizer    | 1.0 Bar   |
| Focus       | Not active | Set Capillary         | 4500 V    | Set Dry Heater   | 190 °C    |
| Scan Begin  | 50 m/z     | Set End Plate Offset  | -500 V    | Set Dry Gas      | 4.0 l/min |
| Scan End    | 3000 m/z   | Set Collision Cell RF | 250.0 Vpp | Set Divert Valve | Source    |

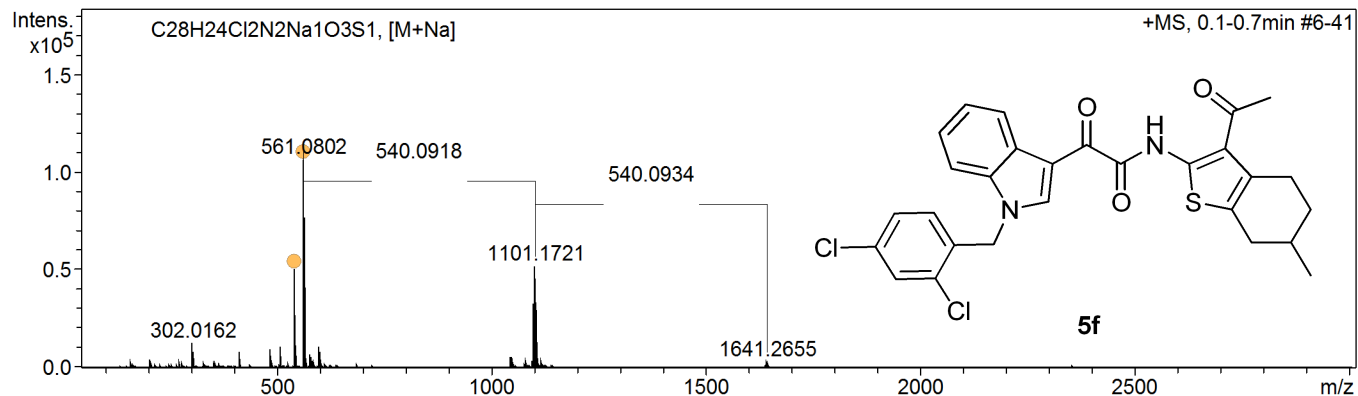

| Meas. m/z | # | Ion Formula                                                                       | m/z      | err  [mDa] | err [ppm] | mSigma | # mSigma | Score  | rdb  | e <sup>-</sup> | Conf | N-Rule |
|-----------|---|-----------------------------------------------------------------------------------|----------|------------|-----------|--------|----------|--------|------|----------------|------|--------|
| 539.0979  | 1 | C <sub>28</sub> H <sub>25</sub> Cl <sub>2</sub> N <sub>2</sub> O <sub>3</sub> S   | 539.0957 | 2.2        | -4.1      | 13.3   | 1        | 100.00 | 16.5 | even           | ok   | ok     |
| 561.0802  | 1 | C <sub>28</sub> H <sub>24</sub> Cl <sub>2</sub> N <sub>2</sub> NaO <sub>3</sub> S | 561.0777 | 2.5        | -4.5      | 8.7    | 1        | 100.00 | 16.5 | even           | ok   | ok     |

L2CM Salma EE-79  
L2CM Salma EE-79

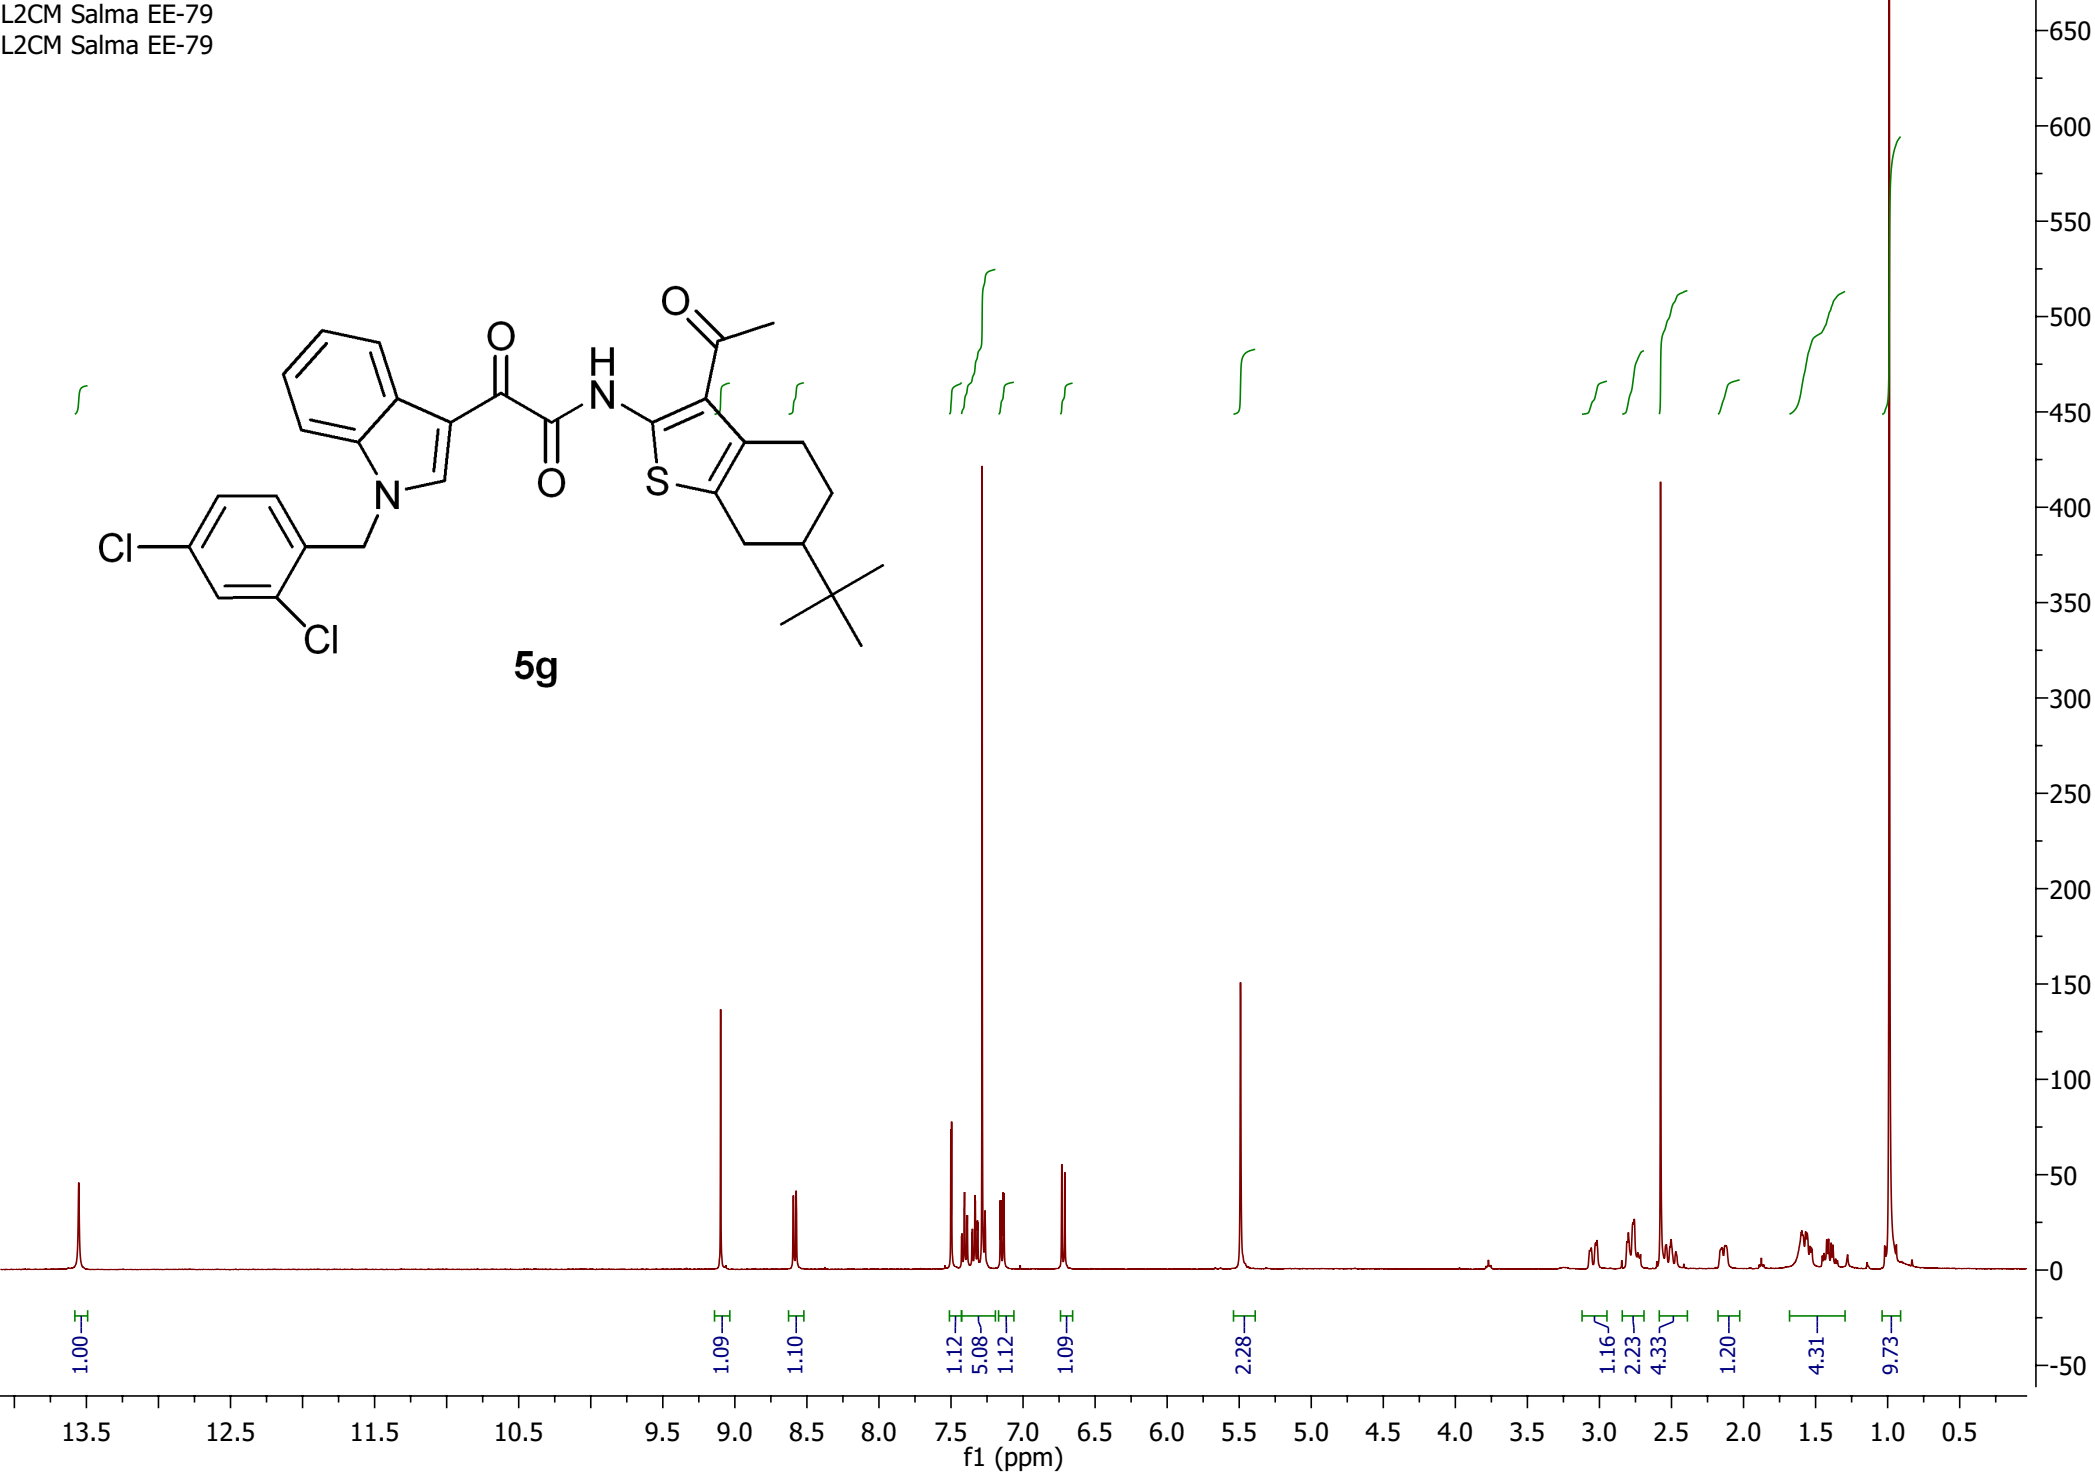

L2cm salma EE-79

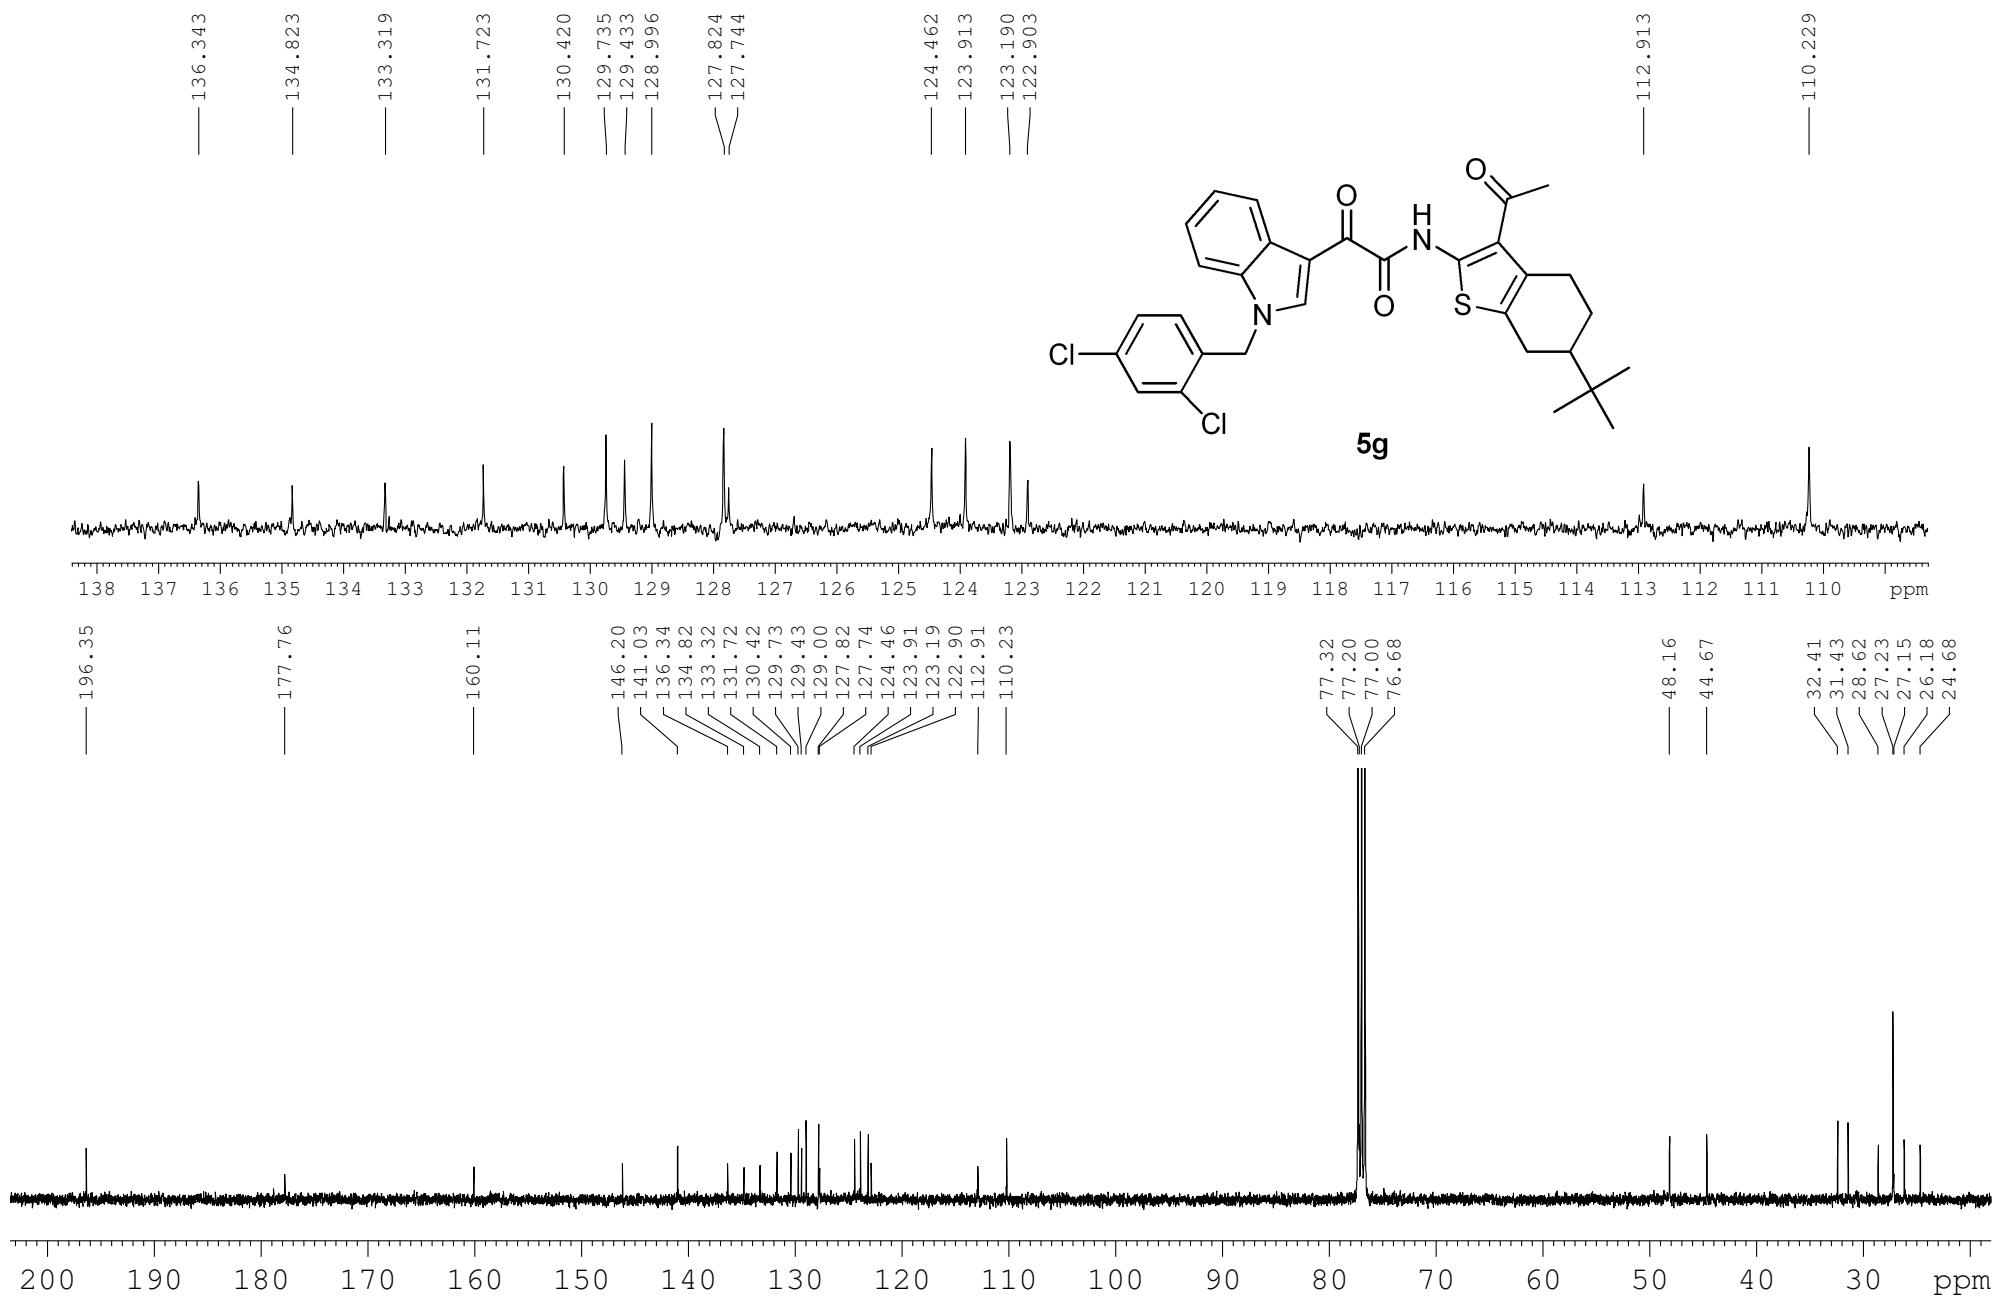

# Mass Spectrum SmartFormula Report

## Analysis Info

Analysis Name D:\Data\2018\180924000008.d  
 Method Tuneposlow.m  
 Sample Name 180913812///EE-79  
 Comment MeOH/CH<sub>2</sub>Cl<sub>2</sub>

Acquisition Date 9/24/2018 2:20:41 PM

Operator fabien  
 Instrument micrOTOF-Q 228888.00098

## Acquisition Parameter

| Source Type | ESI        | Ion Polarity          | Positive  | Set Nebulizer    | 1.0 Bar   |
|-------------|------------|-----------------------|-----------|------------------|-----------|
| Focus       | Not active | Set Capillary         | 4500 V    | Set Dry Heater   | 190 °C    |
| Scan Begin  | 50 m/z     | Set End Plate Offset  | -500 V    | Set Dry Gas      | 4.0 l/min |
| Scan End    | 3000 m/z   | Set Collision Cell RF | 250.0 Vpp | Set Divert Valve | Source    |

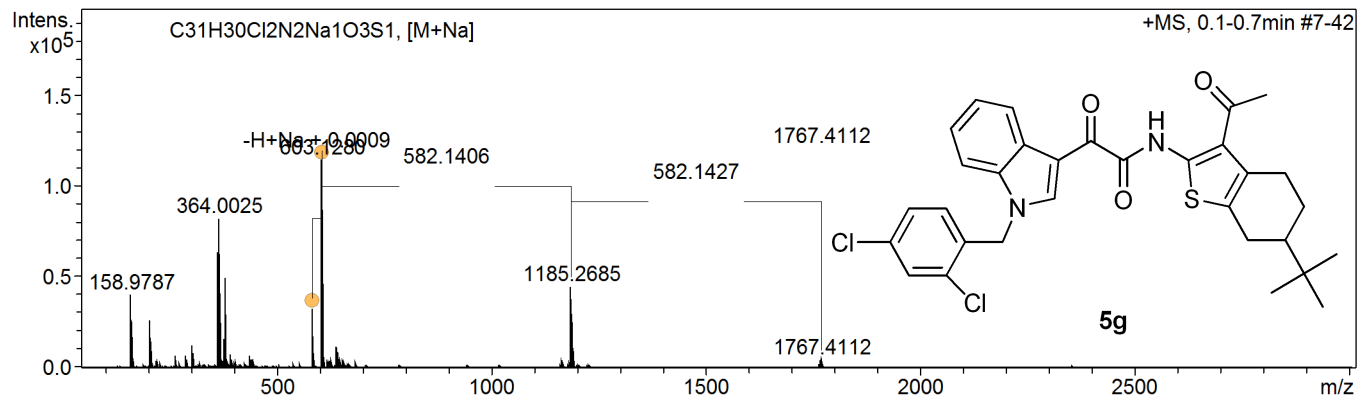

| Meas. m/z | # | Ion Formula                                                                       | m/z      | [err] [mDa] | err [ppm] | mSigma | # mSigma | Score  | rdb  | e <sup>-</sup> | Conf | N-Rule |
|-----------|---|-----------------------------------------------------------------------------------|----------|-------------|-----------|--------|----------|--------|------|----------------|------|--------|
| 581.1451  | 1 | C <sub>31</sub> H <sub>31</sub> Cl <sub>2</sub> N <sub>2</sub> O <sub>3</sub> S   | 581.1427 | 2.4         | -4.2      | 10.9   | 1        | 100.00 | 16.5 | even           | ok   | ok     |
| 603.1280  | 1 | C <sub>31</sub> H <sub>30</sub> Cl <sub>2</sub> N <sub>2</sub> NaO <sub>3</sub> S | 603.1246 | 3.3         | -5.5      | 3.2    | 1        | 100.00 | 16.5 | even           | ok   | ok     |
